# Supplementary material for: Characterization of a novel OX40 ligand and CD40 ligand-expressing oncolytic adenovirus used in the PeptiCRAd cancer vaccine platform
Source: PubMed Central journal article supplement (PMC7917457; doi:10.1016/j.omto.2021.02.006), 2021-02-10
Supplement: mmc2.pdf [file mmc2.pdf]

# Aligned using an external algorithm

## Consensus

1. First analysis after plaque purification
2. Analysis after seven cycles of amplification

|   |     |                                                              |     |
|---|-----|--------------------------------------------------------------|-----|
| 1 | 1   | CATCATCAATAATATACCTTATTTTGGATTGAAGCCAATATGATAATGAGGGGGTGGAGT | 60  |
|   |     |                                                              |     |
| 2 | 1   | CATCATCAATAATATACCTTATTTTGGATTGAAGCCAATATGATAATGAGGGGGTGGAGT | 60  |
|   |     |                                                              |     |
| 1 | 61  | TTGTGACGTGGCGCGGGGCGTGGGAACGGGGCGGGTGACGTAGTAGTGTGGCGGAAGTGT | 120 |
|   |     |                                                              |     |
| 2 | 61  | TTGTGACGTGGCGCGGGGCGTGGGAACGGGGCGGGTGACGTAGTAGTGTGGCGGAAGTGT | 120 |
|   |     |                                                              |     |
| 1 | 121 | GATGTTGCAAGTGTGGCGGAACACATGTAAGCGACGGATGTGGCAAAGTGACGTTTTTG  | 180 |
|   |     |                                                              |     |
| 2 | 121 | GATGTTGCAAGTGTGGCGGAACACATGTAAGCGACGGATGTGGCAAAGTGACGTTTTTG  | 180 |
|   |     |                                                              |     |
| 1 | 181 | GTGTGCGCCGGTGTACACAGGAAGTGACAATTTTCGCGCGGTTTTAGGCGGATGTTGTAG | 240 |
|   |     |                                                              |     |
| 2 | 181 | GTGTGCGCCGGTGTACACAGGAAGTGACAATTTTCGCGCGGTTTTAGGCGGATGTTGTAG | 240 |
|   |     |                                                              |     |
| 1 | 241 | TAAATTTGGGCGTAACCGAGTAAGATTTGGCCATTTTCGCGGGAAAAGTGAATAAGAGGA | 300 |
|   |     |                                                              |     |
| 2 | 241 | TAAATTTGGGCGTAACCGAGTAAGATTTGGCCATTTTCGCGGGAAAAGTGAATAAGAGGA | 300 |
|   |     |                                                              |     |
| 1 | 301 | AGTGAAATCTGAATAATTTTGTGTTACTCATAGCGCGTAATATTTGTCTAGGGCCGCGGG | 360 |
|   |     |                                                              |     |
| 2 | 301 | AGTGAAATCTGAATAATTTTGTGTTACTCATAGCGCGTAATATTTGTCTAGGGCCGCGGG | 360 |
|   |     |                                                              |     |
| 1 | 361 | GACTTTGACCGTTTACGTGGAGACTCGCCAGGTGTTTTTCTCAGGTGTTTTCCGCGTTC  | 420 |
|   |     |                                                              |     |
| 2 | 361 | GACTTTGACCGTTTACGTGGAGACTCGCCAGGTGTTTTTCTCAGGTGTTTTCCGCGTTC  | 420 |
|   |     |                                                              |     |
| 1 | 421 | CGGGTCAAAGTTGGCGTTTTATTATTATAGTCAGCTGACGTGTAGTGTATTTATACCCGG | 480 |
|   |     |                                                              |     |
| 2 | 421 | CGGGTCAAAGTTGGCGTTTTATTATTATAGTCAGCTGACGTGTAGTGTATTTATACCCGG | 480 |
|   |     |                                                              |     |
| 1 | 481 | TGAGTTCCTCAAGAGGCCACTCTTGAGTGCCAGCGAGTAGAGTTTTCTCCTCCGAGCCGC | 540 |
|   |     |                                                              |     |
| 2 | 481 | TGAGTTCCTCAAGAGGCCACTCTTGAGTGCCAGCGAGTAGAGTTTTCTCCTCCGAGCCGC | 540 |

|   |      |                                                               |      |
|---|------|---------------------------------------------------------------|------|
| 1 | 541  | TCCGACACCGGGACTGAAAATGAGACATATTATCTGCCACGGAGGTGTTATTACCGAAGA  | 600  |
|   |      |                                                               |      |
| 2 | 541  | TCCGACACCGGGACTGAAAATGAGACATATTATCTGCCACGGAGGTGTTATTACCGAAGA  | 600  |
|   |      |                                                               |      |
| 1 | 601  | AATGGCCGCCAGTCTTTTGGACCAGCTGATCGAAGAGGTACTGGCTGATAATCTTCCACC  | 660  |
|   |      |                                                               |      |
| 2 | 601  | AATGGCCGCCAGTCTTTTGGACCAGCTGATCGAAGAGGTACTGGCTGATAATCTTCCACC  | 660  |
|   |      |                                                               |      |
| 1 | 661  | TCCTAGCCATTTTGAACCACCTACCCTTACGAACTGTATGATTTAGACGTGACGGCCCC   | 720  |
|   |      |                                                               |      |
| 2 | 661  | TCCTAGCCATTTTGAACCACCTACCCTTACGAACTGTATGATTTAGACGTGACGGCCCC   | 720  |
|   |      |                                                               |      |
| 1 | 721  | CGAAGATCCCAACGAGGAGGCGGTTTTCGCAGATTTTTTCCGACTCTGTAATGTTGGCGGT | 780  |
|   |      |                                                               |      |
| 2 | 721  | CGAAGATCCCAACGAGGAGGCGGTTTTCGCAGATTTTTTCCGACTCTGTAATGTTGGCGGT | 780  |
|   |      |                                                               |      |
| 1 | 781  | GCAGGAAGGGATTGACTTACTCACTTTTCCGCCGGCGCCCGGTTCTCCGGAGCCGCCTCA  | 840  |
|   |      |                                                               |      |
| 2 | 781  | GCAGGAAGGGATTGACTTACTCACTTTTCCGCCGGCGCCCGGTTCTCCGGAGCCGCCTCA  | 840  |
|   |      |                                                               |      |
| 1 | 841  | CCTTTCCCGGCAGCCCGAGCAGCCGGAGCAGAGAGCCTTGGGTCCGGTTTCTATGCCAAA  | 900  |
|   |      |                                                               |      |
| 2 | 841  | CCTTTCCCGGCAGCCCGAGCAGCCGGAGCAGAGAGCCTTGGGTCCGGTTTCTATGCCAAA  | 900  |
|   |      |                                                               |      |
| 1 | 901  | CCTTGTACCGGAGGTGATCGATCCACCCAGTGACGACGAGGATGAAGAGGGTGAGGAGTT  | 960  |
|   |      |                                                               |      |
| 2 | 901  | CCTTGTACCGGAGGTGATCGATCCACCCAGTGACGACGAGGATGAAGAGGGTGAGGAGTT  | 960  |
|   |      |                                                               |      |
| 1 | 961  | TGTGTTAGATTATGTGGAGCACCCCGGGCACGGTTGCAGGTCTTGTCATTATCACCGGAG  | 1020 |
|   |      |                                                               |      |
| 2 | 961  | TGTGTTAGATTATGTGGAGCACCCCGGGCACGGTTGCAGGTCTTGTCATTATCACCGGAG  | 1020 |
|   |      |                                                               |      |
| 1 | 1021 | GAATACGGGGACCCAGATATTATGTGTTTCGCTTTGCTATATGAGGACCTGTGGCATGTT  | 1080 |
|   |      |                                                               |      |
| 2 | 1021 | GAATACGGGGACCCAGATATTATGTGTTTCGCTTTGCTATATGAGGACCTGTGGCATGTT  | 1080 |
|   |      |                                                               |      |
| 1 | 1081 | TGTCTACAGTAAGTGAAAATTATGGGCAGTGGGTGATAGAGTGGTGGGTTTGGTGTGGTA  | 1140 |
|   |      |                                                               |      |
| 2 | 1081 | TGTCTACAGTAAGTGAAAATTATGGGCAGTGGGTGATAGAGTGGTGGGTTTGGTGTGGTA  | 1140 |

|   |      |                                                               |      |
|---|------|---------------------------------------------------------------|------|
| 1 | 1141 | ATTTTTTTTTTAAATTTTTACAGTTTTGTGGTTTAAAGAATTTTGTATTGTGATTTTTTTA | 1200 |
|   |      |                                                               |      |
| 2 | 1141 | ATTTTTTTTTTAAATTTTTACAGTTTTGTGGTTTAAAGAATTTTGTATTGTGATTTTTTTA | 1200 |
|   |      |                                                               |      |
| 1 | 1201 | AAAGGTCCTGTGTCTGAACCTGAGCCTGAGCCCGAGCCAGAACC GGAGCCTGCAAGACCT | 1260 |
|   |      |                                                               |      |
| 2 | 1201 | AAAGGTCCTGTGTCTGAACCTGAGCCTGAGCCCGAGCCAGAACC GGAGCCTGCAAGACCT | 1260 |
|   |      |                                                               |      |
| 1 | 1261 | ACCCGCCGTCCTAAAATGGCGCCTGCTATCCTGAGACGCCCGACATCACCTGTGTCTAGA  | 1320 |
|   |      |                                                               |      |
| 2 | 1261 | ACCCGCCGTCCTAAAATGGCGCCTGCTATCCTGAGACGCCCGACATCACCTGTGTCTAGA  | 1320 |
|   |      |                                                               |      |
| 1 | 1321 | GAATGCAATAGTAGTACGGATAGCTGTGACTCCGGTCCTTCTAACACACCTCCTGAGATA  | 1380 |
|   |      |                                                               |      |
| 2 | 1321 | GAATGCAATAGTAGTACGGATAGCTGTGACTCCGGTCCTTCTAACACACCTCCTGAGATA  | 1380 |
|   |      |                                                               |      |
| 1 | 1381 | CACCCGGTGGTCCCGCTGTGCCCATTAACCAGTTGCCGTGAGAGTTGGTGGGCGTCGC    | 1440 |
|   |      |                                                               |      |
| 2 | 1381 | CACCCGGTGGTCCCGCTGTGCCCATTAACCAGTTGCCGTGAGAGTTGGTGGGCGTCGC    | 1440 |
|   |      |                                                               |      |
| 1 | 1441 | CAGGCTGTGGAATGTATCGAGGACTTGCTTAACGAGCCTGGGCAACCTTTGGACTTGAGC  | 1500 |
|   |      |                                                               |      |
| 2 | 1441 | CAGGCTGTGGAATGTATCGAGGACTTGCTTAACGAGCCTGGGCAACCTTTGGACTTGAGC  | 1500 |
|   |      |                                                               |      |
| 1 | 1501 | TGTAAACGCCCCAGGCCATAAGGTGTAAACCTGTGATTGCGTGTGTGGTTAACGCCTTTG  | 1560 |
|   |      |                                                               |      |
| 2 | 1501 | TGTAAACGCCCCAGGCCATAAGGTGTAAACCTGTGATTGCGTGTGTGGTTAACGCCTTTG  | 1560 |
|   |      |                                                               |      |
| 1 | 1561 | TTTGCTGAATGAGTTGATGTAAGTTTAATAAAGGGTGAGATAATGTTTAACTTGCATGGC  | 1620 |
|   |      |                                                               |      |
| 2 | 1561 | TTTGCTGAATGAGTTGATGTAAGTTTAATAAAGGGTGAGATAATGTTTAACTTGCATGGC  | 1620 |
|   |      |                                                               |      |
| 1 | 1621 | GTGTTAAATGGGGCGGGCTTAAAGGGTATATAATGCGCCGTGGGCTAATCCTGGTTACA   | 1680 |
|   |      |                                                               |      |
| 2 | 1621 | GTGTTAAATGGGGCGGGCTTAAAGGGTATATAATGCGCCGTGGGCTAATCCTGGTTACA   | 1680 |
|   |      |                                                               |      |
| 1 | 1681 | TCTGACCTCATGGAGGCTTGGGAGTGTGGGAAGATTTTTCTGCTGTGCGTAACTTGCTG   | 1740 |
|   |      |                                                               |      |
| 2 | 1681 | TCTGACCTCATGGAGGCTTGGGAGTGTGGGAAGATTTTTCTGCTGTGCGTAACTTGCTG   | 1740 |

|   |      |                                                              |      |
|---|------|--------------------------------------------------------------|------|
| 1 | 1741 | GAACAGAGCTCTAACAGTACCTCTTGGTTTTGGAGTTTTCTGTGGGGCTCATCCCAGGCA | 1800 |
|   |      |                                                              |      |
| 2 | 1741 | GAACAGAGCTCTAACAGTACCTCTTGGTTTTGGAGTTTTCTGTGGGGCTCATCCCAGGCA | 1800 |
| 1 | 1801 | AAGTTAGTCTGCAGAATTAAGGAGGATTACAAGTGGGAATTTGAAGAGCTTTTGAAATCC | 1860 |
|   |      |                                                              |      |
| 2 | 1801 | AAGTTAGTCTGCAGAATTAAGGAGGATTACAAGTGGGAATTTGAAGAGCTTTTGAAATCC | 1860 |
| 1 | 1861 | TGTGGTGAGCTGTTTGATTCTTTGAATCTGGGTCACCAGGCGCTTTTCCAAGAGAAGGTC | 1920 |
|   |      |                                                              |      |
| 2 | 1861 | TGTGGTGAGCTGTTTGATTCTTTGAATCTGGGTCACCAGGCGCTTTTCCAAGAGAAGGTC | 1920 |
| 1 | 1921 | ATCAAGACTTTGGATTTTTCCACACCGGGGCGCGCTGCGGCTGCTGTTGCTTTTTTGAGT | 1980 |
|   |      |                                                              |      |
| 2 | 1921 | ATCAAGACTTTGGATTTTTCCACACCGGGGCGCGCTGCGGCTGCTGTTGCTTTTTTGAGT | 1980 |
| 1 | 1981 | TTTATAAAGGATAAATGGAGCGAAGAAACCCATCTGAGCGGGGGGTACCTGCTGGATTTT | 2040 |
|   |      |                                                              |      |
| 2 | 1981 | TTTATAAAGGATAAATGGAGCGAAGAAACCCATCTGAGCGGGGGGTACCTGCTGGATTTT | 2040 |
| 1 | 2041 | CTGGCCATGCATCTGTGGAGAGCGGTTGTGAGACACAAGAATCGCCTGCTACTGTTGTCT | 2100 |
|   |      |                                                              |      |
| 2 | 2041 | CTGGCCATGCATCTGTGGAGAGCGGTTGTGAGACACAAGAATCGCCTGCTACTGTTGTCT | 2100 |
| 1 | 2101 | TCCGTCCGCCCGGCGATAATACCGACGGAGGAGCAGCAGCAGCAGCAGGAGGAAGCCAGG | 2160 |
|   |      |                                                              |      |
| 2 | 2101 | TCCGTCCGCCCGGCGATAATACCGACGGAGGAGCAGCAGCAGCAGCAGGAGGAAGCCAGG | 2160 |
| 1 | 2161 | CGGCGGCGGCAGGAGCAGAGCCCATGGAACCCGAGAGCCGGCCTGGACCCTCGGGAATGA | 2220 |
|   |      |                                                              |      |
| 2 | 2161 | CGGCGGCGGCAGGAGCAGAGCCCATGGAACCCGAGAGCCGGCCTGGACCCTCGGGAATGA | 2220 |
| 1 | 2221 | ATGTTGTACAGGTGGCTGAACTGTATCCAGAACTGAGACGCATTTTGACAATTACAGAGG | 2280 |
|   |      |                                                              |      |
| 2 | 2221 | ATGTTGTACAGGTGGCTGAACTGTATCCAGAACTGAGACGCATTTTGACAATTACAGAGG | 2280 |
| 1 | 2281 | ATGGGCAGGGGCTAAAGGGGGTAAAGAGGGAGCGGGGGGCTTGTGAGGCTACAGAGGAGG | 2340 |
|   |      |                                                              |      |
| 2 | 2281 | ATGGGCAGGGGCTAAAGGGGGTAAAGAGGGAGCGGGGGGCTTGTGAGGCTACAGAGGAGG | 2340 |

|   |      |                                                               |      |
|---|------|---------------------------------------------------------------|------|
| 1 | 2341 | CTAGGAATCTAGCTTTTAGCTTAATGACCAGACACCGTCCTGAGTGTATTACTTTTCAAC  | 2400 |
|   |      |                                                               |      |
| 2 | 2341 | CTAGGAATCTAGCTTTTAGCTTAATGACCAGACACCGTCCTGAGTGTATTACTTTTCAAC  | 2400 |
|   |      |                                                               |      |
| 1 | 2401 | AGATCAAGGATAATTGCGCTAATGAGCTTGATCTGCTGGCGCAGAAGTATTCCATAGAGC  | 2460 |
|   |      |                                                               |      |
| 2 | 2401 | AGATCAAGGATAATTGCGCTAATGAGCTTGATCTGCTGGCGCAGAAGTATTCCATAGAGC  | 2460 |
|   |      |                                                               |      |
| 1 | 2461 | AGCTGACCACTTACTGGCTGCAGCCAGGGGATGATTTTGAGGAGGCTATTAGGGTATATG  | 2520 |
|   |      |                                                               |      |
| 2 | 2461 | AGCTGACCACTTACTGGCTGCAGCCAGGGGATGATTTTGAGGAGGCTATTAGGGTATATG  | 2520 |
|   |      |                                                               |      |
| 1 | 2521 | CAAAGGTGGCACTTAGGCCAGATTGCAAGTACAAGATCAGCAAACCTTGTAATATCAGGA  | 2580 |
|   |      |                                                               |      |
| 2 | 2521 | CAAAGGTGGCACTTAGGCCAGATTGCAAGTACAAGATCAGCAAACCTTGTAATATCAGGA  | 2580 |
|   |      |                                                               |      |
| 1 | 2581 | ATTGTTGCTACATTTCTGGGAACGGGGCCGAGGTGGAGATAGATACGGAGGATAGGGTGG  | 2640 |
|   |      |                                                               |      |
| 2 | 2581 | ATTGTTGCTACATTTCTGGGAACGGGGCCGAGGTGGAGATAGATACGGAGGATAGGGTGG  | 2640 |
|   |      |                                                               |      |
| 1 | 2641 | CCTTTAGATGTAGCATGATAAATATGTGGCCGGGGGTGCTTGGCATGGACGGGGTGGTTA  | 2700 |
|   |      |                                                               |      |
| 2 | 2641 | CCTTTAGATGTAGCATGATAAATATGTGGCCGGGGGTGCTTGGCATGGACGGGGTGGTTA  | 2700 |
|   |      |                                                               |      |
| 1 | 2701 | TTATGAATGTAAGGTTTACTGGCCCAATTTTAGCGGTACGGTTTTCTGGCCAATACCA    | 2760 |
|   |      |                                                               |      |
| 2 | 2701 | TTATGAATGTAAGGTTTACTGGCCCAATTTTAGCGGTACGGTTTTCTGGCCAATACCA    | 2760 |
|   |      |                                                               |      |
| 1 | 2761 | ACCTTATCCTACACGGTGTAAGCTTCTATGGGTTTAAACAATACCTGTGTGGAAGCCTGGA | 2820 |
|   |      |                                                               |      |
| 2 | 2761 | ACCTTATCCTACACGGTGTAAGCTTCTATGGGTTTAAACAATACCTGTGTGGAAGCCTGGA | 2820 |
|   |      |                                                               |      |
| 1 | 2821 | CCGATGTAAGGTTTCGGGGCTGTGCCTTTTACTGCTGCTGGAAGGGGGTGGTGTGTCGCC  | 2880 |
|   |      |                                                               |      |
| 2 | 2821 | CCGATGTAAGGTTTCGGGGCTGTGCCTTTTACTGCTGCTGGAAGGGGGTGGTGTGTCGCC  | 2880 |
|   |      |                                                               |      |
| 1 | 2881 | CAAAAGCAGGGCTTCAATTAAGAAATGCCTCTTTGAAAGGTGTACCTTGGGTATCCTGT   | 2940 |
|   |      |                                                               |      |
| 2 | 2881 | CAAAAGCAGGGCTTCAATTAAGAAATGCCTCTTTGAAAGGTGTACCTTGGGTATCCTGT   | 2940 |

|   |      |                                                                |      |
|---|------|----------------------------------------------------------------|------|
| 1 | 2941 | CTGAGGGTAACTCCAGGGTGCGCCACAATGTGGCCTCCGACTGTGGTTGCTTCATGCTAG   | 3000 |
|   |      |                                                                |      |
| 2 | 2941 | CTGAGGGTAACTCCAGGGTGCGCCACAATGTGGCCTCCGACTGTGGTTGCTTCATGCTAG   | 3000 |
| 1 | 3001 | TGAAAAGCGTGGCTGTGATTAAGCATAACATGGTATGTGGCAACTGCGAGGACAGGGCCT   | 3060 |
|   |      |                                                                |      |
| 2 | 3001 | TGAAAAGCGTGGCTGTGATTAAGCATAACATGGTATGTGGCAACTGCGAGGACAGGGCCT   | 3060 |
| 1 | 3061 | CTCAGATGCTGACCTGCTCGGACGGCAACTGTCACCTGCTGAAGACCATTACGTAGCCA    | 3120 |
|   |      |                                                                |      |
| 2 | 3061 | CTCAGATGCTGACCTGCTCGGACGGCAACTGTCACCTGCTGAAGACCATTACGTAGCCA    | 3120 |
| 1 | 3121 | GCCACTCTCGCAAGGCCTGGCCAGTGTTTGAGCATAACATACTGACCCGCTGTTCTTGC    | 3180 |
|   |      |                                                                |      |
| 2 | 3121 | GCCACTCTCGCAAGGCCTGGCCAGTGTTTGAGCATAACATACTGACCCGCTGTTCTTGC    | 3180 |
| 1 | 3181 | ATTTGGGTAACAGGAGGGGGGTGTTCTACCTTACCAATGCAATTTGAGTCACACTAAGA    | 3240 |
|   |      |                                                                |      |
| 2 | 3181 | ATTTGGGTAACAGGAGGGGGGTGTTCTACCTTACCAATGCAATTTGAGTCACACTAAGA    | 3240 |
| 1 | 3241 | TATTGCTTGAGCCCGAGAGCATGTCCAAGGTGAACCTGAACGGGGTGTTTGACATGACCA   | 3300 |
|   |      |                                                                |      |
| 2 | 3241 | TATTGCTTGAGCCCGAGAGCATGTCCAAGGTGAACCTGAACGGGGTGTTTGACATGACCA   | 3300 |
| 1 | 3301 | TGAAGATCTGGAAGGTGCTGAGGTACGATGAGACCCGCACCAGGTGCAGACCCTGCGAGT   | 3360 |
|   |      |                                                                |      |
| 2 | 3301 | TGAAGATCTGGAAGGTGCTGAGGTACGATGAGACCCGCACCAGGTGCAGACCCTGCGAGT   | 3360 |
| 1 | 3361 | GTGGCGGTAAACATATTAGGAACCAGCCTGTGATGCTGGATGTGACCGAGGAGCTGAGGC   | 3420 |
|   |      |                                                                |      |
| 2 | 3361 | GTGGCGGTAAACATATTAGGAACCAGCCTGTGATGCTGGATGTGACCGAGGAGCTGAGGC   | 3420 |
| 1 | 3421 | CCGATCACTTGGTGTGCTGGCCTGCACCCGCGCTGAGTTTGGCTCTAGCGATGAAGATACAG | 3480 |
|   |      |                                                                |      |
| 2 | 3421 | CCGATCACTTGGTGTGCTGGCCTGCACCCGCGCTGAGTTTGGCTCTAGCGATGAAGATACAG | 3480 |
| 1 | 3481 | ATTGAGGTAAGTAAATGTGTGGGCGTGGCTTAAGGGTGGGAAAGAATATATAAGGTGGGG   | 3540 |
|   |      |                                                                |      |
| 2 | 3481 | ATTGAGGTAAGTAAATGTGTGGGCGTGGCTTAAGGGTGGGAAAGAATATATAAGGTGGGG   | 3540 |

|   |      |                                                               |      |
|---|------|---------------------------------------------------------------|------|
| 1 | 3541 | GTCTTATGTAGTTTTGTATCTGTTTTGCAGCAGCCGCCGCCCATGAGCACCAACTCGT    | 3600 |
|   |      |                                                               |      |
| 2 | 3541 | GTCTTATGTAGTTTTGTATCTGTTTTGCAGCAGCCGCCGCCCATGAGCACCAACTCGT    | 3600 |
|   |      |                                                               |      |
| 1 | 3601 | TTGATGGAAGCATTGTGAGCTCATATTTGACAACGCGCATGCCCCCATGGGCGGGGTGC   | 3660 |
|   |      |                                                               |      |
| 2 | 3601 | TTGATGGAAGCATTGTGAGCTCATATTTGACAACGCGCATGCCCCCATGGGCGGGGTGC   | 3660 |
|   |      |                                                               |      |
| 1 | 3661 | GTCAGAATGTGATGGGCTCCAGCATTGATGGTCGCCCGTCCTGCCCGCAAACCTCTACTA  | 3720 |
|   |      |                                                               |      |
| 2 | 3661 | GTCAGAATGTGATGGGCTCCAGCATTGATGGTCGCCCGTCCTGCCCGCAAACCTCTACTA  | 3720 |
|   |      |                                                               |      |
| 1 | 3721 | CCTTGACCTACGAGACCGTGTCTGGAACGCCGTTGGAGACTGCAGCCTCCGCCGCCGCTT  | 3780 |
|   |      |                                                               |      |
| 2 | 3721 | CCTTGACCTACGAGACCGTGTCTGGAACGCCGTTGGAGACTGCAGCCTCCGCCGCCGCTT  | 3780 |
|   |      |                                                               |      |
| 1 | 3781 | CAGCCGCTGCAGCCACCGCCCGGGGATTGTGACTGACTTTGCTTTCCTGAGCCCGCTTG   | 3840 |
|   |      |                                                               |      |
| 2 | 3781 | CAGCCGCTGCAGCCACCGCCCGGGGATTGTGACTGACTTTGCTTTCCTGAGCCCGCTTG   | 3840 |
|   |      |                                                               |      |
| 1 | 3841 | CAAGCAGTGCAGCTTCCCGTTCATCCGCCCGCGATGACAAGTTGACGGCTCTTTTGGCAC  | 3900 |
|   |      |                                                               |      |
| 2 | 3841 | CAAGCAGTGCAGCTTCCCGTTCATCCGCCCGCGATGACAAGTTGACGGCTCTTTTGGCAC  | 3900 |
|   |      |                                                               |      |
| 1 | 3901 | AATTGGATTCTTTGACCCGGGAACCTTAATGTCGTTTCTCAGCAGCTGTTGGATCTGCGCC | 3960 |
|   |      |                                                               |      |
| 2 | 3901 | AATTGGATTCTTTGACCCGGGAACCTTAATGTCGTTTCTCAGCAGCTGTTGGATCTGCGCC | 3960 |
|   |      |                                                               |      |
| 1 | 3961 | AGCAGGTTTCTGCCCTGAAGGCTTCCCTCCCCTCCCAATGCGGTTTAAAACATAAATAAAA | 4020 |
|   |      |                                                               |      |
| 2 | 3961 | AGCAGGTTTCTGCCCTGAAGGCTTCCCTCCCCTCCCAATGCGGTTTAAAACATAAATAAAA | 4020 |
|   |      |                                                               |      |
| 1 | 4021 | AACCAGACTCTGTTTGGATTTGGATCAAGCAAGTGTCTTGCTGTCTTTATTTAGGGGTTT  | 4080 |
|   |      |                                                               |      |
| 2 | 4021 | AACCAGACTCTGTTTGGATTTGGATCAAGCAAGTGTCTTGCTGTCTTTATTTAGGGGTTT  | 4080 |
|   |      |                                                               |      |
| 1 | 4081 | TGCGCGCGCGGTAGGCCCGGGACCAGCGGTCTCGGTGCTTGAGGGTCCTGTGTATTTTTT  | 4140 |
|   |      |                                                               |      |
| 2 | 4081 | TGCGCGCGCGGTAGGCCCGGGACCAGCGGTCTCGGTGCTTGAGGGTCCTGTGTATTTTTT  | 4140 |

|   |      |                                                               |      |
|---|------|---------------------------------------------------------------|------|
| 1 | 4141 | CCAGGACGTGGTAAAGGTGACTCTGGATGTTTCAGATACATGGGCATAAGCCCGTCTCTGG | 4200 |
|   |      |                                                               |      |
| 2 | 4141 | CCAGGACGTGGTAAAGGTGACTCTGGATGTTTCAGATACATGGGCATAAGCCCGTCTCTGG | 4200 |
|   |      |                                                               |      |
| 1 | 4201 | GGTGGAGGTAGCACCACTGCAGAGCTTCATGCTGCGGGGTGGTGTGTAGATGATCCAGT   | 4260 |
|   |      |                                                               |      |
| 2 | 4201 | GGTGGAGGTAGCACCACTGCAGAGCTTCATGCTGCGGGGTGGTGTGTAGATGATCCAGT   | 4260 |
|   |      |                                                               |      |
| 1 | 4261 | CGTAGCAGGAGCGCTGGGCGTGGTGCCTAAAAATGTCTTTCAGTAGCAAGCTGATTGCCA  | 4320 |
|   |      |                                                               |      |
| 2 | 4261 | CGTAGCAGGAGCGCTGGGCGTGGTGCCTAAAAATGTCTTTCAGTAGCAAGCTGATTGCCA  | 4320 |
|   |      |                                                               |      |
| 1 | 4321 | GGGGCAGGCCCTTGGTGTAAGTGTTTACAAAGCGGTTAAGCTGGGATGGGTGCATACGTG  | 4380 |
|   |      |                                                               |      |
| 2 | 4321 | GGGGCAGGCCCTTGGTGTAAGTGTTTACAAAGCGGTTAAGCTGGGATGGGTGCATACGTG  | 4380 |
|   |      |                                                               |      |
| 1 | 4381 | GGGATATGAGATGCATCTTGGACTGTATTTTTAGGTTGGCTATGTTCCCAGCCATATCCC  | 4440 |
|   |      |                                                               |      |
| 2 | 4381 | GGGATATGAGATGCATCTTGGACTGTATTTTTAGGTTGGCTATGTTCCCAGCCATATCCC  | 4440 |
|   |      |                                                               |      |
| 1 | 4441 | TCCGGGGATTCATGTTGTGCAGAACCACCAGCACAGTGTATCCGGTGCACCTGGGAAATT  | 4500 |
|   |      |                                                               |      |
| 2 | 4441 | TCCGGGGATTCATGTTGTGCAGAACCACCAGCACAGTGTATCCGGTGCACCTGGGAAATT  | 4500 |
|   |      |                                                               |      |
| 1 | 4501 | TGTCATGTAGCTTAGAAGGAAATGCGTGGAAGAAGTTGGAGACGCCCTTGTGACCTCCAA  | 4560 |
|   |      |                                                               |      |
| 2 | 4501 | TGTCATGTAGCTTAGAAGGAAATGCGTGGAAGAAGTTGGAGACGCCCTTGTGACCTCCAA  | 4560 |
|   |      |                                                               |      |
| 1 | 4561 | GATTTTCCATGCATTCGTCCATAATGATGGCAATGGGCCACGGGCGGCCTGGGCGA      | 4620 |
|   |      |                                                               |      |
| 2 | 4561 | GATTTTCCATGCATTCGTCCATAATGATGGCAATGGGCCACGGGCGGCCTGGGCGA      | 4620 |
|   |      |                                                               |      |
| 1 | 4621 | AGATATTTCTGGGATCACTAACGTCATAGTTGTGTTCCAGGATGAGATCGTCATAGGCCA  | 4680 |
|   |      |                                                               |      |
| 2 | 4621 | AGATATTTCTGGGATCACTAACGTCATAGTTGTGTTCCAGGATGAGATCGTCATAGGCCA  | 4680 |
|   |      |                                                               |      |
| 1 | 4681 | TTTTTACAAAGCGCGGGCGGAGGGTGCCAGACTGCGGTATAATGGTTCCATCCGGCCCAG  | 4740 |
|   |      |                                                               |      |
| 2 | 4681 | TTTTTACAAAGCGCGGGCGGAGGGTGCCAGACTGCGGTATAATGGTTCCATCCGGCCCAG  | 4740 |



|   |      |                                                              |      |
|---|------|--------------------------------------------------------------|------|
| 1 | 4741 | GGGCGTAGTTACCCTCACAGATTTGCATTTCCACGCTTTGAGTTCAGATGGGGGGATCA  | 4800 |
|   |      |                                                              |      |
| 2 | 4741 | GGGCGTAGTTACCCTCACAGATTTGCATTTCCACGCTTTGAGTTCAGATGGGGGGATCA  | 4800 |
|   |      |                                                              |      |
| 1 | 4801 | TGTCTACCTGCGGGGCGATGAAGAAAACGGTTTCCGGGGTAGGGGAGATCAGCTGGGAAG | 4860 |
|   |      |                                                              |      |
| 2 | 4801 | TGTCTACCTGCGGGGCGATGAAGAAAACGGTTTCCGGGGTAGGGGAGATCAGCTGGGAAG | 4860 |
|   |      |                                                              |      |
| 1 | 4861 | AAAGCAGGTTCTGAGCAGCTGCGACTTACCGCAGCCGGTGGGCCCGTAAATCACACCTA  | 4920 |
|   |      |                                                              |      |
| 2 | 4861 | AAAGCAGGTTCTGAGCAGCTGCGACTTACCGCAGCCGGTGGGCCCGTAAATCACACCTA  | 4920 |
|   |      |                                                              |      |
| 1 | 4921 | TTACCGGCTGCAACTGGTAGTTAAGAGAGCTGCAGCTGCCGTCATCCCTGAGCAGGGGGG | 4980 |
|   |      |                                                              |      |
| 2 | 4921 | TTACCGGCTGCAACTGGTAGTTAAGAGAGCTGCAGCTGCCGTCATCCCTGAGCAGGGGGG | 4980 |
|   |      |                                                              |      |
| 1 | 4981 | CCACTTCGTTAAGCATGTCCCTGACTCGCATGTTTTCCCTGACCAAATCCGCCAGAAGGC | 5040 |
|   |      |                                                              |      |
| 2 | 4981 | CCACTTCGTTAAGCATGTCCCTGACTCGCATGTTTTCCCTGACCAAATCCGCCAGAAGGC | 5040 |
|   |      |                                                              |      |
| 1 | 5041 | GCTCGCCGCCAGCGATAGCAGTTCTTGCAAGGAAGCAAAGTTTTTCAACGGTTTGAGAC  | 5100 |
|   |      |                                                              |      |
| 2 | 5041 | GCTCGCCGCCAGCGATAGCAGTTCTTGCAAGGAAGCAAAGTTTTTCAACGGTTTGAGAC  | 5100 |
|   |      |                                                              |      |
| 1 | 5101 | CGTCCGCCGTAGGCATGCTTTTGAGCGTTTGACCAAGCAGTTCCAGGCGGTCCCACAGCT | 5160 |
|   |      |                                                              |      |
| 2 | 5101 | CGTCCGCCGTAGGCATGCTTTTGAGCGTTTGACCAAGCAGTTCCAGGCGGTCCCACAGCT | 5160 |
|   |      |                                                              |      |
| 1 | 5161 | CGGTCACCTGCTCTACGGCATCTCGATCCAGCATATCTCCTCGTTTTGCGGGTTGGGGCG | 5220 |
|   |      |                                                              |      |
| 2 | 5161 | CGGTCACCTGCTCTACGGCATCTCGATCCAGCATATCTCCTCGTTTTGCGGGTTGGGGCG | 5220 |
|   |      |                                                              |      |
| 1 | 5221 | GCTTTGCTGTACGGCAGTAGTCGGTGCTCGTCCAGACGGGCCAGGGTCATGTCTTTCCA  | 5280 |
|   |      |                                                              |      |
| 2 | 5221 | GCTTTGCTGTACGGCAGTAGTCGGTGCTCGTCCAGACGGGCCAGGGTCATGTCTTTCCA  | 5280 |
|   |      |                                                              |      |
| 1 | 5281 | CGGGCGCAGGGTCCTCGTCAGCGTAGTCTGGGTACGGTGAAGGGGTGCGCTCCGGGCTG  | 5340 |
|   |      |                                                              |      |
| 2 | 5281 | CGGGCGCAGGGTCCTCGTCAGCGTAGTCTGGGTACGGTGAAGGGGTGCGCTCCGGGCTG  | 5340 |

|   |      |                                                               |      |
|---|------|---------------------------------------------------------------|------|
| 1 | 5341 | CGCGCTGGCCAGGGTGCCTTGAGGCTGGTCCTGCTGGTGCTGAAGCGCTGCCGGTCTTC   | 5400 |
|   |      |                                                               |      |
| 2 | 5341 | CGCGCTGGCCAGGGTGCCTTGAGGCTGGTCCTGCTGGTGCTGAAGCGCTGCCGGTCTTC   | 5400 |
| 1 | 5401 | GCCCTGCGCGTCGGCCAGGTAGCATTGACCATGGTGTCATAGTCCAGCCCCTCCGCGGC   | 5460 |
|   |      |                                                               |      |
| 2 | 5401 | GCCCTGCGCGTCGGCCAGGTAGCATTGACCATGGTGTCATAGTCCAGCCCCTCCGCGGC   | 5460 |
| 1 | 5461 | GTGGCCCTTGGCGCGCAGCTTGCCCTTGGAGGAGGCGCCGCACGAGGGGCAGTGCAGACT  | 5520 |
|   |      |                                                               |      |
| 2 | 5461 | GTGGCCCTTGGCGCGCAGCTTGCCCTTGGAGGAGGCGCCGCACGAGGGGCAGTGCAGACT  | 5520 |
| 1 | 5521 | TTTGAGGGCGTAGAGCTTGGGCGCGAGAAATACCGATTCCGGGGAGTAGGCATCCGCGCC  | 5580 |
|   |      |                                                               |      |
| 2 | 5521 | TTTGAGGGCGTAGAGCTTGGGCGCGAGAAATACCGATTCCGGGGAGTAGGCATCCGCGCC  | 5580 |
| 1 | 5581 | GCAGGCCCGCAGACGGTCTCGCATTCCACGAGCCAGGTGAGCTCTGGCCGTTCCGGGGTC  | 5640 |
|   |      |                                                               |      |
| 2 | 5581 | GCAGGCCCGCAGACGGTCTCGCATTCCACGAGCCAGGTGAGCTCTGGCCGTTCCGGGGTC  | 5640 |
| 1 | 5641 | AAAAACCAGGTTTCCCCCATGCTTTTTGATGCGTTTCTTACCTCTGGTTTTCCATGAGCCG | 5700 |
|   |      |                                                               |      |
| 2 | 5641 | AAAAACCAGGTTTCCCCCATGCTTTTTGATGCGTTTCTTACCTCTGGTTTTCCATGAGCCG | 5700 |
| 1 | 5701 | GTGTCCACGCTCGGTGACGAAAAGGCTGTCCGTGTCCCCGTATACAGACTTGAGAGGCCT  | 5760 |
|   |      |                                                               |      |
| 2 | 5701 | GTGTCCACGCTCGGTGACGAAAAGGCTGTCCGTGTCCCCGTATACAGACTTGAGAGGCCT  | 5760 |
| 1 | 5761 | GTCTCGAGCGGTGTTCCGCGGTCCTCCTCGTATAGAACTCGGACCACTCTGAGACAAA    | 5820 |
|   |      |                                                               |      |
| 2 | 5761 | GTCTCGAGCGGTGTTCCGCGGTCCTCCTCGTATAGAACTCGGACCACTCTGAGACAAA    | 5820 |
| 1 | 5821 | GGCTCGCGTCCAGGCCAGCACGAAGGAGGCTAAGTGGGAGGGGTAGCGGTCGTTGTCCAC  | 5880 |
|   |      |                                                               |      |
| 2 | 5821 | GGCTCGCGTCCAGGCCAGCACGAAGGAGGCTAAGTGGGAGGGGTAGCGGTCGTTGTCCAC  | 5880 |
| 1 | 5881 | TAGGGGGTCCACTCGCTCCAGGGTGTGAAGACACATGTGCGCCTCTTCGGCATCAAGGAA  | 5940 |
|   |      |                                                               |      |
| 2 | 5881 | TAGGGGGTCCACTCGCTCCAGGGTGTGAAGACACATGTGCGCCTCTTCGGCATCAAGGAA  | 5940 |

|   |      |                                                               |      |
|---|------|---------------------------------------------------------------|------|
| 1 | 5941 | GGTGATTGGTTTTGTAGGTGTAGGCCACGTGACCGGGTGTTCCTGAAGGGGGGCTATAAAA | 6000 |
|   |      |                                                               |      |
| 2 | 5941 | GGTGATTGGTTTTGTAGGTGTAGGCCACGTGACCGGGTGTTCCTGAAGGGGGGCTATAAAA | 6000 |
|   |      |                                                               |      |
| 1 | 6001 | GGGGGTGGGGGCGCGTTCGTCTCACTCTCTTCCGCATCGCTGTCTGCGAGGGCCAGCTG   | 6060 |
|   |      |                                                               |      |
| 2 | 6001 | GGGGGTGGGGGCGCGTTCGTCTCACTCTCTTCCGCATCGCTGTCTGCGAGGGCCAGCTG   | 6060 |
|   |      |                                                               |      |
| 1 | 6061 | TTGGGGTGAGTACTCCCTCTGAAAAGCGGGCATGACTTCTGCGCTAAGATTGTCAGTTTC  | 6120 |
|   |      |                                                               |      |
| 2 | 6061 | TTGGGGTGAGTACTCCCTCTGAAAAGCGGGCATGACTTCTGCGCTAAGATTGTCAGTTTC  | 6120 |
|   |      |                                                               |      |
| 1 | 6121 | CAAAAACGAGGAGGATTTGATATTCACCTGGCCCGCGGTGATGCCTTTGAGGGTGGCCGC  | 6180 |
|   |      |                                                               |      |
| 2 | 6121 | CAAAAACGAGGAGGATTTGATATTCACCTGGCCCGCGGTGATGCCTTTGAGGGTGGCCGC  | 6180 |
|   |      |                                                               |      |
| 1 | 6181 | ATCCATCTGGTCAGAAAAGACAATCTTTTTGTTGTCAAGCTTGGTGGCAAACGACCCGTA  | 6240 |
|   |      |                                                               |      |
| 2 | 6181 | ATCCATCTGGTCAGAAAAGACAATCTTTTTGTTGTCAAGCTTGGTGGCAAACGACCCGTA  | 6240 |
|   |      |                                                               |      |
| 1 | 6241 | GAGGGCGTTGGACAGCAACTTGGCGATGGAGCGCAGGGTTTGGTTTTTGTGCGGATCGGC  | 6300 |
|   |      |                                                               |      |
| 2 | 6241 | GAGGGCGTTGGACAGCAACTTGGCGATGGAGCGCAGGGTTTGGTTTTTGTGCGGATCGGC  | 6300 |
|   |      |                                                               |      |
| 1 | 6301 | GCGCTCCTTGGCCGCGATGTTTAGCTGCACGTATTCGCGCGCAACGCACCGCCATTCGGG  | 6360 |
|   |      |                                                               |      |
| 2 | 6301 | GCGCTCCTTGGCCGCGATGTTTAGCTGCACGTATTCGCGCGCAACGCACCGCCATTCGGG  | 6360 |
|   |      |                                                               |      |
| 1 | 6361 | AAAGACGGTGGTGCCTCGTCGGGCACCAAGGTGCACGCGCCAACCGCGGTGTCAGGGT    | 6420 |
|   |      |                                                               |      |
| 2 | 6361 | AAAGACGGTGGTGCCTCGTCGGGCACCAAGGTGCACGCGCCAACCGCGGTGTCAGGGT    | 6420 |
|   |      |                                                               |      |
| 1 | 6421 | GACAAGGTCAACGCTGGTGGCTACCTCTCCGCGTAGGCGCTCGTTGGTCCAGCAGAGGCG  | 6480 |
|   |      |                                                               |      |
| 2 | 6421 | GACAAGGTCAACGCTGGTGGCTACCTCTCCGCGTAGGCGCTCGTTGGTCCAGCAGAGGCG  | 6480 |
|   |      |                                                               |      |
| 1 | 6481 | GCCGCCCTTGCAGCAGCAGAATGGCGGTAGGGGGTCTAGCTGCGTCTCGTCCGGGGGGTCT | 6540 |
|   |      |                                                               |      |
| 2 | 6481 | GCCGCCCTTGCAGCAGCAGAATGGCGGTAGGGGGTCTAGCTGCGTCTCGTCCGGGGGGTCT | 6540 |

|   |      |                                                               |      |
|---|------|---------------------------------------------------------------|------|
| 1 | 6541 | TGCGTCCACGGTAAAGACCCCGGGCAGCAGGCGCGCGTTCGAAGTAGTCTATCTTGCATCC | 6600 |
|   |      |                                                               |      |
| 2 | 6541 | TGCGTCCACGGTAAAGACCCCGGGCAGCAGGCGCGCGTTCGAAGTAGTCTATCTTGCATCC | 6600 |
| 1 | 6601 | TTGCAAGTCTAGCGCCTGCTGCCATGCGCGGGCGGCAAGCGCGCGCTCGTATGGGTTGAG  | 6660 |
|   |      |                                                               |      |
| 2 | 6601 | TTGCAAGTCTAGCGCCTGCTGCCATGCGCGGGCGGCAAGCGCGCGCTCGTATGGGTTGAG  | 6660 |
| 1 | 6661 | TGGGGGACCCCATGGCATGGGGTGGGTGAGCGCGGAGGCGTACATGCCGCAAATGTCGTA  | 6720 |
|   |      |                                                               |      |
| 2 | 6661 | TGGGGGACCCCATGGCATGGGGTGGGTGAGCGCGGAGGCGTACATGCCGCAAATGTCGTA  | 6720 |
| 1 | 6721 | AACGTAGAGGGGCTCTCTGAGTATTCCAAGATATGTAGGGTAGCATCTTCCACCGCGGAT  | 6780 |
|   |      |                                                               |      |
| 2 | 6721 | AACGTAGAGGGGCTCTCTGAGTATTCCAAGATATGTAGGGTAGCATCTTCCACCGCGGAT  | 6780 |
| 1 | 6781 | GCTGGCGCGCACGTAATCGTATAGTTTCGTGCGAGGGAGCGAGGAGGTCGGGACCGAGGTT | 6840 |
|   |      |                                                               |      |
| 2 | 6781 | GCTGGCGCGCACGTAATCGTATAGTTTCGTGCGAGGGAGCGAGGAGGTCGGGACCGAGGTT | 6840 |
| 1 | 6841 | GCTACGGGCGGGCTGCTCTGCTCGGAAGACTATCTGCCTGAAGATGGCATGTGAGTTGGA  | 6900 |
|   |      |                                                               |      |
| 2 | 6841 | GCTACGGGCGGGCTGCTCTGCTCGGAAGACTATCTGCCTGAAGATGGCATGTGAGTTGGA  | 6900 |
| 1 | 6901 | TGATATGGTTGGACGCTGGAAGACGTTGAAGCTGGCGTCTGTGAGACCTACCGCGTCACG  | 6960 |
|   |      |                                                               |      |
| 2 | 6901 | TGATATGGTTGGACGCTGGAAGACGTTGAAGCTGGCGTCTGTGAGACCTACCGCGTCACG  | 6960 |
| 1 | 6961 | CACGAAGGAGGCGTAGGAGTCGCGCAGCTTGTTGACCAGCTCGGCGGTGACCTGCACGTC  | 7020 |
|   |      |                                                               |      |
| 2 | 6961 | CACGAAGGAGGCGTAGGAGTCGCGCAGCTTGTTGACCAGCTCGGCGGTGACCTGCACGTC  | 7020 |
| 1 | 7021 | TAGGGCGCAGTAGTCCAGGGTTTCCTTGATGATGTCATACTTATCCTGTCCCTTTTTTTT  | 7080 |
|   |      |                                                               |      |
| 2 | 7021 | TAGGGCGCAGTAGTCCAGGGTTTCCTTGATGATGTCATACTTATCCTGTCCCTTTTTTTT  | 7080 |
| 1 | 7081 | CCACAGCTCGCGGTTGAGGACAAACTCTTCGCGGTCTTTCCAGTACTCTTGGATCGGAAA  | 7140 |
|   |      |                                                               |      |
| 2 | 7081 | CCACAGCTCGCGGTTGAGGACAAACTCTTCGCGGTCTTTCCAGTACTCTTGGATCGGAAA  | 7140 |

|   |      |                                                              |      |
|---|------|--------------------------------------------------------------|------|
| 1 | 7141 | CCCGTCGGCCTCCGAACGGTAAGAGCCTAGCATGTAGAAGTGGTTGACGGCCTGGTAGGC | 7200 |
|   |      |                                                              |      |
| 2 | 7141 | CCCGTCGGCCTCCGAACGGTAAGAGCCTAGCATGTAGAAGTGGTTGACGGCCTGGTAGGC | 7200 |
|   |      |                                                              |      |
| 1 | 7201 | GCAGCATCCCTTTTCTACGGGTAGCGCGTATGCCTGCGCGGCCTTCCGGAGCGAGGTGTG | 7260 |
|   |      |                                                              |      |
| 2 | 7201 | GCAGCATCCCTTTTCTACGGGTAGCGCGTATGCCTGCGCGGCCTTCCGGAGCGAGGTGTG | 7260 |
|   |      |                                                              |      |
| 1 | 7261 | GGTGAGCGCAAAGGTGTCCCTGACCATGACTTTGAGGTACTGGTATTTGAAGTCAGTGTC | 7320 |
|   |      |                                                              |      |
| 2 | 7261 | GGTGAGCGCAAAGGTGTCCCTGACCATGACTTTGAGGTACTGGTATTTGAAGTCAGTGTC | 7320 |
|   |      |                                                              |      |
| 1 | 7321 | GTCGCATCCGCCCTGCTCCAGAGCAAAAAGTCCGTGCGCTTTTTGGAACGCGGATTTGG  | 7380 |
|   |      |                                                              |      |
| 2 | 7321 | GTCGCATCCGCCCTGCTCCAGAGCAAAAAGTCCGTGCGCTTTTTGGAACGCGGATTTGG  | 7380 |
|   |      |                                                              |      |
| 1 | 7381 | CAGGGCGAAGGTGACATCGTTGAAGAGTATCTTTCCGCGCGAGGCATAAAGTTGCGTGT  | 7440 |
|   |      |                                                              |      |
| 2 | 7381 | CAGGGCGAAGGTGACATCGTTGAAGAGTATCTTTCCGCGCGAGGCATAAAGTTGCGTGT  | 7440 |
|   |      |                                                              |      |
| 1 | 7441 | GATGCGGAAGGGTCCCGGCACCTCGGAACGGTTGTTAATTACCTGGGCGGCGAGCACGAT | 7500 |
|   |      |                                                              |      |
| 2 | 7441 | GATGCGGAAGGGTCCCGGCACCTCGGAACGGTTGTTAATTACCTGGGCGGCGAGCACGAT | 7500 |
|   |      |                                                              |      |
| 1 | 7501 | CTCGTCAAAGCCGTTGATGTTGTGGCCACAATGTAAAGTTCCAAGAAGCGCGGGATGCC  | 7560 |
|   |      |                                                              |      |
| 2 | 7501 | CTCGTCAAAGCCGTTGATGTTGTGGCCACAATGTAAAGTTCCAAGAAGCGCGGGATGCC  | 7560 |
|   |      |                                                              |      |
| 1 | 7561 | CTTGATGGAAGGCAATTTTTTAAGTTCCTCGTAGGTGAGCTCTTCAGGGGAGCTGAGCCC | 7620 |
|   |      |                                                              |      |
| 2 | 7561 | CTTGATGGAAGGCAATTTTTTAAGTTCCTCGTAGGTGAGCTCTTCAGGGGAGCTGAGCCC | 7620 |
|   |      |                                                              |      |
| 1 | 7621 | GTGCTCTGAAAGGGCCAGTCTGCAAGATGAGGGTTGGAAGCGACGAATGAGCTCCACAG  | 7680 |
|   |      |                                                              |      |
| 2 | 7621 | GTGCTCTGAAAGGGCCAGTCTGCAAGATGAGGGTTGGAAGCGACGAATGAGCTCCACAG  | 7680 |
|   |      |                                                              |      |
| 1 | 7681 | GTCACGGGCCATTAGCATTGTCAGGTGGTCGCGAAAGGTCCTAAACTGGCGACCTATGGC | 7740 |
|   |      |                                                              |      |
| 2 | 7681 | GTCACGGGCCATTAGCATTGTCAGGTGGTCGCGAAAGGTCCTAAACTGGCGACCTATGGC | 7740 |

|   |      |                                                               |      |
|---|------|---------------------------------------------------------------|------|
| 1 | 7741 | CATTTTTTCTGGGGTGATGCAGTAGAAGGTAAGCGGGTCTTGTTCCAGCGGTCCCATCC   | 7800 |
|   |      |                                                               |      |
| 2 | 7741 | CATTTTTTCTGGGGTGATGCAGTAGAAGGTAAGCGGGTCTTGTTCCAGCGGTCCCATCC   | 7800 |
|   |      |                                                               |      |
| 1 | 7801 | AAGGTTTCGCGGCTAGGTCTCGCGCGGCAGTCACTAGAGGCTCATCTCCGCCGAACTTCAT | 7860 |
|   |      |                                                               |      |
| 2 | 7801 | AAGGTTTCGCGGCTAGGTCTCGCGCGGCAGTCACTAGAGGCTCATCTCCGCCGAACTTCAT | 7860 |
|   |      |                                                               |      |
| 1 | 7861 | GACCAGCATGAAGGGCACGAGCTGCTTCCCAAAGGCCCCATCCAAGTATAGGTCTCTAC   | 7920 |
|   |      |                                                               |      |
| 2 | 7861 | GACCAGCATGAAGGGCACGAGCTGCTTCCCAAAGGCCCCATCCAAGTATAGGTCTCTAC   | 7920 |
|   |      |                                                               |      |
| 1 | 7921 | ATCGTAGGTGACAAAGAGACGCTCGGTGCGAGGATGCGAGCCGATCGGGAAGAAGTGGAT  | 7980 |
|   |      |                                                               |      |
| 2 | 7921 | ATCGTAGGTGACAAAGAGACGCTCGGTGCGAGGATGCGAGCCGATCGGGAAGAAGTGGAT  | 7980 |
|   |      |                                                               |      |
| 1 | 7981 | CTCCCGCCACCAATTGGAGGAGTGGCTATTGATGTGGTGAAAGTAGAAGTCCCTGCGACG  | 8040 |
|   |      |                                                               |      |
| 2 | 7981 | CTCCCGCCACCAATTGGAGGAGTGGCTATTGATGTGGTGAAAGTAGAAGTCCCTGCGACG  | 8040 |
|   |      |                                                               |      |
| 1 | 8041 | GGCCGAACACTCGTGCTGGCTTTTGTAAAAACGTGCGCAGTACTGGCAGCGGTGCACGGG  | 8100 |
|   |      |                                                               |      |
| 2 | 8041 | GGCCGAACACTCGTGCTGGCTTTTGTAAAAACGTGCGCAGTACTGGCAGCGGTGCACGGG  | 8100 |
|   |      |                                                               |      |
| 1 | 8101 | CTGTACATCCTGCACGAGGTTGACCTGACGACCGCGCACAAAGGAAGCAGAGTGGGAATTT | 8160 |
|   |      |                                                               |      |
| 2 | 8101 | CTGTACATCCTGCACGAGGTTGACCTGACGACCGCGCACAAAGGAAGCAGAGTGGGAATTT | 8160 |
|   |      |                                                               |      |
| 1 | 8161 | GAGCCCCTCGCCTGGCGGGTTTGGCTGGTGGTCTTCTACTTTCGGCTGCTTGTCCTTGACC | 8220 |
|   |      |                                                               |      |
| 2 | 8161 | GAGCCCCTCGCCTGGCGGGTTTGGCTGGTGGTCTTCTACTTTCGGCTGCTTGTCCTTGACC | 8220 |
|   |      |                                                               |      |
| 1 | 8221 | GTCTGGCTGCTCGAGGGGAGTTACGGTGGATCGGACCACCACGCCGCGCGAGCCCAAAGT  | 8280 |
|   |      |                                                               |      |
| 2 | 8221 | GTCTGGCTGCTCGAGGGGAGTTACGGTGGATCGGACCACCACGCCGCGCGAGCCCAAAGT  | 8280 |
|   |      |                                                               |      |
| 1 | 8281 | CCAGATGTCCGCGCGCGGGTGGAGCTTGATGACAACATCGCGCAGATGGGAGCTGTC     | 8340 |
|   |      |                                                               |      |
| 2 | 8281 | CCAGATGTCCGCGCGCGGGTGGAGCTTGATGACAACATCGCGCAGATGGGAGCTGTC     | 8340 |

1 8341 CATGGTCTGGAGCTCCCGCGGCGTCAGGTCAGGCGGGAGCTCCTGCAGGTTTACCTCGCA 8400  
|||||

2 8341 CATGGTCTGGAGCTCCCGCGGCGTCAGGTCAGGCGGGAGCTCCTGCAGGTTTACCTCGCA 8400

  

1 8401 TAGACGGGTTCAGGGCGCGGGCTAGATCCAGGTGATACCTAATTTCCAGGGGCTGGTTGGT 8460  
|||||

2 8401 TAGACGGGTTCAGGGCGCGGGCTAGATCCAGGTGATACCTAATTTCCAGGGGCTGGTTGGT 8460

  

1 8461 GGC GGCGTCGATGGCTTGCAAGAGGCCGCATCCCCGCGGCGCGACTACGGTACCGCGCGG 8520  
|||||

2 8461 GGC GGCGTCGATGGCTTGCAAGAGGCCGCATCCCCGCGGCGCGACTACGGTACCGCGCGG 8520

  

1 8521 CGGGCGGTTGGGCCGCGGGGGTGTCTTGGATGATGCATCTAAAAGCGGTGACGCGGGCGA 8580  
|||||

2 8521 CGGGCGGTTGGGCCGCGGGGGTGTCTTGGATGATGCATCTAAAAGCGGTGACGCGGGCGA 8580

  

1 8581 GCCCCGGAGGTAGGGGGGGCTCCGGACCCGCCGGGAGAGGGGGCAGGGGCACGTCGGCG 8640  
|||||

2 8581 GCCCCGGAGGTAGGGGGGGCTCCGGACCCGCCGGGAGAGGGGGCAGGGGCACGTCGGCG 8640

  

1 8641 CCGCGCGCGGGCAGGAGCTGGTGCTGCGCGCGTAGGTTGCTGGCGAACGCGACGACGCGG 8700  
|||||

2 8641 CCGCGCGCGGGCAGGAGCTGGTGCTGCGCGCGTAGGTTGCTGGCGAACGCGACGACGCGG 8700

  

1 8701 CGGTTGATCTCCTGAATCTGGCGCCTCTGCGTGAAGACGACGGGCCCGGTGAGCTTGAAC 8760  
|||||

2 8701 CGGTTGATCTCCTGAATCTGGCGCCTCTGCGTGAAGACGACGGGCCCGGTGAGCTTGAAC 8760

  

1 8761 CTGAAAGAGAGTTCGACAGAATCAATTTCCGGTGTGCTTGACGGCGGCCTGGCGCAAATC 8820  
|||||

2 8761 CTGAAAGAGAGTTCGACAGAATCAATTTCCGGTGTGCTTGACGGCGGCCTGGCGCAAATC 8820

  

1 8821 TCCTGCACGTCTCCTGAGTTGTCTTGATAGGCGATCTCGGCCATGAACTGCTCGATCTCT 8880  
|||||

2 8821 TCCTGCACGTCTCCTGAGTTGTCTTGATAGGCGATCTCGGCCATGAACTGCTCGATCTCT 8880

  

1 8881 TCCTCCTGGAGATCTCCGCGTCCGGCTCGCTCCACGGTGGCGGCGAGGTCGTTGGAAATG 8940  
|||||

2 8881 TCCTCCTGGAGATCTCCGCGTCCGGCTCGCTCCACGGTGGCGGCGAGGTCGTTGGAAATG 8940

|   |      |                                                               |      |
|---|------|---------------------------------------------------------------|------|
| 1 | 8941 | CGGGCCATGAGCTGCGAGAAGGCGTTGAGGCCTCCCTCGTTCCAGACGCGGCTGTAGACC  | 9000 |
|   |      |                                                               |      |
| 2 | 8941 | CGGGCCATGAGCTGCGAGAAGGCGTTGAGGCCTCCCTCGTTCCAGACGCGGCTGTAGACC  | 9000 |
| 1 | 9001 | ACGCCCCCTTCGGCATCGCGGGCGCGCATGACCACCTGCGCGAGATTGAGCTCCACGTGC  | 9060 |
|   |      |                                                               |      |
| 2 | 9001 | ACGCCCCCTTCGGCATCGCGGGCGCGCATGACCACCTGCGCGAGATTGAGCTCCACGTGC  | 9060 |
| 1 | 9061 | CGGGCGAAGACGGCGTAGTTTCGCAGGCGCTGAAAGAGGTAGTTGAGGGTGGTGGCGGTG  | 9120 |
|   |      |                                                               |      |
| 2 | 9061 | CGGGCGAAGACGGCGTAGTTTCGCAGGCGCTGAAAGAGGTAGTTGAGGGTGGTGGCGGTG  | 9120 |
| 1 | 9121 | TGTTCTGCCACGAAGAAGTACATAAACCAGCGTCGCAACGTGGATTGTTGATATCCCCC   | 9180 |
|   |      |                                                               |      |
| 2 | 9121 | TGTTCTGCCACGAAGAAGTACATAAACCAGCGTCGCAACGTGGATTGTTGATATCCCCC   | 9180 |
| 1 | 9181 | AAGGCCTCAAGGCGCTCCATGGCCTCGTAGAAGTCCACGGCGAAGTTGAAAACTGGGAG   | 9240 |
|   |      |                                                               |      |
| 2 | 9181 | AAGGCCTCAAGGCGCTCCATGGCCTCGTAGAAGTCCACGGCGAAGTTGAAAACTGGGAG   | 9240 |
| 1 | 9241 | TTGCGCGCCGACACGGTTAACTCCTCCTCCAGAAGACGGATGAGCTCGGCGACAGTGTCG  | 9300 |
|   |      |                                                               |      |
| 2 | 9241 | TTGCGCGCCGACACGGTTAACTCCTCCTCCAGAAGACGGATGAGCTCGGCGACAGTGTCG  | 9300 |
| 1 | 9301 | CGCACCTCGCGCTCAAAGGCTACAGGGGCCTCTTCTTCTTCTTCAATCTCCTCTTCCATA  | 9360 |
|   |      |                                                               |      |
| 2 | 9301 | CGCACCTCGCGCTCAAAGGCTACAGGGGCCTCTTCTTCTTCTTCAATCTCCTCTTCCATA  | 9360 |
| 1 | 9361 | AGGGCCTCCCCTTCTTCTTCTTCTGCGCGCGGTGGGGGAGGGGGACACGGCGGCGACGA   | 9420 |
|   |      |                                                               |      |
| 2 | 9361 | AGGGCCTCCCCTTCTTCTTCTTCTGCGCGCGGTGGGGGAGGGGGACACGGCGGCGACGA   | 9420 |
| 1 | 9421 | CGGCGCACCGGGAGGCGGTTCGACAAAGCGCTCGATCATCTCCCCGCGGCGACGGCGCATG | 9480 |
|   |      |                                                               |      |
| 2 | 9421 | CGGCGCACCGGGAGGCGGTTCGACAAAGCGCTCGATCATCTCCCCGCGGCGACGGCGCATG | 9480 |
| 1 | 9481 | GTCTCGGTGACGGCGCGGCCGTTCTCGCGGGGGCGCAGTTGGAAGACGCCGCCGTCATG   | 9540 |
|   |      |                                                               |      |
| 2 | 9481 | GTCTCGGTGACGGCGCGGCCGTTCTCGCGGGGGCGCAGTTGGAAGACGCCGCCGTCATG   | 9540 |



|   |        |                                                               |        |
|---|--------|---------------------------------------------------------------|--------|
| 1 | 9541   | TCCCGGTTATGGGTTGGCGGGGGGCTGCCATGCGGCAGGGATACGGCGCTAACGATGCAT  | 9600   |
|   |        |                                                               |        |
| 2 | 9541   | TCCCGGTTATGGGTTGGCGGGGGGCTGCCATGCGGCAGGGATACGGCGCTAACGATGCAT  | 9600   |
| 1 | 9601   | CTCAACAATTGTTGTGTAGGTACTCCGCCGCCGAGGGACCTGAGCGAGTCCGCATCGACC  | 9660   |
|   |        |                                                               |        |
| 2 | 9601   | CTCAACAATTGTTGTGTAGGTACTCCGCCGCCGAGGGACCTGAGCGAGTCCGCATCGACC  | 9660   |
| 1 | 9661   | GGATCGGAAAACCTCTCGAGAAAGGCGTCTAACCCAGTCACAGTCGCAAGGTAGGCTGAGC | 9720   |
|   |        |                                                               |        |
| 2 | 9661   | GGATCGGAAAACCTCTCGAGAAAGGCGTCTAACCCAGTCACAGTCGCAAGGTAGGCTGAGC | 9720   |
| 1 | 9721   | ACCGTGCGGGCGGCAGCGGGCGGCGGTCGGGGTTGTTTCTGGCGGAGGTGCTGCTGATG   | 9780   |
|   |        |                                                               |        |
| 2 | 9721   | ACCGTGCGGGCGGCAGCGGGCGGCGGTCGGGGTTGTTTCTGGCGGAGGTGCTGCTGATG   | 9780   |
| 1 | 9781   | ATGTAATTAAGTAGGCGGTCTTGAGACGGCGGATGGTCGACAGAAGCACCATGTCCTTG   | 9840   |
|   |        |                                                               |        |
| 2 | 9781   | ATGTAATTAAGTAGGCGGTCTTGAGACGGCGGATGGTCGACAGAAGCACCATGTCCTTG   | 9840   |
| 1 | 9841   | GGTCCGGCCTGCTGAATGCGCAGGCGGTGCGCCATGCCCCAGGCTTCGTTTTGACATCGG  | 9900   |
|   |        |                                                               |        |
| 2 | 9841   | GGTCCGGCCTGCTGAATGCGCAGGCGGTGCGCCATGCCCCAGGCTTCGTTTTGACATCGG  | 9900   |
| 1 | 9901   | CGCAGGTCTTTGTAGTAGTCTTGTCATGAGCCTTTCTACCGGCACTTCTTCTTCTCCTTCC | 9960   |
|   |        |                                                               |        |
| 2 | 9901   | CGCAGGTCTTTGTAGTAGTCTTGTCATGAGCCTTTCTACCGGCACTTCTTCTTCTCCTTCC | 9960   |
| 1 | 9961   | TCTTGTCCTGCATCTCTTGTCATCTATCGCTGCGGCGGCGGCGGAGTTTGCCGTAGGTGG  | 10 020 |
|   |        |                                                               |        |
| 2 | 9961   | TCTTGTCCTGCATCTCTTGTCATCTATCGCTGCGGCGGCGGCGGAGTTTGCCGTAGGTGG  | 10 020 |
| 1 | 10 021 | CGCCCTCTTCCCTCCCATGCGTGTGACCCCGAAGCCCCTCATCGGCTGAAGCAGGGCTAGG | 10 080 |
|   |        |                                                               |        |
| 2 | 10 021 | CGCCCTCTTCCCTCCCATGCGTGTGACCCCGAAGCCCCTCATCGGCTGAAGCAGGGCTAGG | 10 080 |
| 1 | 10 081 | TCGGCGACAACGCGCTCGGCTAATATGGCCTGCTGCACCTGCGTGAGGGTAGACTGGAAG  | 10 140 |
|   |        |                                                               |        |
| 2 | 10 081 | TCGGCGACAACGCGCTCGGCTAATATGGCCTGCTGCACCTGCGTGAGGGTAGACTGGAAG  | 10 140 |

|   |        |                                                                   |        |
|---|--------|-------------------------------------------------------------------|--------|
| 1 | 10 141 | TCATCCATGTCCACAAAGCGGTGGTATGCGCCCGTGGTGGTAAAGTGCAGTTGGCC<br>      | 10 200 |
| 2 | 10 141 | TCATCCATGTCCACAAAGCGGTGGTATGCGCCCGTGGTGGTAAAGTGCAGTTGGCC<br>      | 10 200 |
| 1 | 10 201 | ATAACGGACCAGTTAACGGTCTGGTGACCCGGCTGCGAGAGCTCGGTGTACCTGAGACGC<br>  | 10 260 |
| 2 | 10 201 | ATAACGGACCAGTTAACGGTCTGGTGACCCGGCTGCGAGAGCTCGGTGTACCTGAGACGC<br>  | 10 260 |
| 1 | 10 261 | GAGTAAGCCCTCGAGTCAAATACGTAGTCGTTGCAAGTCCGCACCAGGTACTGGTATCCC<br>  | 10 320 |
| 2 | 10 261 | GAGTAAGCCCTCGAGTCAAATACGTAGTCGTTGCAAGTCCGCACCAGGTACTGGTATCCC<br>  | 10 320 |
| 1 | 10 321 | ACCAAAAAGTGCGGCGGCGGCTGGCGGTAGAGGGGCCAGCGTAGGGTGGCCGGGGCTCCG<br>  | 10 380 |
| 2 | 10 321 | ACCAAAAAGTGCGGCGGCGGCTGGCGGTAGAGGGGCCAGCGTAGGGTGGCCGGGGCTCCG<br>  | 10 380 |
| 1 | 10 381 | GGGGCGAGATCTTCCAACATAAGGCGATGATATCCGTAGATGTACCTGGACATCCAGGTG<br>  | 10 440 |
| 2 | 10 381 | GGGGCGAGATCTTCCAACATAAGGCGATGATATCCGTAGATGTACCTGGACATCCAGGTG<br>  | 10 440 |
| 1 | 10 441 | ATGCCGGCGGCGGTGGTGGAGGCGCGCGGAAAGTCGCGGACGCGGTTCCAGATGTTGCGC<br>  | 10 500 |
| 2 | 10 441 | ATGCCGGCGGCGGTGGTGGAGGCGCGCGGAAAGTCGCGGACGCGGTTCCAGATGTTGCGC<br>  | 10 500 |
| 1 | 10 501 | AGCGGCCAAAAGTGCTCCATGGTCGGGACGCTCTGGCCGGTCAGGCGCGCGCAATCGTTG<br>  | 10 560 |
| 2 | 10 501 | AGCGGCCAAAAGTGCTCCATGGTCGGGACGCTCTGGCCGGTCAGGCGCGCGCAATCGTTG<br>  | 10 560 |
| 1 | 10 561 | ACGCTCTAGACCGTGCAAAAGGAGAGCCTGTAAGCGGGCACTCTTCCGTGGTCTGGTGGG<br>  | 10 620 |
| 2 | 10 561 | ACGCTCTAGACCGTGCAAAAGGAGAGCCTGTAAGCGGGCACTCTTCCGTGGTCTGGTGGG<br>  | 10 620 |
| 1 | 10 621 | TAAATTCGCAAGGGTATCATGGCGGACGACCGGGGTTTCGAGCCCCGTATCCGGCCGTCCG<br> | 10 680 |
| 2 | 10 621 | TAAATTCGCAAGGGTATCATGGCGGACGACCGGGGTTTCGAGCCCCGTATCCGGCCGTCCG<br> | 10 680 |
| 1 | 10 681 | CCGTGATCCATGCGGTTACCGCCCGCGTGTCTGAACCCAGGTGTGCGACGTCAGACAACGG<br> | 10 740 |
| 2 | 10 681 | CCGTGATCCATGCGGTTACCGCCCGCGTGTCTGAACCCAGGTGTGCGACGTCAGACAACGG<br> | 10 740 |

|   |        |                                                                  |        |
|---|--------|------------------------------------------------------------------|--------|
| 1 | 10 741 | GGGAGTGCTCCTTTTTGGCTTCCCTTCCAGGCGCGGGCGGCTGCTGCGCTAGCTTTTTTTGGCC | 10 800 |
|   |        |                                                                  |        |
| 2 | 10 741 | GGGAGTGCTCCTTTTTGGCTTCCCTTCCAGGCGCGGGCGGCTGCTGCGCTAGCTTTTTTTGGCC | 10 800 |
| 1 | 10 801 | ACTGGCCGCGCGCAGCGTAAGCGGTTAGGCTGGAAAGCGAAAGCATTAAAGTGGCTCGCTC    | 10 860 |
|   |        |                                                                  |        |
| 2 | 10 801 | ACTGGCCGCGCGCAGCGTAAGCGGTTAGGCTGGAAAGCGAAAGCATTAAAGTGGCTCGCTC    | 10 860 |
| 1 | 10 861 | CCTGTAGCCGGAGGGTTATTTTCCAAGGTTGAGTCGCGGGACCCCCGGTTCGAGTCTCG      | 10 920 |
|   |        |                                                                  |        |
| 2 | 10 861 | CCTGTAGCCGGAGGGTTATTTTCCAAGGTTGAGTCGCGGGACCCCCGGTTCGAGTCTCG      | 10 920 |
| 1 | 10 921 | GACCGGCCGGACTGCGGCGAACGGGGGTTTGCCTCCCCGTCATGCAAGACCCCGCTTGCA     | 10 980 |
|   |        |                                                                  |        |
| 2 | 10 921 | GACCGGCCGGACTGCGGCGAACGGGGGTTTGCCTCCCCGTCATGCAAGACCCCGCTTGCA     | 10 980 |
| 1 | 10 981 | AATTCCTCCGAAACAGGGACGAGCCCCCTTTTTTGCTTTTCCCAGATGCATCCGGTGCTG     | 11 040 |
|   |        |                                                                  |        |
| 2 | 10 981 | AATTCCTCCGAAACAGGGACGAGCCCCCTTTTTTGCTTTTCCCAGATGCATCCGGTGCTG     | 11 040 |
| 1 | 11 041 | CGGCAGATGCGCCCCCTCCTCAGCAGCGGCAAGAGCAAGAGCAGCGGCAGACATGCAGG      | 11 100 |
|   |        |                                                                  |        |
| 2 | 11 041 | CGGCAGATGCGCCCCCTCCTCAGCAGCGGCAAGAGCAAGAGCAGCGGCAGACATGCAGG      | 11 100 |
| 1 | 11 101 | GCACCCCTCCCCTCCTCCTACCGCGTCAGGAGGGGCGACATCCGCGGTTGACGCGGCAGCA    | 11 160 |
|   |        |                                                                  |        |
| 2 | 11 101 | GCACCCCTCCCCTCCTCCTACCGCGTCAGGAGGGGCGACATCCGCGGTTGACGCGGCAGCA    | 11 160 |
| 1 | 11 161 | GATGGTGATTACGAACCCCGCGGCGCCGGGCCCGGCACTACCTGGACTTGGAGGAGGGC      | 11 220 |
|   |        |                                                                  |        |
| 2 | 11 161 | GATGGTGATTACGAACCCCGCGGCGCCGGGCCCGGCACTACCTGGACTTGGAGGAGGGC      | 11 220 |
| 1 | 11 221 | GAGGGCCTGGCGCGGCTAGGAGCGCCCTCCTGAGCGGCACCCAAGGGTGCAGCTGAAG       | 11 280 |
|   |        |                                                                  |        |
| 2 | 11 221 | GAGGGCCTGGCGCGGCTAGGAGCGCCCTCCTGAGCGGCACCCAAGGGTGCAGCTGAAG       | 11 280 |
| 1 | 11 281 | CGTGATACGCGTGAGGCGTACGTGCCGCGGCAGAACCTGTTTCGCGACCGCGAGGGAGAG     | 11 340 |
|   |        |                                                                  |        |
| 2 | 11 281 | CGTGATACGCGTGAGGCGTACGTGCCGCGGCAGAACCTGTTTCGCGACCGCGAGGGAGAG     | 11 340 |

|   |        |                                                                   |        |
|---|--------|-------------------------------------------------------------------|--------|
| 1 | 11 341 | GAGCCCGAGGAGATGCGGGATCGAAAGTTCCACGCAGGGCGCGAGCTGCGGCATGGCCTG<br>  | 11 400 |
| 2 | 11 341 | GAGCCCGAGGAGATGCGGGATCGAAAGTTCCACGCAGGGCGCGAGCTGCGGCATGGCCTG<br>  | 11 400 |
|   |        |                                                                   |        |
| 1 | 11 401 | AATCGCGAGCGGTTGCTGCGCGAGGAGGACTTTGAGCCCGACGCGGAACCGGGATTAGT<br>   | 11 460 |
| 2 | 11 401 | AATCGCGAGCGGTTGCTGCGCGAGGAGGACTTTGAGCCCGACGCGGAACCGGGATTAGT<br>   | 11 460 |
|   |        |                                                                   |        |
| 1 | 11 461 | CCCGCGCGCGCACACGTGGCGGCCGCGACCTGGTAACCGCATACGAGCAGACGGTGAAC<br>   | 11 520 |
| 2 | 11 461 | CCCGCGCGCGCACACGTGGCGGCCGCGACCTGGTAACCGCATACGAGCAGACGGTGAAC<br>   | 11 520 |
|   |        |                                                                   |        |
| 1 | 11 521 | CAGGAGATTAACTTTCAAAAAGCTTTAACAACCACGTGCGTACGCTTGTGGCGCGCGAG<br>   | 11 580 |
| 2 | 11 521 | CAGGAGATTAACTTTCAAAAAGCTTTAACAACCACGTGCGTACGCTTGTGGCGCGCGAG<br>   | 11 580 |
|   |        |                                                                   |        |
| 1 | 11 581 | GAGGTGGCTATAGGACTGATGCATCTGTGGGACTTTGTAAGCGCGCTGGAGCAAACCCA<br>   | 11 640 |
| 2 | 11 581 | GAGGTGGCTATAGGACTGATGCATCTGTGGGACTTTGTAAGCGCGCTGGAGCAAACCCA<br>   | 11 640 |
|   |        |                                                                   |        |
| 1 | 11 641 | AATAGCAAGCCGCTCATGGCGCAGCTGTTTCCTTATAGTGCAGCACAGCAGGGACAACGAG<br> | 11 700 |
| 2 | 11 641 | AATAGCAAGCCGCTCATGGCGCAGCTGTTTCCTTATAGTGCAGCACAGCAGGGACAACGAG<br> | 11 700 |
|   |        |                                                                   |        |
| 1 | 11 701 | GCATTCAGGGATGCGCTGCTAAACATAGTAGAGCCCGAGGGCCGCTGGCTGCTCGATTTG<br>  | 11 760 |
| 2 | 11 701 | GCATTCAGGGATGCGCTGCTAAACATAGTAGAGCCCGAGGGCCGCTGGCTGCTCGATTTG<br>  | 11 760 |
|   |        |                                                                   |        |
| 1 | 11 761 | ATAAACATCCTGCAGAGCATAGTGGTGCAGGAGCGCAGCTTGAGCCTGGCTGACAAGGTG<br>  | 11 820 |
| 2 | 11 761 | ATAAACATCCTGCAGAGCATAGTGGTGCAGGAGCGCAGCTTGAGCCTGGCTGACAAGGTG<br>  | 11 820 |
|   |        |                                                                   |        |
| 1 | 11 821 | GCCGCCATCAACTATTCCATGCTTAGCCTGGGCAAGTTTTACGCCCGCAAGATATACCAT<br>  | 11 880 |
| 2 | 11 821 | GCCGCCATCAACTATTCCATGCTTAGCCTGGGCAAGTTTTACGCCCGCAAGATATACCAT<br>  | 11 880 |
|   |        |                                                                   |        |
| 1 | 11 881 | ACCCCTTACGTTCCCATAGACAAGGAGGTAAAGATCGAGGGGTTCTACATGCGCATGGCG<br>  | 11 940 |
| 2 | 11 881 | ACCCCTTACGTTCCCATAGACAAGGAGGTAAAGATCGAGGGGTTCTACATGCGCATGGCG<br>  | 11 940 |

|   |        |                                                               |        |
|---|--------|---------------------------------------------------------------|--------|
| 1 | 11 941 | CTGAAGGTGCTTACCTTGAGCGACGACCTGGGCGTTTATCGCAACGAGCGCATCCACAAG  | 12 000 |
|   |        |                                                               |        |
| 2 | 11 941 | CTGAAGGTGCTTACCTTGAGCGACGACCTGGGCGTTTATCGCAACGAGCGCATCCACAAG  | 12 000 |
|   |        |                                                               |        |
| 1 | 12 001 | GCCGTGAGCGTGAGCCGGCGGCGGAGCTCAGCGACCGCGAGCTGATGCACAGCCTGCAA   | 12 060 |
|   |        |                                                               |        |
| 2 | 12 001 | GCCGTGAGCGTGAGCCGGCGGCGGAGCTCAGCGACCGCGAGCTGATGCACAGCCTGCAA   | 12 060 |
|   |        |                                                               |        |
| 1 | 12 061 | AGGGCCCTGGCTGGCACGGGCAGCGGCGATAGAGAGGCGAGTCCTACTTTGACGCGGGC   | 12 120 |
|   |        |                                                               |        |
| 2 | 12 061 | AGGGCCCTGGCTGGCACGGGCAGCGGCGATAGAGAGGCGAGTCCTACTTTGACGCGGGC   | 12 120 |
|   |        |                                                               |        |
| 1 | 12 121 | GCTGACCTGCGCTGGGCCCAAGCCGACGCGCCCTGGAGGCAGCTGGGGCCGGACCTGGG   | 12 180 |
|   |        |                                                               |        |
| 2 | 12 121 | GCTGACCTGCGCTGGGCCCAAGCCGACGCGCCCTGGAGGCAGCTGGGGCCGGACCTGGG   | 12 180 |
|   |        |                                                               |        |
| 1 | 12 181 | CTGGCGGTGGCACCCGCGCGCGCTGGCAACGTCGGCGGCGTGGAGGAATATGACGAGGAC  | 12 240 |
|   |        |                                                               |        |
| 2 | 12 181 | CTGGCGGTGGCACCCGCGCGCGCTGGCAACGTCGGCGGCGTGGAGGAATATGACGAGGAC  | 12 240 |
|   |        |                                                               |        |
| 1 | 12 241 | GATGAGTACGAGCCAGAGGACGGCGAGTACTAAGCGGTGATGTTTCTGATCAGATGATGC  | 12 300 |
|   |        |                                                               |        |
| 2 | 12 241 | GATGAGTACGAGCCAGAGGACGGCGAGTACTAAGCGGTGATGTTTCTGATCAGATGATGC  | 12 300 |
|   |        |                                                               |        |
| 1 | 12 301 | AAGACGCAACGGACCCGGCGGTGCGGGCGGCGCTGCAGAGCCAGCCGTCCGGCCTTAACT  | 12 360 |
|   |        |                                                               |        |
| 2 | 12 301 | AAGACGCAACGGACCCGGCGGTGCGGGCGGCGCTGCAGAGCCAGCCGTCCGGCCTTAACT  | 12 360 |
|   |        |                                                               |        |
| 1 | 12 361 | CCACGGACGACTGGCGCCAGGTCATGGACCGCATCATGTGCTGACTGCGCGCAATCCTG   | 12 420 |
|   |        |                                                               |        |
| 2 | 12 361 | CCACGGACGACTGGCGCCAGGTCATGGACCGCATCATGTGCTGACTGCGCGCAATCCTG   | 12 420 |
|   |        |                                                               |        |
| 1 | 12 421 | ACGCGTTCCGGCAGCAGCCGCAGGCCAACC GGCTCTCCGCAATTCTGGAAGCGGTGGTCC | 12 480 |
|   |        |                                                               |        |
| 2 | 12 421 | ACGCGTTCCGGCAGCAGCCGCAGGCCAACC GGCTCTCCGCAATTCTGGAAGCGGTGGTCC | 12 480 |
|   |        |                                                               |        |
| 1 | 12 481 | CGGCGCGCGCAAACCCACGCACGAGAAGGTGCTGGCGATCGTAAACGCGCTGGCCGAAA   | 12 540 |
|   |        |                                                               |        |
| 2 | 12 481 | CGGCGCGCGCAAACCCACGCACGAGAAGGTGCTGGCGATCGTAAACGCGCTGGCCGAAA   | 12 540 |

|   |        |                                                               |        |
|---|--------|---------------------------------------------------------------|--------|
| 1 | 12 541 | ACAGGGCCATCCGGCCCGACGAGGCCGGCCTGGTCTACGACGCGCTGCTTCAGCGCGTGG  | 12 600 |
|   |        |                                                               |        |
| 2 | 12 541 | ACAGGGCCATCCGGCCCGACGAGGCCGGCCTGGTCTACGACGCGCTGCTTCAGCGCGTGG  | 12 600 |
| 1 | 12 601 | CTCGTTACAACAGCGGCAACGTGCAGACCAACCTGGACCGGCTGGTGGGGGATGTGCGCG  | 12 660 |
|   |        |                                                               |        |
| 2 | 12 601 | CTCGTTACAACAGCGGCAACGTGCAGACCAACCTGGACCGGCTGGTGGGGGATGTGCGCG  | 12 660 |
| 1 | 12 661 | AGGCCGTGGCGCAGCGTGAGCGCGCGCAGCAGCAGGGCAACCTGGGCTCCATGGTTGCAC  | 12 720 |
|   |        |                                                               |        |
| 2 | 12 661 | AGGCCGTGGCGCAGCGTGAGCGCGCGCAGCAGCAGGGCAACCTGGGCTCCATGGTTGCAC  | 12 720 |
| 1 | 12 721 | TAAACGCCTTCCTGAGTACACAGCCCGCCAACGTGCCGCGGGGACAGGAGGACTACACCA  | 12 780 |
|   |        |                                                               |        |
| 2 | 12 721 | TAAACGCCTTCCTGAGTACACAGCCCGCCAACGTGCCGCGGGGACAGGAGGACTACACCA  | 12 780 |
| 1 | 12 781 | ACTTTGTGAGCGCACTGCGGCTAATGGTGACTGAGACACCGCAAAGTGAGGTGTACCAGT  | 12 840 |
|   |        |                                                               |        |
| 2 | 12 781 | ACTTTGTGAGCGCACTGCGGCTAATGGTGACTGAGACACCGCAAAGTGAGGTGTACCAGT  | 12 840 |
| 1 | 12 841 | CTGGGCCAGACTATTTTTTCCAGACCAGTAGACAAGGCCTGCAGACCGTAAACCTGAGCC  | 12 900 |
|   |        |                                                               |        |
| 2 | 12 841 | CTGGGCCAGACTATTTTTTCCAGACCAGTAGACAAGGCCTGCAGACCGTAAACCTGAGCC  | 12 900 |
| 1 | 12 901 | AGGCTTTCAAAAACCTTGCAGGGGCTGTGGGGGGTGCGGGCTCCCACAGGCGACCGCGCGA | 12 960 |
|   |        |                                                               |        |
| 2 | 12 901 | AGGCTTTCAAAAACCTTGCAGGGGCTGTGGGGGGTGCGGGCTCCCACAGGCGACCGCGCGA | 12 960 |
| 1 | 12 961 | CCGTGTCTAGCTTGCTGACGCCAACTCGCGCCTGTTGCTGCTGCTAATAGCGCCCTTCA   | 13 020 |
|   |        |                                                               |        |
| 2 | 12 961 | CCGTGTCTAGCTTGCTGACGCCAACTCGCGCCTGTTGCTGCTGCTAATAGCGCCCTTCA   | 13 020 |
| 1 | 13 021 | CGGACAGTGGCAGCGTGTCCCGGGACACATACCTAGGTCACCTTGCTGACACTGTACCGCG | 13 080 |
|   |        |                                                               |        |
| 2 | 13 021 | CGGACAGTGGCAGCGTGTCCCGGGACACATACCTAGGTCACCTTGCTGACACTGTACCGCG | 13 080 |
| 1 | 13 081 | AGGCCATAGGTCAGGCGCATGTGGACGAGCATACTTTCCAGGAGATTACAAGTGTGACGCC | 13 140 |
|   |        |                                                               |        |
| 2 | 13 081 | AGGCCATAGGTCAGGCGCATGTGGACGAGCATACTTTCCAGGAGATTACAAGTGTGACGCC | 13 140 |

```

1 13 141 GCGCGCTGGGGCAGGAGGACACGGGCAGCCTGGAGGCAACCCTAAACTACCTGCTGACCA 13 200
  |||
2 13 141 GCGCGCTGGGGCAGGAGGACACGGGCAGCCTGGAGGCAACCCTAAACTACCTGCTGACCA 13 200

1 13 201 ACCGGCGGCAGAAAGATCCCCTCGTTGCACAGTTTAAACAGCGAGGAGGAGCGCATTTTGC 13 260
  |||
2 13 201 ACCGGCGGCAGAAAGATCCCCTCGTTGCACAGTTTAAACAGCGAGGAGGAGCGCATTTTGC 13 260

1 13 261 GCTACGTGCAGCAGAGCGTGAGCCTTAACCTGATGCGCGACGGGGTAACGCCAGCGTG 13 320
  |||
2 13 261 GCTACGTGCAGCAGAGCGTGAGCCTTAACCTGATGCGCGACGGGGTAACGCCAGCGTG 13 320

1 13 321 CGCTGGACATGACCGCGCGCAACATGGAACCGGGCATGTATGCCTCAAACCGGCCGTTTA 13 380
  |||
2 13 321 CGCTGGACATGACCGCGCGCAACATGGAACCGGGCATGTATGCCTCAAACCGGCCGTTTA 13 380

1 13 381 TCAACCGCCTAATGGACTACTTGCATCGCGCGGCCGCCGTGAACCCGAGTATTTACCA 13 440
  |||
2 13 381 TCAACCGCCTAATGGACTACTTGCATCGCGCGGCCGCCGTGAACCCGAGTATTTACCA 13 440

1 13 441 ATGCCATCTTGAACCCGCACTGGCTACCGCCCCCTGGTTTCTACACGGGGGATTTCGAGG 13 500
  |||
2 13 441 ATGCCATCTTGAACCCGCACTGGCTACCGCCCCCTGGTTTCTACACGGGGGATTTCGAGG 13 500

1 13 501 TGCCCGAGGGTAACGATGGATTCCTCTGGGACGACATAGACGACAGCGTGT TTTCCCCGC 13 560
  |||
2 13 501 TGCCCGAGGGTAACGATGGATTCCTCTGGGACGACATAGACGACAGCGTGT TTTCCCCGC 13 560

1 13 561 AACCGCAGACCCTGCTAGAGTTGCAACAGCGCGAGCAGGCAGAGGCGGCGCTGCGAAAGG 13 620
  |||
2 13 561 AACCGCAGACCCTGCTAGAGTTGCAACAGCGCGAGCAGGCAGAGGCGGCGCTGCGAAAGG 13 620

1 13 621 AAAGCTTCCGCAGGCCAAGCAGCTTGTC CGATCTAGGCGCTGCGGCCCGCGGTCAGATG 13 680
  |||
2 13 621 AAAGCTTCCGCAGGCCAAGCAGCTTGTC CGATCTAGGCGCTGCGGCCCGCGGTCAGATG 13 680

1 13 681 CTAGTAGCCCATTTCCAAGCTTGATAGGGTCTCTTACCAGCACTCGCACCACCGCCCGC 13 740
  |||
2 13 681 CTAGTAGCCCATTTCCAAGCTTGATAGGGTCTCTTACCAGCACTCGCACCACCGCCCGC 13 740

```

|   |        |                                                                  |        |
|---|--------|------------------------------------------------------------------|--------|
| 1 | 13 741 | GCCTGCTGGGCGAGGAGGAGTACCTAAACAACCTCGCTGCTGCAGCCGCAGCGCGAAAAAA    | 13 800 |
|   |        |                                                                  |        |
| 2 | 13 741 | GCCTGCTGGGCGAGGAGGAGTACCTAAACAACCTCGCTGCTGCAGCCGCAGCGCGAAAAAA    | 13 800 |
|   |        |                                                                  |        |
| 1 | 13 801 | ACCTGCCTCCGGCATTTCCTCAACAACGGGATAGAGAGCCTAGTGGACAAGATGAGTAGAT    | 13 860 |
|   |        |                                                                  |        |
| 2 | 13 801 | ACCTGCCTCCGGCATTTCCTCAACAACGGGATAGAGAGCCTAGTGGACAAGATGAGTAGAT    | 13 860 |
|   |        |                                                                  |        |
| 1 | 13 861 | GGAAGACGTACGCGCAGGAGCACAGGGACGTGCCAGGCCCGCGCCCGCCACCCGTCGTC      | 13 920 |
|   |        |                                                                  |        |
| 2 | 13 861 | GGAAGACGTACGCGCAGGAGCACAGGGACGTGCCAGGCCCGCGCCCGCCACCCGTCGTC      | 13 920 |
|   |        |                                                                  |        |
| 1 | 13 921 | AAAGGCACGACCGTCAGCGGGGTCTGGTGTGGGAGGACGATGACTCGGCAGACGACAGCA     | 13 980 |
|   |        |                                                                  |        |
| 2 | 13 921 | AAAGGCACGACCGTCAGCGGGGTCTGGTGTGGGAGGACGATGACTCGGCAGACGACAGCA     | 13 980 |
|   |        |                                                                  |        |
| 1 | 13 981 | GCGTCCTGGATTTGGGAGGGAGTGGCAACCCGTTTGCGCACCTTCGCCCCAGGCTGGGGA     | 14 040 |
|   |        |                                                                  |        |
| 2 | 13 981 | GCGTCCTGGATTTGGGAGGGAGTGGCAACCCGTTTGCGCACCTTCGCCCCAGGCTGGGGA     | 14 040 |
|   |        |                                                                  |        |
| 1 | 14 041 | GAATGTTTTAAAAAAAAAAAAAAAAAGCATGATGCAAAATAAAAAACTCACCAAGGCCATGGCA | 14 100 |
|   |        |                                                                  |        |
| 2 | 14 041 | GAATGTTTTAAAAAAAAAAAAAAAAAGCATGATGCAAAATAAAAAACTCACCAAGGCCATGGCA | 14 100 |
|   |        |                                                                  |        |
| 1 | 14 101 | CCGAGCGTTGGTTTTCTTGATTTCCCTTAGTATGCGGCGCGCGGCGATGTATGAGGAAG      | 14 160 |
|   |        |                                                                  |        |
| 2 | 14 101 | CCGAGCGTTGGTTTTCTTGATTTCCCTTAGTATGCGGCGCGCGGCGATGTATGAGGAAG      | 14 160 |
|   |        |                                                                  |        |
| 1 | 14 161 | GTCCTCCTCCCTCCTACGAGAGTGTGGTGAGCGCGGCGCCAGTGGCGGCGGCGCTGGGTT     | 14 220 |
|   |        |                                                                  |        |
| 2 | 14 161 | GTCCTCCTCCCTCCTACGAGAGTGTGGTGAGCGCGGCGCCAGTGGCGGCGGCGCTGGGTT     | 14 220 |
|   |        |                                                                  |        |
| 1 | 14 221 | CTCCCTTCGATGCTCCCCTGGACCCGCCGTTTGTGCCTCCGCGGTACCTGCGGCCTACCG     | 14 280 |
|   |        |                                                                  |        |
| 2 | 14 221 | CTCCCTTCGATGCTCCCCTGGACCCGCCGTTTGTGCCTCCGCGGTACCTGCGGCCTACCG     | 14 280 |
|   |        |                                                                  |        |
| 1 | 14 281 | GGGGGAGAAACAGCATCCGTTACTCTGAGTTGGCACCCCTATTCGACACCACCCGTGTGT     | 14 340 |
|   |        |                                                                  |        |
| 2 | 14 281 | GGGGGAGAAACAGCATCCGTTACTCTGAGTTGGCACCCCTATTCGACACCACCCGTGTGT     | 14 340 |



|   |        |                                                               |        |
|---|--------|---------------------------------------------------------------|--------|
| 1 | 14 341 | ACCTGGTGGACAACAAGTCAACGGATGTGGCATCCCTGAACTACCAGAACGACCACAGCA  | 14 400 |
|   |        |                                                               |        |
| 2 | 14 341 | ACCTGGTGGACAACAAGTCAACGGATGTGGCATCCCTGAACTACCAGAACGACCACAGCA  | 14 400 |
| 1 | 14 401 | ACTTTCTGACCACGGTCATTCAAACAATGACTACAGCCCGGGGGAGGCAAGCACACAGA   | 14 460 |
|   |        |                                                               |        |
| 2 | 14 401 | ACTTTCTGACCACGGTCATTCAAACAATGACTACAGCCCGGGGGAGGCAAGCACACAGA   | 14 460 |
| 1 | 14 461 | CCATCAATCTTGACGACCGGTTCGCACTGGGGCGGCGACCTGAAAACCATCCTGCATACCA | 14 520 |
|   |        |                                                               |        |
| 2 | 14 461 | CCATCAATCTTGACGACCGGTTCGCACTGGGGCGGCGACCTGAAAACCATCCTGCATACCA | 14 520 |
| 1 | 14 521 | ACATGCCAAATGTGAACGAGTTCATGTTTACCAATAAGTTTAAGGCGCGGGTGATGGTGT  | 14 580 |
|   |        |                                                               |        |
| 2 | 14 521 | ACATGCCAAATGTGAACGAGTTCATGTTTACCAATAAGTTTAAGGCGCGGGTGATGGTGT  | 14 580 |
| 1 | 14 581 | CGCGCTTGCCCTACTAAGGACAATCAGGTGGAGCTGAAATACGAGTGGGTGGAGTTCACGC | 14 640 |
|   |        |                                                               |        |
| 2 | 14 581 | CGCGCTTGCCCTACTAAGGACAATCAGGTGGAGCTGAAATACGAGTGGGTGGAGTTCACGC | 14 640 |
| 1 | 14 641 | TGCCCCGAGGGCAACTACTCCGAGACCATGACCATAGACCTTATGAACAACGCGATCGTGG | 14 700 |
|   |        |                                                               |        |
| 2 | 14 641 | TGCCCCGAGGGCAACTACTCCGAGACCATGACCATAGACCTTATGAACAACGCGATCGTGG | 14 700 |
| 1 | 14 701 | AGCACTACTTGAAAGTGGGCAGACAGAACGGGGTTCTGGAAAGCGACATCGGGGTAAAGT  | 14 760 |
|   |        |                                                               |        |
| 2 | 14 701 | AGCACTACTTGAAAGTGGGCAGACAGAACGGGGTTCTGGAAAGCGACATCGGGGTAAAGT  | 14 760 |
| 1 | 14 761 | TTGACACCCGCAACTTCAGACTGGGGTTTGACCCCGTCACTGGTCTTGTTCATGCCTGGGG | 14 820 |
|   |        |                                                               |        |
| 2 | 14 761 | TTGACACCCGCAACTTCAGACTGGGGTTTGACCCCGTCACTGGTCTTGTTCATGCCTGGGG | 14 820 |
| 1 | 14 821 | TATATACAAACGAAGCCTTCCATCCAGACATCATTTTGCTGCCAGGATGCGGGGTGGACT  | 14 880 |
|   |        |                                                               |        |
| 2 | 14 821 | TATATACAAACGAAGCCTTCCATCCAGACATCATTTTGCTGCCAGGATGCGGGGTGGACT  | 14 880 |
| 1 | 14 881 | TCACCCACAGCCGCCTGAGCAACTTGTTGGGCATCCGCAAGCGGCAACCCTTCCAGGAGG  | 14 940 |
|   |        |                                                               |        |
| 2 | 14 881 | TCACCCACAGCCGCCTGAGCAACTTGTTGGGCATCCGCAAGCGGCAACCCTTCCAGGAGG  | 14 940 |

|   |        |                                                                |        |
|---|--------|----------------------------------------------------------------|--------|
| 1 | 14 941 | GCTTTAGGATCACCTACGATGATCTGGAGGGTGGTAACATTCCC                   | 15 000 |
|   |        |                                                                |        |
| 2 | 14 941 | GCTTTAGGATCACCTACGATGATCTGGAGGGTGGTAACATTCCC                   | 15 000 |
|   |        |                                                                |        |
| 1 | 15 001 | ACGCCTACCAGGCGAGCTTGAAAGATGACACCGAACAGGGCGGGGGTGGCGCAGGCGGCA   | 15 060 |
|   |        |                                                                |        |
| 2 | 15 001 | ACGCCTACCAGGCGAGCTTGAAAGATGACACCGAACAGGGCGGGGGTGGCGCAGGCGGCA   | 15 060 |
|   |        |                                                                |        |
| 1 | 15 061 | GCAACAGCAGTGGCAGCGGCGCGGAAGAGA                                 | 15 120 |
|   |        |                                                                |        |
| 2 | 15 061 | GCAACAGCAGTGGCAGCGGCGCGGAAGAGA                                 | 15 120 |
|   |        |                                                                |        |
| 1 | 15 121 | CGGTGGAGGACATGAACGATCATGCCATTCGCGGCGACACCTTTGCCACACGGGCTGAGG   | 15 180 |
|   |        |                                                                |        |
| 2 | 15 121 | CGGTGGAGGACATGAACGATCATGCCATTCGCGGCGACACCTTTGCCACACGGGCTGAGG   | 15 180 |
|   |        |                                                                |        |
| 1 | 15 181 | AGAAGCGCGCTGAGGCCGAAGCAGCGGCCGAAGCTGCCGCCCGCTGCGCAACCCGAGG     | 15 240 |
|   |        |                                                                |        |
| 2 | 15 181 | AGAAGCGCGCTGAGGCCGAAGCAGCGGCCGAAGCTGCCGCCCGCTGCGCAACCCGAGG     | 15 240 |
|   |        |                                                                |        |
| 1 | 15 241 | TCGAGAAGCCTCAGAAGAAACCGGTGATCAAACCCCTGACAGAGGACAGCAAGAAACGCA   | 15 300 |
|   |        |                                                                |        |
| 2 | 15 241 | TCGAGAAGCCTCAGAAGAAACCGGTGATCAAACCCCTGACAGAGGACAGCAAGAAACGCA   | 15 300 |
|   |        |                                                                |        |
| 1 | 15 301 | GTTACAACCTAATAAGCAATGACAGCACCTTCACCCAGTACCGCAGCTGGTACCTTGCAT   | 15 360 |
|   |        |                                                                |        |
| 2 | 15 301 | GTTACAACCTAATAAGCAATGACAGCACCTTCACCCAGTACCGCAGCTGGTACCTTGCAT   | 15 360 |
|   |        |                                                                |        |
| 1 | 15 361 | ACAACCTACGGCGACCCCTCAGACCGGAATCCGCTCATGGACCCTGCTTTGCACTCCTGACG | 15 420 |
|   |        |                                                                |        |
| 2 | 15 361 | ACAACCTACGGCGACCCCTCAGACCGGAATCCGCTCATGGACCCTGCTTTGCACTCCTGACG | 15 420 |
|   |        |                                                                |        |
| 1 | 15 421 | TAACCTGCGGCTCGGAGCAGGTCTACTGGTCGTTGCCAGACATGATGCAAGACCCCGTGA   | 15 480 |
|   |        |                                                                |        |
| 2 | 15 421 | TAACCTGCGGCTCGGAGCAGGTCTACTGGTCGTTGCCAGACATGATGCAAGACCCCGTGA   | 15 480 |
|   |        |                                                                |        |
| 1 | 15 481 | CCTTCCGCTCCACGCGCCAGATCAGCAACTTTCCGGTGGTGGGCGCCGAGCTGTTGCCCG   | 15 540 |
|   |        |                                                                |        |
| 2 | 15 481 | CCTTCCGCTCCACGCGCCAGATCAGCAACTTTCCGGTGGTGGGCGCCGAGCTGTTGCCCG   | 15 540 |
|   |        |                                                                |        |

|   |        |                                                               |        |
|---|--------|---------------------------------------------------------------|--------|
| 1 | 15 541 | TGCACTCCAAGAGCTTCTACAACGACCAGGCCGTCTACTCCCAACTCATCCGCCAGTTTA  | 15 600 |
|   |        |                                                               |        |
| 2 | 15 541 | TGCACTCCAAGAGCTTCTACAACGACCAGGCCGTCTACTCCCAACTCATCCGCCAGTTTA  | 15 600 |
| 1 | 15 601 | CCTCTCTGACCCACGTGTTCAATCGCTTTCCCGAGAACCAGATTTTGGCGCGCCCGCCAG  | 15 660 |
|   |        |                                                               |        |
| 2 | 15 601 | CCTCTCTGACCCACGTGTTCAATCGCTTTCCCGAGAACCAGATTTTGGCGCGCCCGCCAG  | 15 660 |
| 1 | 15 661 | CCCCCACCATCACCACCGTCAGTGAAAACGTTCTGCTCTCACAGATCACGGGACGCTAC   | 15 720 |
|   |        |                                                               |        |
| 2 | 15 661 | CCCCCACCATCACCACCGTCAGTGAAAACGTTCTGCTCTCACAGATCACGGGACGCTAC   | 15 720 |
| 1 | 15 721 | CGCTGCGCAACAGCATCGGAGGAGTCCAGCGAGTGACCATTACTGACGCCAGACGCCGCA  | 15 780 |
|   |        |                                                               |        |
| 2 | 15 721 | CGCTGCGCAACAGCATCGGAGGAGTCCAGCGAGTGACCATTACTGACGCCAGACGCCGCA  | 15 780 |
| 1 | 15 781 | CCTGCCCTACGTTTACAAGGCCCTGGGCATAGTCTCGCCGCGCGTCCTATCGAGCCGCA   | 15 840 |
|   |        |                                                               |        |
| 2 | 15 781 | CCTGCCCTACGTTTACAAGGCCCTGGGCATAGTCTCGCCGCGCGTCCTATCGAGCCGCA   | 15 840 |
| 1 | 15 841 | CTTTTTGAGCAAGCATGTCCATCCTTATATCGCCAGCAATAACACAGGCTGGGGCCTGC   | 15 900 |
|   |        |                                                               |        |
| 2 | 15 841 | CTTTTTGAGCAAGCATGTCCATCCTTATATCGCCAGCAATAACACAGGCTGGGGCCTGC   | 15 900 |
| 1 | 15 901 | GCTTCCAAGCAAGATGTTTGGCGGGGCCAAGAAGCGCTCCGACCAACACCCAGTGCGCG   | 15 960 |
|   |        |                                                               |        |
| 2 | 15 901 | GCTTCCAAGCAAGATGTTTGGCGGGGCCAAGAAGCGCTCCGACCAACACCCAGTGCGCG   | 15 960 |
| 1 | 15 961 | TGCGCGGGGCACTACCGCGCGCCCTGGGGCGCGCACAAACGCGGCCGCACTGGGGCGACCA | 16 020 |
|   |        |                                                               |        |
| 2 | 15 961 | TGCGCGGGGCACTACCGCGCGCCCTGGGGCGCGCACAAACGCGGCCGCACTGGGGCGACCA | 16 020 |
| 1 | 16 021 | CCGTGATGACGCCATCGACGCGGTGGTGGAGGAGGCGCGCAACTACACGCCACGCCGC    | 16 080 |
|   |        |                                                               |        |
| 2 | 16 021 | CCGTGATGACGCCATCGACGCGGTGGTGGAGGAGGCGCGCAACTACACGCCACGCCGC    | 16 080 |
| 1 | 16 081 | CACCAGTGTCCACAGTGGACGCGGCCATTTCAGACCGTGGTGC GCGGAGCCGGCGCTATG | 16 140 |
|   |        |                                                               |        |
| 2 | 16 081 | CACCAGTGTCCACAGTGGACGCGGCCATTTCAGACCGTGGTGC GCGGAGCCGGCGCTATG | 16 140 |

|   |        |                                                                  |        |
|---|--------|------------------------------------------------------------------|--------|
| 1 | 16 141 | CTAAAATGAAGAGACGGCGGAGGGCGCGTAGCACGTCGCCACCGCCGCGCCGACCCGGGCACTG | 16 200 |
|   |        |                                                                  |        |
| 2 | 16 141 | CTAAAATGAAGAGACGGCGGAGGGCGCGTAGCACGTCGCCACCGCCGCGCCGACCCGGGCACTG | 16 200 |
| 1 | 16 201 | CCGCCCAACGCGCGGGCGGGCCCTGCTTAACCGCGCACGTCGCACCGGCGACGGGGCGG      | 16 260 |
|   |        |                                                                  |        |
| 2 | 16 201 | CCGCCCAACGCGCGGGCGGGCCCTGCTTAACCGCGCACGTCGCACCGGCGACGGGGCGG      | 16 260 |
| 1 | 16 261 | CCATGCGGGCCGCTCGAAGGCTGGCCGCGGGTATTGTCACTGTGCCCCCGAGGTCCAGGC     | 16 320 |
|   |        |                                                                  |        |
| 2 | 16 261 | CCATGCGGGCCGCTCGAAGGCTGGCCGCGGGTATTGTCACTGTGCCCCCGAGGTCCAGGC     | 16 320 |
| 1 | 16 321 | GACGAGCGGCCGCCGCGAGCAGCCGCGGCCATTAGTGCTATGACTCAGGGTCGCAGGGGCA    | 16 380 |
|   |        |                                                                  |        |
| 2 | 16 321 | GACGAGCGGCCGCCGCGAGCAGCCGCGGCCATTAGTGCTATGACTCAGGGTCGCAGGGGCA    | 16 380 |
| 1 | 16 381 | ACGTGTATTGGGTGCGCGACTCGGTTAGCGGCCTGCGCGTGCCCGTGCGCACCCGCCCCC     | 16 440 |
|   |        |                                                                  |        |
| 2 | 16 381 | ACGTGTATTGGGTGCGCGACTCGGTTAGCGGCCTGCGCGTGCCCGTGCGCACCCGCCCCC     | 16 440 |
| 1 | 16 441 | CGCGCAACTAGATTGCAAGAAAAAACTACTTAGACTCGTACTGTTGTATGTATCCAGCGG     | 16 500 |
|   |        |                                                                  |        |
| 2 | 16 441 | CGCGCAACTAGATTGCAAGAAAAAACTACTTAGACTCGTACTGTTGTATGTATCCAGCGG     | 16 500 |
| 1 | 16 501 | CGGCGGCGCGCAACGAAGCTATGTCCAAGCGCAAAATCAAAGAAGAGATGCTCCAGGTCA     | 16 560 |
|   |        |                                                                  |        |
| 2 | 16 501 | CGGCGGCGCGCAACGAAGCTATGTCCAAGCGCAAAATCAAAGAAGAGATGCTCCAGGTCA     | 16 560 |
| 1 | 16 561 | TCGCGCCGGAGATCTATGGCCCCCGAAGAAGGAAGAGCAGGATTACAAGCCCCGAAAGC      | 16 620 |
|   |        |                                                                  |        |
| 2 | 16 561 | TCGCGCCGGAGATCTATGGCCCCCGAAGAAGGAAGAGCAGGATTACAAGCCCCGAAAGC      | 16 620 |
| 1 | 16 621 | TAAAGCGGGTCAAAAAGAAAAAGAAAGATGATGATGATGAACTTGACGACGAGGTGGAAC     | 16 680 |
|   |        |                                                                  |        |
| 2 | 16 621 | TAAAGCGGGTCAAAAAGAAAAAGAAAGATGATGATGATGAACTTGACGACGAGGTGGAAC     | 16 680 |
| 1 | 16 681 | TGCTGCACGCTACCGCGCCAGGCGACGGGTACAGTGGAAGGTCGACGCGTAAAACGTG       | 16 740 |
|   |        |                                                                  |        |
| 2 | 16 681 | TGCTGCACGCTACCGCGCCAGGCGACGGGTACAGTGGAAGGTCGACGCGTAAAACGTG       | 16 740 |

|   |        |                                                                   |        |
|---|--------|-------------------------------------------------------------------|--------|
| 1 | 16 741 | TTTTGCGACCCGGCACCACCGTAGTCTTTACGCCCGGTGAGCGCTCCACCCGCACCTACA<br>  | 16 800 |
| 2 | 16 741 | TTTTGCGACCCGGCACCACCGTAGTCTTTACGCCCGGTGAGCGCTCCACCCGCACCTACA      | 16 800 |
| 1 | 16 801 | AGCGCGTGTATGATGAGGTGTACGGCGACGAGGACCTGCTTGAGCAGGCCAACGAGCGCC<br>  | 16 860 |
| 2 | 16 801 | AGCGCGTGTATGATGAGGTGTACGGCGACGAGGACCTGCTTGAGCAGGCCAACGAGCGCC      | 16 860 |
| 1 | 16 861 | TCGGGGAGTTTGCCTACGGAAAGCGGCATAAAGGACATGCTGGCGTTGCCGCTGGACGAGG<br> | 16 920 |
| 2 | 16 861 | TCGGGGAGTTTGCCTACGGAAAGCGGCATAAAGGACATGCTGGCGTTGCCGCTGGACGAGG     | 16 920 |
| 1 | 16 921 | GCAACCCAACACCTAGCCTAAAGCCCGTAACACTGCAGCAGGTGCTGCCCGCGCTTGCAC<br>  | 16 980 |
| 2 | 16 921 | GCAACCCAACACCTAGCCTAAAGCCCGTAACACTGCAGCAGGTGCTGCCCGCGCTTGCAC      | 16 980 |
| 1 | 16 981 | CGTCCGAAGAAAAGCGCGGCCTAAAGCGCGAGTCTGGTGACTTGGCACCCACCGTGCAGC<br>  | 17 040 |
| 2 | 16 981 | CGTCCGAAGAAAAGCGCGGCCTAAAGCGCGAGTCTGGTGACTTGGCACCCACCGTGCAGC      | 17 040 |
| 1 | 17 041 | TGATGGTACCCAAGCGCCAGCGACTGGAAGATGTCTTGGAAAAAATGACCGTGGAACTG<br>   | 17 100 |
| 2 | 17 041 | TGATGGTACCCAAGCGCCAGCGACTGGAAGATGTCTTGGAAAAAATGACCGTGGAACTG       | 17 100 |
| 1 | 17 101 | GGCTGGAGCCCGAGGTCCGCGTGCGGCCAATCAAGCAGGTGGCGCCGGGACTGGGCGTGC<br>  | 17 160 |
| 2 | 17 101 | GGCTGGAGCCCGAGGTCCGCGTGCGGCCAATCAAGCAGGTGGCGCCGGGACTGGGCGTGC      | 17 160 |
| 1 | 17 161 | AGACCGTGGACGTTTCAGATACCCACTACCAGTAGCACCAGTATTGCCACCGCCACAGAGG<br> | 17 220 |
| 2 | 17 161 | AGACCGTGGACGTTTCAGATACCCACTACCAGTAGCACCAGTATTGCCACCGCCACAGAGG     | 17 220 |
| 1 | 17 221 | GCATGGAGACACAAACGTCCCCGTTGCCTCAGCGGTGGCGGATGCCGCGGTGCAGGCGG<br>   | 17 280 |
| 2 | 17 221 | GCATGGAGACACAAACGTCCCCGTTGCCTCAGCGGTGGCGGATGCCGCGGTGCAGGCGG       | 17 280 |
| 1 | 17 281 | TCGCTGCGGCCGCGTCCAAGACCTCTACGGAGGTGCAAACGGACCCGTGGATGTTTCGCG<br>  | 17 340 |
| 2 | 17 281 | TCGCTGCGGCCGCGTCCAAGACCTCTACGGAGGTGCAAACGGACCCGTGGATGTTTCGCG      | 17 340 |

|   |        |                                                              |        |
|---|--------|--------------------------------------------------------------|--------|
| 1 | 17 341 | TTTCAGCCCCCGGCGCCCGCGCCGTTTCGAGGAAGTACGGCGCCGCCAGCGCGCTACTGC | 17 400 |
|   |        |                                                              |        |
| 2 | 17 341 | TTTCAGCCCCCGGCGCCCGCGCCGTTTCGAGGAAGTACGGCGCCGCCAGCGCGCTACTGC | 17 400 |
|   |        |                                                              |        |
| 1 | 17 401 | CCGAATATGCCCTACATCCTTCCATTGCGCCTACCCCCGGCTATCGTGGCTACACCTACC | 17 460 |
|   |        |                                                              |        |
| 2 | 17 401 | CCGAATATGCCCTACATCCTTCCATTGCGCCTACCCCCGGCTATCGTGGCTACACCTACC | 17 460 |
|   |        |                                                              |        |
| 1 | 17 461 | GCCCCAGAAGACGAGCAACTACCCGACGCCGAACCACCACTGGAACCCGCCGCCGCGTC  | 17 520 |
|   |        |                                                              |        |
| 2 | 17 461 | GCCCCAGAAGACGAGCAACTACCCGACGCCGAACCACCACTGGAACCCGCCGCCGCGTC  | 17 520 |
|   |        |                                                              |        |
| 1 | 17 521 | GCCGTCGCCAGCCCGTGCTGGCCCCGATTTCCGTGCGCAGGGTGGCTCGCGAAGGAGGCA | 17 580 |
|   |        |                                                              |        |
| 2 | 17 521 | GCCGTCGCCAGCCCGTGCTGGCCCCGATTTCCGTGCGCAGGGTGGCTCGCGAAGGAGGCA | 17 580 |
|   |        |                                                              |        |
| 1 | 17 581 | GGACCCTGGTGCTGCCAACAGCGCGCTACCACCCAGCATCGTTTAAAAGCCGGTCTTTG  | 17 640 |
|   |        |                                                              |        |
| 2 | 17 581 | GGACCCTGGTGCTGCCAACAGCGCGCTACCACCCAGCATCGTTTAAAAGCCGGTCTTTG  | 17 640 |
|   |        |                                                              |        |
| 1 | 17 641 | TGGTTCTTGCAGATATGGCCCTCACCTGCCGCCTCCGTTTCCCGGTGCCGGGATTCCGAG | 17 700 |
|   |        |                                                              |        |
| 2 | 17 641 | TGGTTCTTGCAGATATGGCCCTCACCTGCCGCCTCCGTTTCCCGGTGCCGGGATTCCGAG | 17 700 |
|   |        |                                                              |        |
| 1 | 17 701 | GAAGAATGCACCGTAGGAGGGGCATGGCCGGCCACGGCCTGACGGGCGGCATGCGTCGTG | 17 760 |
|   |        |                                                              |        |
| 2 | 17 701 | GAAGAATGCACCGTAGGAGGGGCATGGCCGGCCACGGCCTGACGGGCGGCATGCGTCGTG | 17 760 |
|   |        |                                                              |        |
| 1 | 17 761 | CGCACCACCGGCGGCGGCGCGCTCGCACCGTCGCATGCGCGGCGGTATCCTGCCCTCC   | 17 820 |
|   |        |                                                              |        |
| 2 | 17 761 | CGCACCACCGGCGGCGGCGCGCTCGCACCGTCGCATGCGCGGCGGTATCCTGCCCTCC   | 17 820 |
|   |        |                                                              |        |
| 1 | 17 821 | TTATTCCACTGATCGCCGCGGCGATTGGCGCCGTGCCCGGAATTGCATCCGTGGCCTTGC | 17 880 |
|   |        |                                                              |        |
| 2 | 17 821 | TTATTCCACTGATCGCCGCGGCGATTGGCGCCGTGCCCGGAATTGCATCCGTGGCCTTGC | 17 880 |
|   |        |                                                              |        |
| 1 | 17 881 | AGGCGCAGAGACACTGATTA AAAACAAGTTGCATGTGGAAAATCAAATAAAAAGTCTG  | 17 940 |
|   |        |                                                              |        |
| 2 | 17 881 | AGGCGCAGAGACACTGATTA AAAACAAGTTGCATGTGGAAAATCAAATAAAAAGTCTG  | 17 940 |

|   |        |                                                               |        |
|---|--------|---------------------------------------------------------------|--------|
| 1 | 17 941 | GACTCTCACGCTCGCTTGGTCCTGTAAC TATTTTGTAGAATGGAAGACATCAACTTTGCG | 18 000 |
|   |        |                                                               |        |
| 2 | 17 941 | GACTCTCACGCTCGCTTGGTCCTGTAAC TATTTTGTAGAATGGAAGACATCAACTTTGCG | 18 000 |
|   |        |                                                               |        |
| 1 | 18 001 | TCTCTGGCCCCGCGACACGGCTCGCGCCCGTT CATGGGAAACTGGCAAGATATCGGCACC | 18 060 |
|   |        |                                                               |        |
| 2 | 18 001 | TCTCTGGCCCCGCGACACGGCTCGCGCCCGTT CATGGGAAACTGGCAAGATATCGGCACC | 18 060 |
|   |        |                                                               |        |
| 1 | 18 061 | AGCAATATGAGCGGTGGCGCCTTCAGCTGGGGCTCGCTGTGGAGCGGCATTAAAAATTC   | 18 120 |
|   |        |                                                               |        |
| 2 | 18 061 | AGCAATATGAGCGGTGGCGCCTTCAGCTGGGGCTCGCTGTGGAGCGGCATTAAAAATTC   | 18 120 |
|   |        |                                                               |        |
| 1 | 18 121 | GGTTCCACCGTTAAGA ACTATGGCAGCAAGGCCTGGAACAGCAGCACAGGCCAGATGCTG | 18 180 |
|   |        |                                                               |        |
| 2 | 18 121 | GGTTCCACCGTTAAGA ACTATGGCAGCAAGGCCTGGAACAGCAGCACAGGCCAGATGCTG | 18 180 |
|   |        |                                                               |        |
| 1 | 18 181 | AGGGATAAGTTGAAAGAGCAA AATTTCCAACAAAAGGTGGTAGATGGCCTGGCCTCTGGC | 18 240 |
|   |        |                                                               |        |
| 2 | 18 181 | AGGGATAAGTTGAAAGAGCAA AATTTCCAACAAAAGGTGGTAGATGGCCTGGCCTCTGGC | 18 240 |
|   |        |                                                               |        |
| 1 | 18 241 | ATTAGCGGGGTGGTGGACCTGGCCAACCAGGCAGTGCAA AATAAGATTAACAGTAAGCTT | 18 300 |
|   |        |                                                               |        |
| 2 | 18 241 | ATTAGCGGGGTGGTGGACCTGGCCAACCAGGCAGTGCAA AATAAGATTAACAGTAAGCTT | 18 300 |
|   |        |                                                               |        |
| 1 | 18 301 | GATCCCCGCCCTCCCGTAGAGGAGCCTCCACCGGCCGTGGAGACAGTGTCTCCAGAGGGG  | 18 360 |
|   |        |                                                               |        |
| 2 | 18 301 | GATCCCCGCCCTCCCGTAGAGGAGCCTCCACCGGCCGTGGAGACAGTGTCTCCAGAGGGG  | 18 360 |
|   |        |                                                               |        |
| 1 | 18 361 | CGTGGCGAAAAGCGTCCGCGCCCCGACAGGGAAGAAACTCTGGTGACGCAAATAGACGAG  | 18 420 |
|   |        |                                                               |        |
| 2 | 18 361 | CGTGGCGAAAAGCGTCCGCGCCCCGACAGGGAAGAAACTCTGGTGACGCAAATAGACGAG  | 18 420 |
|   |        |                                                               |        |
| 1 | 18 421 | CCTCCCTCGTACGAGGAGGCACTAAAGCAAGGCCTGCCACCACCCGTCCCATCGCGCCC   | 18 480 |
|   |        |                                                               |        |
| 2 | 18 421 | CCTCCCTCGTACGAGGAGGCACTAAAGCAAGGCCTGCCACCACCCGTCCCATCGCGCCC   | 18 480 |
|   |        |                                                               |        |
| 1 | 18 481 | ATGGCTACCGGAGTGCTGGGCCAGCACACACCCGTAACGCTGGACCTGCCTCCCCCGCC   | 18 540 |
|   |        |                                                               |        |
| 2 | 18 481 | ATGGCTACCGGAGTGCTGGGCCAGCACACACCCGTAACGCTGGACCTGCCTCCCCCGCC   | 18 540 |

|   |        |                                                                |        |
|---|--------|----------------------------------------------------------------|--------|
| 1 | 18 541 | GACACCCAGCAGAAACCTGTGCTGCCAGGCCCGACCGCCGTTGTTGTAACCCGTCTAGC    | 18 600 |
|   |        |                                                                |        |
| 2 | 18 541 | GACACCCAGCAGAAACCTGTGCTGCCAGGCCCGACCGCCGTTGTTGTAACCCGTCTAGC    | 18 600 |
| 1 | 18 601 | CGCGCGTCCCTGCGCCGCGCCGCCAGCGGTCCGCGATCGTTGCGGCCCGTAGCCAGTGGC   | 18 660 |
|   |        |                                                                |        |
| 2 | 18 601 | CGCGCGTCCCTGCGCCGCGCCGCCAGCGGTCCGCGATCGTTGCGGCCCGTAGCCAGTGGC   | 18 660 |
| 1 | 18 661 | AACTGGCAAAGCACACTGAACAGCATCGTGGGTCTGGGGTGCAATCCCTGAAGCGCCGA    | 18 720 |
|   |        |                                                                |        |
| 2 | 18 661 | AACTGGCAAAGCACACTGAACAGCATCGTGGGTCTGGGGTGCAATCCCTGAAGCGCCGA    | 18 720 |
| 1 | 18 721 | CGATGCTTCTGATAGCTAACGTGTGTCGTATGTGTGTCATGTATGCGTCCATGTCGCCGCCA | 18 780 |
|   |        |                                                                |        |
| 2 | 18 721 | CGATGCTTCTGATAGCTAACGTGTGTCGTATGTGTGTCATGTATGCGTCCATGTCGCCGCCA | 18 780 |
| 1 | 18 781 | GAGGAGCTGCTGAGCCGCGCGGCCCGCTTTCCAAGATGGCTACCCCTTCGATGATGCC     | 18 840 |
|   |        |                                                                |        |
| 2 | 18 781 | GAGGAGCTGCTGAGCCGCGCGGCCCGCTTTCCAAGATGGCTACCCCTTCGATGATGCC     | 18 840 |
| 1 | 18 841 | GCAGTGGTCTTACATGCACATCTCGGGCCAGGACGCCTCGGAGTACCTGAGCCCCGGGCT   | 18 900 |
|   |        |                                                                |        |
| 2 | 18 841 | GCAGTGGTCTTACATGCACATCTCGGGCCAGGACGCCTCGGAGTACCTGAGCCCCGGGCT   | 18 900 |
| 1 | 18 901 | GGTGCAGTTTGCCCGCGCCACCGAGACGTACTTCAGCCTGAATAACAAGTTTAGAAACCC   | 18 960 |
|   |        |                                                                |        |
| 2 | 18 901 | GGTGCAGTTTGCCCGCGCCACCGAGACGTACTTCAGCCTGAATAACAAGTTTAGAAACCC   | 18 960 |
| 1 | 18 961 | CACGGTGGCGCCTACGCACGACGTGACCACAGACCGGTCCCAGCGTTTGACGCTGCGGTT   | 19 020 |
|   |        |                                                                |        |
| 2 | 18 961 | CACGGTGGCGCCTACGCACGACGTGACCACAGACCGGTCCCAGCGTTTGACGCTGCGGTT   | 19 020 |
| 1 | 19 021 | CATCCCTGTGGACCGTGAGGATACTGCGTACTCGTACAAGGCGCGGTTACCCCTAGCTGT   | 19 080 |
|   |        |                                                                |        |
| 2 | 19 021 | CATCCCTGTGGACCGTGAGGATACTGCGTACTCGTACAAGGCGCGGTTACCCCTAGCTGT   | 19 080 |
| 1 | 19 081 | GGGTGATAACCGTGTGCTGGACATGGCTTCCACGTACTTTGACATCCGCGGCGTGCTGGA   | 19 140 |
|   |        |                                                                |        |
| 2 | 19 081 | GGGTGATAACCGTGTGCTGGACATGGCTTCCACGTACTTTGACATCCGCGGCGTGCTGGA   | 19 140 |



|   |        |                                                              |        |
|---|--------|--------------------------------------------------------------|--------|
| 1 | 19 141 | CAGGGGCCCTACTTTTAAGCCCTACTCTGGCACTGCCTACAACGCCCTGGCTCCCAAGGG | 19 200 |
|   |        |                                                              |        |
| 2 | 19 141 | CAGGGGCCCTACTTTTAAGCCCTACTCTGGCACTGCCTACAACGCCCTGGCTCCCAAGGG | 19 200 |
| 1 | 19 201 | TGCCCCAAATCCTTGCGAATGGGATGAAGCTGCTACTGCTCTTGAAATAAACCTAGAAGA | 19 260 |
|   |        |                                                              |        |
| 2 | 19 201 | TGCCCCAAATCCTTGCGAATGGGATGAAGCTGCTACTGCTCTTGAAATAAACCTAGAAGA | 19 260 |
| 1 | 19 261 | AGAGGACGATGACAACGAAGACGAAGTAGACGAGCAAGCTGAGCAGCAAAAACTCACGT  | 19 320 |
|   |        |                                                              |        |
| 2 | 19 261 | AGAGGACGATGACAACGAAGACGAAGTAGACGAGCAAGCTGAGCAGCAAAAACTCACGT  | 19 320 |
| 1 | 19 321 | ATTTGGGCAGGCGCCTTATTCTGGTATAAATATTACAAAGGAGGGTATTCAAATAGGTGT | 19 380 |
|   |        |                                                              |        |
| 2 | 19 321 | ATTTGGGCAGGCGCCTTATTCTGGTATAAATATTACAAAGGAGGGTATTCAAATAGGTGT | 19 380 |
| 1 | 19 381 | CGAAGGTCAAACACCTAAATATGCCGATAAAACATTTCAACCTGAACCTCAAATAGGAGA | 19 440 |
|   |        |                                                              |        |
| 2 | 19 381 | CGAAGGTCAAACACCTAAATATGCCGATAAAACATTTCAACCTGAACCTCAAATAGGAGA | 19 440 |
| 1 | 19 441 | ATCTCAGTGGTACGAAACAGAAATTAATCATGCAGCTGGGAGAGTCCTAAAAAAGACTAC | 19 500 |
|   |        |                                                              |        |
| 2 | 19 441 | ATCTCAGTGGTACGAAACAGAAATTAATCATGCAGCTGGGAGAGTCCTAAAAAAGACTAC | 19 500 |
| 1 | 19 501 | CCCAATGAAACCATGTTACGGTTCATATGCAAAACCCACAAATGAAAATGGAGGGCAAGG | 19 560 |
|   |        |                                                              |        |
| 2 | 19 501 | CCCAATGAAACCATGTTACGGTTCATATGCAAAACCCACAAATGAAAATGGAGGGCAAGG | 19 560 |
| 1 | 19 561 | CATTCTTGTAAGCAACAAAATGGAAAGCTAGAAAGTCAAGTGGAAATGCAATTTTTCTC  | 19 620 |
|   |        |                                                              |        |
| 2 | 19 561 | CATTCTTGTAAGCAACAAAATGGAAAGCTAGAAAGTCAAGTGGAAATGCAATTTTTCTC  | 19 620 |
| 1 | 19 621 | AACTACTGAGGCAGCCGCAGGCAATGGTGATAACTTGACTCCTAAAGTGGTATTGTACAG | 19 680 |
|   |        |                                                              |        |
| 2 | 19 621 | AACTACTGAGGCAGCCGCAGGCAATGGTGATAACTTGACTCCTAAAGTGGTATTGTACAG | 19 680 |
| 1 | 19 681 | TGAAGATGTAGATATAGAAACCCAGACACTCATATTTCTTACATGCCCACTATTAAGGA  | 19 740 |
|   |        |                                                              |        |
| 2 | 19 681 | TGAAGATGTAGATATAGAAACCCAGACACTCATATTTCTTACATGCCCACTATTAAGGA  | 19 740 |

|   |        |                                                                  |        |
|---|--------|------------------------------------------------------------------|--------|
| 1 | 19 741 | AGGTAAC TCACGAGA ACTAATGGG CCAACAATCTATGCC CAACAGGCCTAATTACATTGC | 19 800 |
|   |        |                                                                  |        |
| 2 | 19 741 | AGGTAAC TCACGAGA ACTAATGGG CCAACAATCTATGCC CAACAGGCCTAATTACATTGC | 19 800 |
| 1 | 19 801 | TTTTAGG GACAATTTTATTGG TCTAATGTATTACA ACAGCACGGGTAATATGGGTGTTCT  | 19 860 |
|   |        |                                                                  |        |
| 2 | 19 801 | TTTTAGG GACAATTTTATTGG TCTAATGTATTACA ACAGCACGGGTAATATGGGTGTTCT  | 19 860 |
| 1 | 19 861 | GGCGGG CCAAGCATCGCAGTTGA ATGCTGTTGTAGATTTGCA AGACAGAAACACAGAGCT  | 19 920 |
|   |        |                                                                  |        |
| 2 | 19 861 | GGCGGG CCAAGCATCGCAGTTGA ATGCTGTTGTAGATTTGCA AGACAGAAACACAGAGCT  | 19 920 |
| 1 | 19 921 | TTCATAC CAGCTTTTTGCTTGATTCC ATTTGGTGATAGAACCAGGTACTTTTCTATGTGGAA | 19 980 |
|   |        |                                                                  |        |
| 2 | 19 921 | TTCATAC CAGCTTTTTGCTTGATTCC ATTTGGTGATAGAACCAGGTACTTTTCTATGTGGAA | 19 980 |
| 1 | 19 981 | TCAGGCT GTTGACAGCTATGATCC AGATGTTAGAATTATTGAAA ATCATGGAACTGAAGA  | 20 040 |
|   |        |                                                                  |        |
| 2 | 19 981 | TCAGGCT GTTGACAGCTATGATCC AGATGTTAGAATTATTGAAA ATCATGGAACTGAAGA  | 20 040 |
| 1 | 20 041 | TGAACTT CCAAATTACTGCTTTT CCACTGGGAGGTGTGATTA ATACAGAGACTCTTACCAA | 20 100 |
|   |        |                                                                  |        |
| 2 | 20 041 | TGAACTT CCAAATTACTGCTTTT CCACTGGGAGGTGTGATTA ATACAGAGACTCTTACCAA | 20 100 |
| 1 | 20 101 | GGTAAAC CTA AAAACAGGTCAGGAAA ATGGATGGGAAA AAGATGCTACAGAATTTTCAGA | 20 160 |
|   |        |                                                                  |        |
| 2 | 20 101 | GGTAAAC CTA AAAACAGGTCAGGAAA ATGGATGGGAAA AAGATGCTACAGAATTTTCAGA | 20 160 |
| 1 | 20 161 | TAAAAAT GAAATAAGAGTTGG AAATAATTTTGCCATGG AAATCAATCTAAATGCCAACCT  | 20 220 |
|   |        |                                                                  |        |
| 2 | 20 161 | TAAAAAT GAAATAAGAGTTGG AAATAATTTTGCCATGG AAATCAATCTAAATGCCAACCT  | 20 220 |
| 1 | 20 221 | GTGGAGA AATTTCTGTACTCCA ACATAGCGCTGTATTTGCC CGACAAGCTAAAGTACAG   | 20 280 |
|   |        |                                                                  |        |
| 2 | 20 221 | GTGGAGA AATTTCTGTACTCCA ACATAGCGCTGTATTTGCC CGACAAGCTAAAGTACAG   | 20 280 |
| 1 | 20 281 | TCCTTCC AACGTAAAAATTTCTG ATAACCCAAACACCTACG ACTACATGAACAAGCGAGT  | 20 340 |
|   |        |                                                                  |        |
| 2 | 20 281 | TCCTTCC AACGTAAAAATTTCTG ATAACCCAAACACCTACG ACTACATGAACAAGCGAGT  | 20 340 |

|   |        |                                                                    |        |
|---|--------|--------------------------------------------------------------------|--------|
| 1 | 20 341 | GGTGGCTCCC GGGCTAGTGGACTGCTACATTAACCTTGGAGCACGCTGGTCCCTTGACTA      | 20 400 |
| 2 | 20 341 | <br>GGTGGCTCCC GGGCTAGTGGACTGCTACATTAACCTTGGAGCACGCTGGTCCCTTGACTA  | 20 400 |
|   |        |                                                                    |        |
| 1 | 20 401 | TATGGACAACGTCAACCCATTTAACCACCACC GCAATGCTGGCCTGCGCTACCGCTCAAT      | 20 460 |
| 2 | 20 401 | <br>TATGGACAACGTCAACCCATTTAACCACCACC GCAATGCTGGCCTGCGCTACCGCTCAAT  | 20 460 |
|   |        |                                                                    |        |
| 1 | 20 461 | GTTGCTGGGCAATGGTCGCTATGTGCCCTTCCACATCCAGGTGCCTCAGAAGTTCTTTGC       | 20 520 |
| 2 | 20 461 | <br>GTTGCTGGGCAATGGTCGCTATGTGCCCTTCCACATCCAGGTGCCTCAGAAGTTCTTTGC   | 20 520 |
|   |        |                                                                    |        |
| 1 | 20 521 | CATTA AAAACCTCCTTCTCCTGCCGGGCTCATACACCTACGAGTGGA ACTTCAGGAAGGA     | 20 580 |
| 2 | 20 521 | <br>CATTA AAAACCTCCTTCTCCTGCCGGGCTCATACACCTACGAGTGGA ACTTCAGGAAGGA | 20 580 |
|   |        |                                                                    |        |
| 1 | 20 581 | TGTTAACATGGTTCTGCAGAGCTCCCTAGGAAATGACCTAAGGGTTGACGGAGCCAGCAT       | 20 640 |
| 2 | 20 581 | <br>TGTTAACATGGTTCTGCAGAGCTCCCTAGGAAATGACCTAAGGGTTGACGGAGCCAGCAT   | 20 640 |
|   |        |                                                                    |        |
| 1 | 20 641 | TAAGTTTGATAGC ATTTGCCTTTACGCCACCTTCTTCCCATGGCCACAACACCGCCTC        | 20 700 |
| 2 | 20 641 | <br>TAAGTTTGATAGC ATTTGCCTTTACGCCACCTTCTTCCCATGGCCACAACACCGCCTC    | 20 700 |
|   |        |                                                                    |        |
| 1 | 20 701 | CACGCTTGAGGCCATGCTTAGAAACGACACCAACGACCAGTCCTTTAACGACTATCTCTC       | 20 760 |
| 2 | 20 701 | <br>CACGCTTGAGGCCATGCTTAGAAACGACACCAACGACCAGTCCTTTAACGACTATCTCTC   | 20 760 |
|   |        |                                                                    |        |
| 1 | 20 761 | CGCCGCCAACATGCTCTACCCTATACCCGCCAACGCTACCAACGTGCCCATATCCATCCC       | 20 820 |
| 2 | 20 761 | <br>CGCCGCCAACATGCTCTACCCTATACCCGCCAACGCTACCAACGTGCCCATATCCATCCC   | 20 820 |
|   |        |                                                                    |        |
| 1 | 20 821 | CTCCCGCAACTGGGCGGCTTTCCGCGGCTGGGCCTTACGCGCCTTAAGACTAAGGAAAC        | 20 880 |
| 2 | 20 821 | <br>CTCCCGCAACTGGGCGGCTTTCCGCGGCTGGGCCTTACGCGCCTTAAGACTAAGGAAAC    | 20 880 |
|   |        |                                                                    |        |
| 1 | 20 881 | CCCATCACTGGGCTCGGGCTACGACCCTTATTACACCTACTCTGGCTCTATACCCTACCT       | 20 940 |
| 2 | 20 881 | <br>CCCATCACTGGGCTCGGGCTACGACCCTTATTACACCTACTCTGGCTCTATACCCTACCT   | 20 940 |

|   |        |                                                               |        |
|---|--------|---------------------------------------------------------------|--------|
| 1 | 20 941 | AGATGGAACCTTTTACCTCAACCACACCTTTAAGAAGGTGGCCATTACCTTTGACTCTTC  | 21 000 |
|   |        |                                                               |        |
| 2 | 20 941 | AGATGGAACCTTTTACCTCAACCACACCTTTAAGAAGGTGGCCATTACCTTTGACTCTTC  | 21 000 |
|   |        |                                                               |        |
| 1 | 21 001 | TGTCAGCTGGCCTGGCAATGACCGCCTGCTTACCCCAACGAGTTTGAATTAAGCGCTC    | 21 060 |
|   |        |                                                               |        |
| 2 | 21 001 | TGTCAGCTGGCCTGGCAATGACCGCCTGCTTACCCCAACGAGTTTGAATTAAGCGCTC    | 21 060 |
|   |        |                                                               |        |
| 1 | 21 061 | AGTTGACGGGGAGGGTTACAACGTTGCCAGTGTAACATGACCAAAGACTGGTTCCTGGT   | 21 120 |
|   |        |                                                               |        |
| 2 | 21 061 | AGTTGACGGGGAGGGTTACAACGTTGCCAGTGTAACATGACCAAAGACTGGTTCCTGGT   | 21 120 |
|   |        |                                                               |        |
| 1 | 21 121 | ACAAATGCTAGCTAACTATAACATTGGCTACCAGGGCTTCTATATCCAGAGAGCTACAA   | 21 180 |
|   |        |                                                               |        |
| 2 | 21 121 | ACAAATGCTAGCTAACTATAACATTGGCTACCAGGGCTTCTATATCCAGAGAGCTACAA   | 21 180 |
|   |        |                                                               |        |
| 1 | 21 181 | GGACCGCATGTACTCCTTCTTTAGAACTTCCAGCCCATGAGCCGTCAGGTGGTGGATGA   | 21 240 |
|   |        |                                                               |        |
| 2 | 21 181 | GGACCGCATGTACTCCTTCTTTAGAACTTCCAGCCCATGAGCCGTCAGGTGGTGGATGA   | 21 240 |
|   |        |                                                               |        |
| 1 | 21 241 | TACTAAATACAAGGACTACCAACAGGTGGGCATCCTACACCAACACAACAACCTCTGGATT | 21 300 |
|   |        |                                                               |        |
| 2 | 21 241 | TACTAAATACAAGGACTACCAACAGGTGGGCATCCTACACCAACACAACAACCTCTGGATT | 21 300 |
|   |        |                                                               |        |
| 1 | 21 301 | TGTTGGCTACCTTGCCCCACCATGCGCGAAGGACAGGCCTACCCTGCTAACTTCCCCTA   | 21 360 |
|   |        |                                                               |        |
| 2 | 21 301 | TGTTGGCTACCTTGCCCCACCATGCGCGAAGGACAGGCCTACCCTGCTAACTTCCCCTA   | 21 360 |
|   |        |                                                               |        |
| 1 | 21 361 | TCCGCTTATAGGCAAGACCGCAGTTGACAGCATTACCCAGAAAAAGTTTCTTTGCGATCG  | 21 420 |
|   |        |                                                               |        |
| 2 | 21 361 | TCCGCTTATAGGCAAGACCGCAGTTGACAGCATTACCCAGAAAAAGTTTCTTTGCGATCG  | 21 420 |
|   |        |                                                               |        |
| 1 | 21 421 | CACCCTTTGCGCATCCATTCTCCAGTAACTTTATGTCCATGGGCGCACTCACAGACCT    | 21 480 |
|   |        |                                                               |        |
| 2 | 21 421 | CACCCTTTGCGCATCCATTCTCCAGTAACTTTATGTCCATGGGCGCACTCACAGACCT    | 21 480 |
|   |        |                                                               |        |
| 1 | 21 481 | GGGCCAAAACCTTCTCTACGCCAACTCCGCCACGCGCTAGACATGACTTTTGAGGTGGA   | 21 540 |
|   |        |                                                               |        |
| 2 | 21 481 | GGGCCAAAACCTTCTCTACGCCAACTCCGCCACGCGCTAGACATGACTTTTGAGGTGGA   | 21 540 |

|   |        |                                                                  |        |
|---|--------|------------------------------------------------------------------|--------|
| 1 | 21 541 | TCCCATGGACGAGCCACCCCTTCTTTATGTTTTGTTTGAAGTCTTTGACGTGGTCCGTGT<br> | 21 600 |
| 2 | 21 541 | TCCCATGGACGAGCCACCCCTTCTTTATGTTTTGTTTGAAGTCTTTGACGTGGTCCGTGT     | 21 600 |
| 1 | 21 601 | GCACCAGCCGCACCGCGGCGTCATCGAAACCGTGACCTGCGCACGCCCTTCTCGGCCGG<br>  | 21 660 |
| 2 | 21 601 | GCACCAGCCGCACCGCGGCGTCATCGAAACCGTGACCTGCGCACGCCCTTCTCGGCCGG      | 21 660 |
| 1 | 21 661 | CAACGCCACAACATAAAGAAGCAAGCAACATCAACAACAGCTGCCGCCATGGGCTCCAGT<br> | 21 720 |
| 2 | 21 661 | CAACGCCACAACATAAAGAAGCAAGCAACATCAACAACAGCTGCCGCCATGGGCTCCAGT     | 21 720 |
| 1 | 21 721 | GAGCAGGAACTGAAAGCCATTGTCAAAGATCTTGTTGTGGGCCATATTTTTTGGGCACC<br>  | 21 780 |
| 2 | 21 721 | GAGCAGGAACTGAAAGCCATTGTCAAAGATCTTGTTGTGGGCCATATTTTTTGGGCACC      | 21 780 |
| 1 | 21 781 | TATGACAAGCGCTTTCCAGGCTTTGTTTCTCCACACAAGCTCGCCTGCGCCATAGTCAAT<br> | 21 840 |
| 2 | 21 781 | TATGACAAGCGCTTTCCAGGCTTTGTTTCTCCACACAAGCTCGCCTGCGCCATAGTCAAT     | 21 840 |
| 1 | 21 841 | ACGGCCGGTCGCGAGACTGGGGGCGTACACTGGATGGCCTTTGCCTGGAACCCGCACTCA<br> | 21 900 |
| 2 | 21 841 | ACGGCCGGTCGCGAGACTGGGGGCGTACACTGGATGGCCTTTGCCTGGAACCCGCACTCA     | 21 900 |
| 1 | 21 901 | AAAACATGCTACCTCTTTGAGCCCTTTGGCTTTTCTGACCAGCGACTCAAGCAGGTTTAC<br> | 21 960 |
| 2 | 21 901 | AAAACATGCTACCTCTTTGAGCCCTTTGGCTTTTCTGACCAGCGACTCAAGCAGGTTTAC     | 21 960 |
| 1 | 21 961 | CAGTTTGAGTACGAGTCACTCCTGCGCCGTAGCGCCATTGCTTCTTCCCCGACCGCTGT<br>  | 22 020 |
| 2 | 21 961 | CAGTTTGAGTACGAGTCACTCCTGCGCCGTAGCGCCATTGCTTCTTCCCCGACCGCTGT      | 22 020 |
| 1 | 22 021 | ATAACGCTGGAAAAGTCCACCCAAAGCGTACAGGGGCCCAACTCGGCCGCCTGTGGACTA<br> | 22 080 |
| 2 | 22 021 | ATAACGCTGGAAAAGTCCACCCAAAGCGTACAGGGGCCCAACTCGGCCGCCTGTGGACTA     | 22 080 |
| 1 | 22 081 | TTCTGCTGCATGTTTCTCCACGCCTTTGCCAACTGGCCCCAAACTCCCATGGATCACAAC<br> | 22 140 |
| 2 | 22 081 | TTCTGCTGCATGTTTCTCCACGCCTTTGCCAACTGGCCCCAAACTCCCATGGATCACAAC     | 22 140 |

|   |        |                                                                |        |
|---|--------|----------------------------------------------------------------|--------|
| 1 | 22 141 | CCCACCATGAACCTTATTACCGGGGTACCCAACCTCCATGCTCAACAGTCCCCAGGTACAG  | 22 200 |
| 2 | 22 141 |                                                                |        |
| 2 | 22 141 | CCCACCATGAACCTTATTACCGGGGTACCCAACCTCCATGCTCAACAGTCCCCAGGTACAG  | 22 200 |
| 1 | 22 201 | CCCACCCTGCGTCGCAACCAGGAACAGCTCTACAGCTTCCTGGAGCGCCACTCGCCCTAC   | 22 260 |
| 2 | 22 201 |                                                                |        |
| 2 | 22 201 | CCCACCCTGCGTCGCAACCAGGAACAGCTCTACAGCTTCCTGGAGCGCCACTCGCCCTAC   | 22 260 |
| 1 | 22 261 | TTCCGCAGCCACAGTGCGCAGATTAGGAGCGCCACTTCTTTTTGTCACCTGAAAAACATG   | 22 320 |
| 2 | 22 261 |                                                                |        |
| 2 | 22 261 | TTCCGCAGCCACAGTGCGCAGATTAGGAGCGCCACTTCTTTTTGTCACCTGAAAAACATG   | 22 320 |
| 1 | 22 321 | TAAAAATAATGTACTAGAGACACTTTCAATAAAGGCCAAATGCTTTTTATTTGTACACTCTC | 22 380 |
| 2 | 22 321 |                                                                |        |
| 2 | 22 321 | TAAAAATAATGTACTAGAGACACTTTCAATAAAGGCCAAATGCTTTTTATTTGTACACTCTC | 22 380 |
| 1 | 22 381 | GGGTGATTATTTACCCCCACCCTTGCCGTCTGCGCCGTTTAAAAATCAAAGGGGTTCTGC   | 22 440 |
| 2 | 22 381 |                                                                |        |
| 2 | 22 381 | GGGTGATTATTTACCCCCACCCTTGCCGTCTGCGCCGTTTAAAAATCAAAGGGGTTCTGC   | 22 440 |
| 1 | 22 441 | CGCGCATCGCTATGCGCCACTGGCAGGGACACGTTGCGATACTGGTGTTTAGTGCTCCAC   | 22 500 |
| 2 | 22 441 |                                                                |        |
| 2 | 22 441 | CGCGCATCGCTATGCGCCACTGGCAGGGACACGTTGCGATACTGGTGTTTAGTGCTCCAC   | 22 500 |
| 1 | 22 501 | TTAAACTCAGGCACAACCATCCGCGGCAGCTCGGTGAAGTTTTCACTCCACAGGCTGCGC   | 22 560 |
| 2 | 22 501 |                                                                |        |
| 2 | 22 501 | TTAAACTCAGGCACAACCATCCGCGGCAGCTCGGTGAAGTTTTCACTCCACAGGCTGCGC   | 22 560 |
| 1 | 22 561 | ACCATCACCAACGCGTTTTAGCAGGTCGGGCGCCGATATCTTGAAGTCGCAGTTGGGGCCT  | 22 620 |
| 2 | 22 561 |                                                                |        |
| 2 | 22 561 | ACCATCACCAACGCGTTTTAGCAGGTCGGGCGCCGATATCTTGAAGTCGCAGTTGGGGCCT  | 22 620 |
| 1 | 22 621 | CCGCCCTGCGCGCGCGAGTTGCGATACACAGGGTTGCAGCACTGGAACACTATCAGCGCC   | 22 680 |
| 2 | 22 621 |                                                                |        |
| 2 | 22 621 | CCGCCCTGCGCGCGCGAGTTGCGATACACAGGGTTGCAGCACTGGAACACTATCAGCGCC   | 22 680 |
| 1 | 22 681 | GGGTGGTGCACGCTGGCCAGCACGCTCTTGTCGGAGATCAGATCCGCGTCCAGGTCTCC    | 22 740 |
| 2 | 22 681 |                                                                |        |
| 2 | 22 681 | GGGTGGTGCACGCTGGCCAGCACGCTCTTGTCGGAGATCAGATCCGCGTCCAGGTCTCC    | 22 740 |

|   |        |                                                              |        |
|---|--------|--------------------------------------------------------------|--------|
| 1 | 22 741 | GCGTTGCTCAGGGCGAACGGAGTCAACTTTGGTAGCTGCCTTCCCAAAAAGGGCGCGTGC | 22 800 |
|   |        |                                                              |        |
| 2 | 22 741 | GCGTTGCTCAGGGCGAACGGAGTCAACTTTGGTAGCTGCCTTCCCAAAAAGGGCGCGTGC | 22 800 |
| 1 | 22 801 | CCAGGCTTTGAGTTGCACTCGCACCGTAGTGGCATCAAAAGGTGACCGTGCCCGGTCTGG | 22 860 |
|   |        |                                                              |        |
| 2 | 22 801 | CCAGGCTTTGAGTTGCACTCGCACCGTAGTGGCATCAAAAGGTGACCGTGCCCGGTCTGG | 22 860 |
| 1 | 22 861 | GCGTTAGGATACAGCGCCTGCATAAAAGCCTTGATCTGCTTAAAAGCCACCTGAGCCTTT | 22 920 |
|   |        |                                                              |        |
| 2 | 22 861 | GCGTTAGGATACAGCGCCTGCATAAAAGCCTTGATCTGCTTAAAAGCCACCTGAGCCTTT | 22 920 |
| 1 | 22 921 | GCGCCTTCAGAGAAGAACATGCCGCAAGACTTGCCGGAAAAGTATTGGCCGGACAGGCC  | 22 980 |
|   |        |                                                              |        |
| 2 | 22 921 | GCGCCTTCAGAGAAGAACATGCCGCAAGACTTGCCGGAAAAGTATTGGCCGGACAGGCC  | 22 980 |
| 1 | 22 981 | GCGTCGTGCACGCAGCACCTTGCGTCGGTGTGGAGATCTGCACCACATTTGGGCCCCAC  | 23 040 |
|   |        |                                                              |        |
| 2 | 22 981 | GCGTCGTGCACGCAGCACCTTGCGTCGGTGTGGAGATCTGCACCACATTTGGGCCCCAC  | 23 040 |
| 1 | 23 041 | CGGTTCTTCACGATCTTGGCCTTGCTAGACTGCTCCTTCAGCGCGCGCTGCCCGTTTTCG | 23 100 |
|   |        |                                                              |        |
| 2 | 23 041 | CGGTTCTTCACGATCTTGGCCTTGCTAGACTGCTCCTTCAGCGCGCGCTGCCCGTTTTCG | 23 100 |
| 1 | 23 101 | CTCGTCACATCCATTTCAATCACGTGCTCCTTATTTATCATAATGCTTCCGTGTAGACAC | 23 160 |
|   |        |                                                              |        |
| 2 | 23 101 | CTCGTCACATCCATTTCAATCACGTGCTCCTTATTTATCATAATGCTTCCGTGTAGACAC | 23 160 |
| 1 | 23 161 | TTAAGCTCGCCTTCGATCTCAGCGCAGCGGTGCAGCCACAACGCGCAGCCCGTGGGCTCG | 23 220 |
|   |        |                                                              |        |
| 2 | 23 161 | TTAAGCTCGCCTTCGATCTCAGCGCAGCGGTGCAGCCACAACGCGCAGCCCGTGGGCTCG | 23 220 |
| 1 | 23 221 | TGATGCTTGTAGGTACCTCTGCAAACGACTGCAGGTACGCCTGCAGGAATCGCCCCATC  | 23 280 |
|   |        |                                                              |        |
| 2 | 23 221 | TGATGCTTGTAGGTACCTCTGCAAACGACTGCAGGTACGCCTGCAGGAATCGCCCCATC  | 23 280 |
| 1 | 23 281 | ATCGTCACAAAGGTCTTGTGCTGGTGAAGGTCAGCTGCAACCCGCGGTGCTCCTCGTTC  | 23 340 |
|   |        |                                                              |        |
| 2 | 23 281 | ATCGTCACAAAGGTCTTGTGCTGGTGAAGGTCAGCTGCAACCCGCGGTGCTCCTCGTTC  | 23 340 |

|   |        |                                                                |        |
|---|--------|----------------------------------------------------------------|--------|
| 1 | 23 341 | AGCCAGGTCTTGCATACGGCCGCCAGAGCTTCCACTTGGTCAGGCAGTAGTTTGAAGTTC   | 23 400 |
|   |        |                                                                |        |
| 2 | 23 341 | AGCCAGGTCTTGCATACGGCCGCCAGAGCTTCCACTTGGTCAGGCAGTAGTTTGAAGTTC   | 23 400 |
| 1 | 23 401 | GCCTTTAGATCGTTATCCACGTGGTACTTGTCCATCAGCGCGCGCAGCCTCCATGCCC     | 23 460 |
|   |        |                                                                |        |
| 2 | 23 401 | GCCTTTAGATCGTTATCCACGTGGTACTTGTCCATCAGCGCGCGCAGCCTCCATGCCC     | 23 460 |
| 1 | 23 461 | TTCTCCCACGCAGACACGATCGGCACACTCAGCGGGTTCATCACCGTAATTTCACTTTCC   | 23 520 |
|   |        |                                                                |        |
| 2 | 23 461 | TTCTCCCACGCAGACACGATCGGCACACTCAGCGGGTTCATCACCGTAATTTCACTTTCC   | 23 520 |
| 1 | 23 521 | GCTTCGCTGGGCTCTTCCTCTTCCTCTTGCGTCCGCATACCACGCGCCACTGGGTCTGTCT  | 23 580 |
|   |        |                                                                |        |
| 2 | 23 521 | GCTTCGCTGGGCTCTTCCTCTTCCTCTTGCGTCCGCATACCACGCGCCACTGGGTCTGTCT  | 23 580 |
| 1 | 23 581 | TCATTCAGCCGCCGCACTGTGCGCTTACCTCCTTTGCCATGCTTGATTAGCACCGGTGGG   | 23 640 |
|   |        |                                                                |        |
| 2 | 23 581 | TCATTCAGCCGCCGCACTGTGCGCTTACCTCCTTTGCCATGCTTGATTAGCACCGGTGGG   | 23 640 |
| 1 | 23 641 | TTGCTGAAACCCACCATTTGTAGCGCCACATCTTCTCTTTCTTCCTCGCTGTCCACGATT   | 23 700 |
|   |        |                                                                |        |
| 2 | 23 641 | TTGCTGAAACCCACCATTTGTAGCGCCACATCTTCTCTTTCTTCCTCGCTGTCCACGATT   | 23 700 |
| 1 | 23 701 | ACCTCTGGTGATGGCGGGCGCTCGGGCTTGGGAGAAGGGCGCTTCTTTTTCTTCTTGGGC   | 23 760 |
|   |        |                                                                |        |
| 2 | 23 701 | ACCTCTGGTGATGGCGGGCGCTCGGGCTTGGGAGAAGGGCGCTTCTTTTTCTTCTTGGGC   | 23 760 |
| 1 | 23 761 | GCAATGGCCAAATCCGCCGCCGAGGTTCGATGGCCGCGGGCTGGGTGTGCGCGGCACCAGC  | 23 820 |
|   |        |                                                                |        |
| 2 | 23 761 | GCAATGGCCAAATCCGCCGCCGAGGTTCGATGGCCGCGGGCTGGGTGTGCGCGGCACCAGC  | 23 820 |
| 1 | 23 821 | GCGTCTTGTGATGAGTCTTCCTCGTCTCCTCGGACTCGATACGCCGCCTCATCCGCTTTTTT | 23 880 |
|   |        |                                                                |        |
| 2 | 23 821 | GCGTCTTGTGATGAGTCTTCCTCGTCTCCTCGGACTCGATACGCCGCCTCATCCGCTTTTTT | 23 880 |
| 1 | 23 881 | GGGGGCGCCCGGGGAGGCGGCGGCGACGGGGACGGGGACGACACGTCCTCCATGGTTGGG   | 23 940 |
|   |        |                                                                |        |
| 2 | 23 881 | GGGGGCGCCCGGGGAGGCGGCGGCGACGGGGACGGGGACGACACGTCCTCCATGGTTGGG   | 23 940 |



|   |        |                                                                |        |
|---|--------|----------------------------------------------------------------|--------|
| 1 | 23 941 | GGACGTCGCGCCGCGCACCGCGTCCGCGCTCGGGGGTGGTTTCGCGCTGCTCCTCTTCCCGA | 24 000 |
|   |        |                                                                |        |
| 2 | 23 941 | GGACGTCGCGCCGCGCACCGCGTCCGCGCTCGGGGGTGGTTTCGCGCTGCTCCTCTTCCCGA | 24 000 |
|   |        |                                                                |        |
| 1 | 24 001 | CTGGCCATTTCTTCTCCTATAGGCAGAAAAAGATCATGGAGTCAGTCGAGAAGAAGGAC    | 24 060 |
|   |        |                                                                |        |
| 2 | 24 001 | CTGGCCATTTCTTCTCCTATAGGCAGAAAAAGATCATGGAGTCAGTCGAGAAGAAGGAC    | 24 060 |
|   |        |                                                                |        |
| 1 | 24 061 | AGCCTAACCGCCCCCTCTGAGTTCGCCACCACCGCCTCCACCGATGCCGCCAACGCGCCT   | 24 120 |
|   |        |                                                                |        |
| 2 | 24 061 | AGCCTAACCGCCCCCTCTGAGTTCGCCACCACCGCCTCCACCGATGCCGCCAACGCGCCT   | 24 120 |
|   |        |                                                                |        |
| 1 | 24 121 | ACCACCTTCCCCGTGCGAGGCACCCCCGCTTGAGGAGGAGGAAGTGATTATCGAGCAGGAC  | 24 180 |
|   |        |                                                                |        |
| 2 | 24 121 | ACCACCTTCCCCGTGCGAGGCACCCCCGCTTGAGGAGGAGGAAGTGATTATCGAGCAGGAC  | 24 180 |
|   |        |                                                                |        |
| 1 | 24 181 | CCAGGTTTTGTAAGCGAAGACGACGAGGACCGCTCAGTACCAACAGAGGATAAAAAGCAA   | 24 240 |
|   |        |                                                                |        |
| 2 | 24 181 | CCAGGTTTTGTAAGCGAAGACGACGAGGACCGCTCAGTACCAACAGAGGATAAAAAGCAA   | 24 240 |
|   |        |                                                                |        |
| 1 | 24 241 | GACCAGGACAACGCAGAGGCCAAACGAGGAACAAGTCGGGCGGGGGGACGAAAGGCATGGC  | 24 300 |
|   |        |                                                                |        |
| 2 | 24 241 | GACCAGGACAACGCAGAGGCCAAACGAGGAACAAGTCGGGCGGGGGGACGAAAGGCATGGC  | 24 300 |
|   |        |                                                                |        |
| 1 | 24 301 | GACTACCTAGATGTGGGAGACGACGTGCTGTTGAAGCATCTGCAGCGCCAGTGCGCCATT   | 24 360 |
|   |        |                                                                |        |
| 2 | 24 301 | GACTACCTAGATGTGGGAGACGACGTGCTGTTGAAGCATCTGCAGCGCCAGTGCGCCATT   | 24 360 |
|   |        |                                                                |        |
| 1 | 24 361 | ATCTGCGACGCGTTGCAAGAGCGCAGCGATGTGCCCTCGCCATAGCGGATGTCAGCCTT    | 24 420 |
|   |        |                                                                |        |
| 2 | 24 361 | ATCTGCGACGCGTTGCAAGAGCGCAGCGATGTGCCCTCGCCATAGCGGATGTCAGCCTT    | 24 420 |
|   |        |                                                                |        |
| 1 | 24 421 | GCCTACGAACGCCACCTATTCTCACCGCGCGTACCCCCAAACGCCAAGAAAACGGCACA    | 24 480 |
|   |        |                                                                |        |
| 2 | 24 421 | GCCTACGAACGCCACCTATTCTCACCGCGCGTACCCCCAAACGCCAAGAAAACGGCACA    | 24 480 |
|   |        |                                                                |        |
| 1 | 24 481 | TGCGAGCCCAACCCGCGCCTCAACTTCTACCCCGTATTTGCCGTGCCAGAGGTGCTTGCC   | 24 540 |
|   |        |                                                                |        |
| 2 | 24 481 | TGCGAGCCCAACCCGCGCCTCAACTTCTACCCCGTATTTGCCGTGCCAGAGGTGCTTGCC   | 24 540 |

|   |        |                                                                |        |
|---|--------|----------------------------------------------------------------|--------|
| 1 | 24 541 | ACCTATCACATCTTTTTCCAAAACCTGCAAGATACCCCTATCCTGCCGTGCCAACC GCAGC | 24 600 |
|   |        |                                                                |        |
| 2 | 24 541 | ACCTATCACATCTTTTTCCAAAACCTGCAAGATACCCCTATCCTGCCGTGCCAACC GCAGC | 24 600 |
| 1 | 24 601 | CGAGCGGACAAGCAGCTGGCCTTGCGGCAGGGCGCTGTCATACCTGATATCGCCTCGCTC   | 24 660 |
|   |        |                                                                |        |
| 2 | 24 601 | CGAGCGGACAAGCAGCTGGCCTTGCGGCAGGGCGCTGTCATACCTGATATCGCCTCGCTC   | 24 660 |
| 1 | 24 661 | AACGAAGTGCCAAAATCTTTGAGGGTCTTGGACGCGACGAGAAGCGCGGGCAAACGCT     | 24 720 |
|   |        |                                                                |        |
| 2 | 24 661 | AACGAAGTGCCAAAATCTTTGAGGGTCTTGGACGCGACGAGAAGCGCGGGCAAACGCT     | 24 720 |
| 1 | 24 721 | CTGCAACAGGAAAACAGCGAAAATGAAAGTCACTCTGGAGTGTTGGTGGAACTCGAGGGT   | 24 780 |
|   |        |                                                                |        |
| 2 | 24 721 | CTGCAACAGGAAAACAGCGAAAATGAAAGTCACTCTGGAGTGTTGGTGGAACTCGAGGGT   | 24 780 |
| 1 | 24 781 | GACAACGCGCGCCTAGCCGTACTAAAACGCAGCATCGAGGTCACCCACTTTGCCTACCCG   | 24 840 |
|   |        |                                                                |        |
| 2 | 24 781 | GACAACGCGCGCCTAGCCGTACTAAAACGCAGCATCGAGGTCACCCACTTTGCCTACCCG   | 24 840 |
| 1 | 24 841 | GCACTTAACCTACCCCCAAGGTCATGAGCACAGTCATGAGTGAGCTGATCGTGCGCCGT    | 24 900 |
|   |        |                                                                |        |
| 2 | 24 841 | GCACTTAACCTACCCCCAAGGTCATGAGCACAGTCATGAGTGAGCTGATCGTGCGCCGT    | 24 900 |
| 1 | 24 901 | GCGCAGCCCCTGGAGAGGGATGCAAATTTGCAAGAACAACAGAGGAGGGCCTACCCGCA    | 24 960 |
|   |        |                                                                |        |
| 2 | 24 901 | GCGCAGCCCCTGGAGAGGGATGCAAATTTGCAAGAACAACAGAGGAGGGCCTACCCGCA    | 24 960 |
| 1 | 24 961 | GTTGGCGACGAGCAGCTAGCGCGCTGGCTTCAAACGCGCGAGCCTGCCGACTTGGAGGAG   | 25 020 |
|   |        |                                                                |        |
| 2 | 24 961 | GTTGGCGACGAGCAGCTAGCGCGCTGGCTTCAAACGCGCGAGCCTGCCGACTTGGAGGAG   | 25 020 |
| 1 | 25 021 | CGACGCAAACCTAATGATGGCCGCAGTGCTCGTTACCGTGGAGCTTGAAGTGCATGCAGCGG | 25 080 |
|   |        |                                                                |        |
| 2 | 25 021 | CGACGCAAACCTAATGATGGCCGCAGTGCTCGTTACCGTGGAGCTTGAAGTGCATGCAGCGG | 25 080 |
| 1 | 25 081 | TTCTTTGCTGACCCGGAGATGCAGCGCAAGCTAGAGGAAACATTGCACTACACCTTTTTCGA | 25 140 |
|   |        |                                                                |        |
| 2 | 25 081 | TTCTTTGCTGACCCGGAGATGCAGCGCAAGCTAGAGGAAACATTGCACTACACCTTTTTCGA | 25 140 |

|   |        |                                                              |        |
|---|--------|--------------------------------------------------------------|--------|
| 1 | 25 141 | CAGGGCTACGTACGCCAGGCCTGCAAGATCTCCAACGTGGAGCTCTGCAACCTGGTCTCC | 25 200 |
|   |        |                                                              |        |
| 2 | 25 141 | CAGGGCTACGTACGCCAGGCCTGCAAGATCTCCAACGTGGAGCTCTGCAACCTGGTCTCC | 25 200 |
| 1 | 25 201 | TACCTTGAATTTTGCACGAAAACCGCCTTGGGCAAACGTGCTTCATTCCACGCTCAAG   | 25 260 |
|   |        |                                                              |        |
| 2 | 25 201 | TACCTTGAATTTTGCACGAAAACCGCCTTGGGCAAACGTGCTTCATTCCACGCTCAAG   | 25 260 |
| 1 | 25 261 | GGCGAGGCGCGCCGCGACTACGTCCGCGACTGCGTTTACTTATTTCTATGCTACACCTGG | 25 320 |
|   |        |                                                              |        |
| 2 | 25 261 | GGCGAGGCGCGCCGCGACTACGTCCGCGACTGCGTTTACTTATTTCTATGCTACACCTGG | 25 320 |
| 1 | 25 321 | CAGACGGCCATGGGCGTTTGGCAGCAGTGCTTGGAGGAGTGCAACCTCAAGGAGCTGCAG | 25 380 |
|   |        |                                                              |        |
| 2 | 25 321 | CAGACGGCCATGGGCGTTTGGCAGCAGTGCTTGGAGGAGTGCAACCTCAAGGAGCTGCAG | 25 380 |
| 1 | 25 381 | AAACTGCTAAAGCAAACTTGAAGGACCTATGGACGGCCTTCAACGAGCGCTCCGTGGCC  | 25 440 |
|   |        |                                                              |        |
| 2 | 25 381 | AAACTGCTAAAGCAAACTTGAAGGACCTATGGACGGCCTTCAACGAGCGCTCCGTGGCC  | 25 440 |
| 1 | 25 441 | GCGCACCTGGCGGACATCATTTTCCCCGAACGCCTGCTTAAAACCTGCAACAGGGTCTG  | 25 500 |
|   |        |                                                              |        |
| 2 | 25 441 | GCGCACCTGGCGGACATCATTTTCCCCGAACGCCTGCTTAAAACCTGCAACAGGGTCTG  | 25 500 |
| 1 | 25 501 | CCAGACTTCACCAGTCAAAGCATGTTGCAGAACTTTAGGAACTTTATCCTAGAGCGCTCA | 25 560 |
|   |        |                                                              |        |
| 2 | 25 501 | CCAGACTTCACCAGTCAAAGCATGTTGCAGAACTTTAGGAACTTTATCCTAGAGCGCTCA | 25 560 |
| 1 | 25 561 | GGAATCTTGCCCGCCACCTGCTGTGCACTTCTAGCGACTTTGTGCCATTAAGTACCGC   | 25 620 |
|   |        |                                                              |        |
| 2 | 25 561 | GGAATCTTGCCCGCCACCTGCTGTGCACTTCTAGCGACTTTGTGCCATTAAGTACCGC   | 25 620 |
| 1 | 25 621 | GAATGCCCTCCGCGCTTTGGGGCCACTGCTACCTTCTGCAGCTAGCCAACCTACCTTGCC | 25 680 |
|   |        |                                                              |        |
| 2 | 25 621 | GAATGCCCTCCGCGCTTTGGGGCCACTGCTACCTTCTGCAGCTAGCCAACCTACCTTGCC | 25 680 |
| 1 | 25 681 | TACCACTCTGACATAATGGAAGACGTGAGCGGTGACGGTCTACTGGAGTGCTACTGTCGC | 25 740 |
|   |        |                                                              |        |
| 2 | 25 681 | TACCACTCTGACATAATGGAAGACGTGAGCGGTGACGGTCTACTGGAGTGCTACTGTCGC | 25 740 |

|   |        |                                                               |        |
|---|--------|---------------------------------------------------------------|--------|
| 1 | 25 741 | TGCAACCTATGCACCCCGCACCGCTCCCTGGTTTGC AATTCGCAGCTGCTTAACGAAAGT | 25 800 |
|   |        |                                                               |        |
| 2 | 25 741 | TGCAACCTATGCACCCCGCACCGCTCCCTGGTTTGC AATTCGCAGCTGCTTAACGAAAGT | 25 800 |
|   |        |                                                               |        |
| 1 | 25 801 | CAAATTATCGGTACCTTTGAGCTGCAGGGTCCCTCGCCTGACGAAAAGTCCGCGGCTCCG  | 25 860 |
|   |        |                                                               |        |
| 2 | 25 801 | CAAATTATCGGTACCTTTGAGCTGCAGGGTCCCTCGCCTGACGAAAAGTCCGCGGCTCCG  | 25 860 |
|   |        |                                                               |        |
| 1 | 25 861 | GGGTTGAAACTCACTCCGGGGCTGTGGACGTCCGCTTACCTTCGCAAATTTGTACCTGAG  | 25 920 |
|   |        |                                                               |        |
| 2 | 25 861 | GGGTTGAAACTCACTCCGGGGCTGTGGACGTCCGCTTACCTTCGCAAATTTGTACCTGAG  | 25 920 |
|   |        |                                                               |        |
| 1 | 25 921 | GACTACCACGCCACGAGATTAGGTTCTACGAAGACCAATCCCGCCGCCTAATGCGGAG    | 25 980 |
|   |        |                                                               |        |
| 2 | 25 921 | GACTACCACGCCACGAGATTAGGTTCTACGAAGACCAATCCCGCCGCCTAATGCGGAG    | 25 980 |
|   |        |                                                               |        |
| 1 | 25 981 | CTTACCGCCTGCGTCATTACCCAGGGCCACATTCTTGGCCAATTGCAAGCCATCAACAAA  | 26 040 |
|   |        |                                                               |        |
| 2 | 25 981 | CTTACCGCCTGCGTCATTACCCAGGGCCACATTCTTGGCCAATTGCAAGCCATCAACAAA  | 26 040 |
|   |        |                                                               |        |
| 1 | 26 041 | GCCCGCCAAGAGTTTCTGCTACGAAAGGGACGGGGGTTTACTTTGGACCCCCAGTCCGGC  | 26 100 |
|   |        |                                                               |        |
| 2 | 26 041 | GCCCGCCAAGAGTTTCTGCTACGAAAGGGACGGGGGTTTACTTTGGACCCCCAGTCCGGC  | 26 100 |
|   |        |                                                               |        |
| 1 | 26 101 | GAGGAGCTCAACCCAATCCCCCGCCGCGCAGCCCTATCAGCAGCAGCCGCGGGCCCTT    | 26 160 |
|   |        |                                                               |        |
| 2 | 26 101 | GAGGAGCTCAACCCAATCCCCCGCCGCGCAGCCCTATCAGCAGCAGCCGCGGGCCCTT    | 26 160 |
|   |        |                                                               |        |
| 1 | 26 161 | GCTTCCCAGGATGGCACCCAAAAAGAAGCTGCAGCTGCCGCGCCACCCACGGACGAGGA   | 26 220 |
|   |        |                                                               |        |
| 2 | 26 161 | GCTTCCCAGGATGGCACCCAAAAAGAAGCTGCAGCTGCCGCGCCACCCACGGACGAGGA   | 26 220 |
|   |        |                                                               |        |
| 1 | 26 221 | GGAATACTGGGACAGTCAGGCAGAGGAGTTTTGGACGAGGAGGAGGAGGACATGATGGA   | 26 280 |
|   |        |                                                               |        |
| 2 | 26 221 | GGAATACTGGGACAGTCAGGCAGAGGAGTTTTGGACGAGGAGGAGGAGGACATGATGGA   | 26 280 |
|   |        |                                                               |        |
| 1 | 26 281 | AGACTGGGAGAGCCTAGACGAGGAAGCTTCCGAGGTCGAAGAGGTGTCAGACGAAACACC  | 26 340 |
|   |        |                                                               |        |
| 2 | 26 281 | AGACTGGGAGAGCCTAGACGAGGAAGCTTCCGAGGTCGAAGAGGTGTCAGACGAAACACC  | 26 340 |

|   |        |                                                              |        |
|---|--------|--------------------------------------------------------------|--------|
| 1 | 26 341 | GTCACCCTCGGTCGCATTCCCCTCGCCGGCGCCCCAGAAATCGGCAACCGGTTCCAGCAT | 26 400 |
|   |        |                                                              |        |
| 2 | 26 341 | GTCACCCTCGGTCGCATTCCCCTCGCCGGCGCCCCAGAAATCGGCAACCGGTTCCAGCAT | 26 400 |
| 1 | 26 401 | GGCTACAACCTCCGCTCCTCAGGCGCCGCGGCACTGCCCGTTGCGCGACCCAACCGTAG  | 26 460 |
|   |        |                                                              |        |
| 2 | 26 401 | GGCTACAACCTCCGCTCCTCAGGCGCCGCGGCACTGCCCGTTGCGCGACCCAACCGTAG  | 26 460 |
| 1 | 26 461 | ATGGGACACCACTGGAACCAGGGCCGGTAAGTCCAAGCAGCCGCGCCGTTAGCCCAAGA  | 26 520 |
|   |        |                                                              |        |
| 2 | 26 461 | ATGGGACACCACTGGAACCAGGGCCGGTAAGTCCAAGCAGCCGCGCCGTTAGCCCAAGA  | 26 520 |
| 1 | 26 521 | GCAACAACAGCGCCAAGGCTACCGCTCATGGCGCGGGCACAGAAGGCCATAGTTGCTTG  | 26 580 |
|   |        |                                                              |        |
| 2 | 26 521 | GCAACAACAGCGCCAAGGCTACCGCTCATGGCGCGGGCACAGAAGGCCATAGTTGCTTG  | 26 580 |
| 1 | 26 581 | CTTGCAAGACTGTGGGGGCAACATCTCCTTCGCCCGCCGCTTTCTTCTCTACCATCACGG | 26 640 |
|   |        |                                                              |        |
| 2 | 26 581 | CTTGCAAGACTGTGGGGGCAACATCTCCTTCGCCCGCCGCTTTCTTCTCTACCATCACGG | 26 640 |
| 1 | 26 641 | CGTGGCCTTCCCCGTAACATCCTGCATTACTACCGTCATCTCTACAGCCATACTGCAC   | 26 700 |
|   |        |                                                              |        |
| 2 | 26 641 | CGTGGCCTTCCCCGTAACATCCTGCATTACTACCGTCATCTCTACAGCCATACTGCAC   | 26 700 |
| 1 | 26 701 | CGGCGGCAGCGGCAGCAACAGCAGCGGCCACACAGAAGCAAAGGCGACCGGATAGCAAGA | 26 760 |
|   |        |                                                              |        |
| 2 | 26 701 | CGGCGGCAGCGGCAGCAACAGCAGCGGCCACACAGAAGCAAAGGCGACCGGATAGCAAGA | 26 760 |
| 1 | 26 761 | CTCTGACAAAGCCCAAGAAATCCACAGCGGCGGCAGCAGCAGGAGGAGGAGCGCTGCGTC | 26 820 |
|   |        |                                                              |        |
| 2 | 26 761 | CTCTGACAAAGCCCAAGAAATCCACAGCGGCGGCAGCAGCAGGAGGAGGAGCGCTGCGTC | 26 820 |
| 1 | 26 821 | TGGCGCCCAACGAACCCGTATCGACCCGCGAGCTTAGAAACAGGATTTTTCCCACTCTGT | 26 880 |
|   |        |                                                              |        |
| 2 | 26 821 | TGGCGCCCAACGAACCCGTATCGACCCGCGAGCTTAGAAACAGGATTTTTCCCACTCTGT | 26 880 |
| 1 | 26 881 | ATGCTATATTTCAACAGAGCAGGGGCCAAGAACAAGAGCTGAAAATAAAAAACAGGTCTC | 26 940 |
|   |        |                                                              |        |
| 2 | 26 881 | ATGCTATATTTCAACAGAGCAGGGGCCAAGAACAAGAGCTGAAAATAAAAAACAGGTCTC | 26 940 |

|   |        |                                                                |        |
|---|--------|----------------------------------------------------------------|--------|
| 1 | 26 941 | TGCGATCCCTCACCCGCAGCTGCCTGTATCACAAAAGCGAAGATCAGCTTCGGCGCACGC   | 27 000 |
|   |        |                                                                |        |
| 2 | 26 941 | TGCGATCCCTCACCCGCAGCTGCCTGTATCACAAAAGCGAAGATCAGCTTCGGCGCACGC   | 27 000 |
|   |        |                                                                |        |
| 1 | 27 001 | TGGAAGACGCGGAGGCTCTCTTCAGTAAATACTGCGCGCTGACTCTTAAGGACTAGTTTC   | 27 060 |
|   |        |                                                                |        |
| 2 | 27 001 | TGGAAGACGCGGAGGCTCTCTTCAGTAAATACTGCGCGCTGACTCTTAAGGACTAGTTTC   | 27 060 |
|   |        |                                                                |        |
| 1 | 27 061 | GCGCCCTTTCTCAAATTTAAGCGCGAAAACACTACGTCATCTCCAGCGGCCACACCCGGCGC | 27 120 |
|   |        |                                                                |        |
| 2 | 27 061 | GCGCCCTTTCTCAAATTTAAGCGCGAAAACACTACGTCATCTCCAGCGGCCACACCCGGCGC | 27 120 |
|   |        |                                                                |        |
| 1 | 27 121 | CAGCACCTGTTGTCAGCGCCATTATGAGCAAGGAAATTCACGCGCCCTACATGTGGAGTT   | 27 180 |
|   |        |                                                                |        |
| 2 | 27 121 | CAGCACCTGTTGTCAGCGCCATTATGAGCAAGGAAATTCACGCGCCCTACATGTGGAGTT   | 27 180 |
|   |        |                                                                |        |
| 1 | 27 181 | ACCAGCCACAAATGGGACTTGCGGCTGGAGCTGCCAAGACTACTCAACCCGAATAAACT    | 27 240 |
|   |        |                                                                |        |
| 2 | 27 181 | ACCAGCCACAAATGGGACTTGCGGCTGGAGCTGCCAAGACTACTCAACCCGAATAAACT    | 27 240 |
|   |        |                                                                |        |
| 1 | 27 241 | ACATGAGCGCGGGACCCACATGATATCCCGGGTCAACGGAATACGCGCCCACCGAAACC    | 27 300 |
|   |        |                                                                |        |
| 2 | 27 241 | ACATGAGCGCGGGACCCACATGATATCCCGGGTCAACGGAATACGCGCCCACCGAAACC    | 27 300 |
|   |        |                                                                |        |
| 1 | 27 301 | GAATTCTCCTGGAACAGGCGGCTATTACCACCACACCTCGTAATAACCTTAATCCCGTA    | 27 360 |
|   |        |                                                                |        |
| 2 | 27 301 | GAATTCTCCTGGAACAGGCGGCTATTACCACCACACCTCGTAATAACCTTAATCCCGTA    | 27 360 |
|   |        |                                                                |        |
| 1 | 27 361 | GTTGGCCCGCTGCCCTGGTGTACCAGGAAAGTCCCGCTCCCACCACTGTGGTACTTCCCA   | 27 420 |
|   |        |                                                                |        |
| 2 | 27 361 | GTTGGCCCGCTGCCCTGGTGTACCAGGAAAGTCCCGCTCCCACCACTGTGGTACTTCCCA   | 27 420 |
|   |        |                                                                |        |
| 1 | 27 421 | GAGACGCCAGGCCGAAGTTCAGATGACTAACTCAGGGGCGCAGCTTGCGGGCGGCTTTC    | 27 480 |
|   |        |                                                                |        |
| 2 | 27 421 | GAGACGCCAGGCCGAAGTTCAGATGACTAACTCAGGGGCGCAGCTTGCGGGCGGCTTTC    | 27 480 |
|   |        |                                                                |        |
| 1 | 27 481 | GTCACAGGGTGCGGTCGCCCGGGCAGGGTATAACTCACCTGACAATCAGAGGGCGAGGTA   | 27 540 |
|   |        |                                                                |        |
| 2 | 27 481 | GTCACAGGGTGCGGTCGCCCGGGCAGGGTATAACTCACCTGACAATCAGAGGGCGAGGTA   | 27 540 |

|   |        |                                                                   |        |
|---|--------|-------------------------------------------------------------------|--------|
| 1 | 27 541 | TTCAGCTCAACGACGAGTCGGTGAGCTCCTCGCTTGGTCTCCGTCCGGACGGGACATTTCT<br> | 27 600 |
| 2 | 27 541 | TTCAGCTCAACGACGAGTCGGTGAGCTCCTCGCTTGGTCTCCGTCCGGACGGGACATTTCT<br> | 27 600 |
| 1 | 27 601 | AGATCGGCGGCGCCGGCCGCTCTTCATTCACGCCTCGTCAGGCAATCCTAACTCTGCAGA<br>  | 27 660 |
| 2 | 27 601 | AGATCGGCGGCGCCGGCCGCTCTTCATTCACGCCTCGTCAGGCAATCCTAACTCTGCAGA<br>  | 27 660 |
| 1 | 27 661 | CCTCGTCCTCTGAGCCGCGCTCTGGAGGCATTGGAACCTCTGCAATTTATTGAGGAGTTTG<br> | 27 720 |
| 2 | 27 661 | CCTCGTCCTCTGAGCCGCGCTCTGGAGGCATTGGAACCTCTGCAATTTATTGAGGAGTTTG<br> | 27 720 |
| 1 | 27 721 | TGCCATCGGTCTACTTTAACCCTTCTCGGGACCTCCCGGCCACTATCCGGATCAATTTA<br>   | 27 780 |
| 2 | 27 721 | TGCCATCGGTCTACTTTAACCCTTCTCGGGACCTCCCGGCCACTATCCGGATCAATTTA<br>   | 27 780 |
| 1 | 27 781 | TTCTAACTTTGACGCGGTAAAGGACTCGGCGGACGGCTACGACTGAATGTTAAGTGGAG<br>   | 27 840 |
| 2 | 27 781 | TTCTAACTTTGACGCGGTAAAGGACTCGGCGGACGGCTACGACTGAATGTTAAGTGGAG<br>   | 27 840 |
| 1 | 27 841 | AGGCAGAGCAACTGCGCCTGAAACACCTGGTCCACTGTGCGCCGCCACAAGTGCTTTGCC<br>  | 27 900 |
| 2 | 27 841 | AGGCAGAGCAACTGCGCCTGAAACACCTGGTCCACTGTGCGCCGCCACAAGTGCTTTGCC<br>  | 27 900 |
| 1 | 27 901 | GCGACTCCGGTGAGTTTTGCTACTTTGAATTGCCCGAGGATCATATCGAGGGCCCGGCGC<br>  | 27 960 |
| 2 | 27 901 | GCGACTCCGGTGAGTTTTGCTACTTTGAATTGCCCGAGGATCATATCGAGGGCCCGGCGC<br>  | 27 960 |
| 1 | 27 961 | ACGGCGTCCGGCTTACCGCCAGGGAGAGCTTGCCCGTAGCCTGATTCGGGAGTTTACCC<br>   | 28 020 |
| 2 | 27 961 | ACGGCGTCCGGCTTACCGCCAGGGAGAGCTTGCCCGTAGCCTGATTCGGGAGTTTACCC<br>   | 28 020 |
| 1 | 28 021 | AGCGCCCCCTGCTAGTTGAGCGGGACAGGGGACCCTGTGTTCTCACTGTGATTTGCAACT<br>  | 28 080 |
| 2 | 28 021 | AGCGCCCCCTGCTAGTTGAGCGGGACAGGGGACCCTGTGTTCTCACTGTGATTTGCAACT<br>  | 28 080 |
| 1 | 28 081 | GTCCTAACCTGGATTACATCAAGATCTTTGTTGCCATCTCTGTGCTGAGTATAATAAAT<br>   | 28 140 |
| 2 | 28 081 | GTCCTAACCTGGATTACATCAAGATCTTTGTTGCCATCTCTGTGCTGAGTATAATAAAT<br>   | 28 140 |

|   |        |                                                               |        |
|---|--------|---------------------------------------------------------------|--------|
| 1 | 28 141 | ACAGAAATTTAAAATATACTGGGGCTCCTATCGCCATCCTGTAAACGCCACCGTCTTCACC | 28 200 |
|   |        |                                                               |        |
| 2 | 28 141 | ACAGAAATTTAAAATATACTGGGGCTCCTATCGCCATCCTGTAAACGCCACCGTCTTCACC | 28 200 |
| 1 | 28 201 | CGCCCAAGCAAACCAAGGCGAACCTTACCTGGTACTTTTAAACATCTCTCCCTCTGTGATT | 28 260 |
|   |        |                                                               |        |
| 2 | 28 201 | CGCCCAAGCAAACCAAGGCGAACCTTACCTGGTACTTTTAAACATCTCTCCCTCTGTGATT | 28 260 |
| 1 | 28 261 | TACAACAGTTTCAACCCAGACGGAGTGAGTCTACGAGAGAACCTCTCCGAGCTCAGCTAC  | 28 320 |
|   |        |                                                               |        |
| 2 | 28 261 | TACAACAGTTTCAACCCAGACGGAGTGAGTCTACGAGAGAACCTCTCCGAGCTCAGCTAC  | 28 320 |
| 1 | 28 321 | TCCATCAGAAAAACACCACCTCCTTACCTGCCGGGAACGTACGAGTGCGTCACCGGCC    | 28 380 |
|   |        |                                                               |        |
| 2 | 28 321 | TCCATCAGAAAAACACCACCTCCTTACCTGCCGGGAACGTACGAGTGCGTCACCGGCC    | 28 380 |
| 1 | 28 381 | GCTGCACCACACCTACCGCCTGACCGTAAACCAGACTTTTTCCGGACAGACCTCAATAAC  | 28 440 |
|   |        |                                                               |        |
| 2 | 28 381 | GCTGCACCACACCTACCGCCTGACCGTAAACCAGACTTTTTCCGGACAGACCTCAATAAC  | 28 440 |
| 1 | 28 441 | TCTGTTTACCAGAACAGGAGGTGAGCTTAGAAAACCTTAGGGTATTAGGCCAAAGGCGC   | 28 500 |
|   |        |                                                               |        |
| 2 | 28 441 | TCTGTTTACCAGAACAGGAGGTGAGCTTAGAAAACCTTAGGGTATTAGGCCAAAGGCGC   | 28 500 |
| 1 | 28 501 | AGCTACTGTGGGGTTTACCATGGAAAGGGTCCAACCCCTGGAAGAGAATGTGGGAAATGC  | 28 560 |
|   |        |                                                               |        |
| 2 | 28 501 | AGCTACTGTGGGGTTTACCATGGAAAGGGTCCAACCCCTGGAAGAGAATGTGGGAAATGC  | 28 560 |
| 1 | 28 561 | AGCCAGGCCAAGATTCGAGAGGAACAAGCTATTGCTGGTGGCCTCTGTAATTCAGGGACT  | 28 620 |
|   |        |                                                               |        |
| 2 | 28 561 | AGCCAGGCCAAGATTCGAGAGGAACAAGCTATTGCTGGTGGCCTCTGTAATTCAGGGACT  | 28 620 |
| 1 | 28 621 | GGGGCTGCTCCTGTGCTTCACCTACATCTGCCTGCACTTCTCTGCTCTTCAGGTATCACA  | 28 680 |
|   |        |                                                               |        |
| 2 | 28 621 | GGGGCTGCTCCTGTGCTTCACCTACATCTGCCTGCACTTCTCTGCTCTTCAGGTATCACA  | 28 680 |
| 1 | 28 681 | TCGGTATCCTCGAATTCAAAGTATCAAAGTACAATTTACCGAATATAAGAAGGAGAAAGG  | 28 740 |
|   |        |                                                               |        |
| 2 | 28 681 | TCGGTATCCTCGAATTCAAAGTATCAAAGTACAATTTACCGAATATAAGAAGGAGAAAGG  | 28 740 |



|   |        |                                                               |        |
|---|--------|---------------------------------------------------------------|--------|
| 1 | 28 741 | TTTCATCCTCACTTCCCAAAGGAGGATGAAATCATGAAGGTGCAGAACAACCTCAGTCAT  | 28 800 |
|   |        |                                                               |        |
| 2 | 28 741 | TTTCATCCTCACTTCCCAAAGGAGGATGAAATCATGAAGGTGCAGAACAACCTCAGTCAT  | 28 800 |
|   |        |                                                               |        |
| 1 | 28 801 | CATCAACTGTGATGGGTTTTATCTCATCTCCCTGAAGGGCTACTTCTCCAGGAAGTCAA   | 28 860 |
|   |        |                                                               |        |
| 2 | 28 801 | CATCAACTGTGATGGGTTTTATCTCATCTCCCTGAAGGGCTACTTCTCCAGGAAGTCAA   | 28 860 |
|   |        |                                                               |        |
| 1 | 28 861 | CATTAGCCTTCATTACCAGAAGGATGAGGAGCCCCTCTTCCAACCTGAAGAAGGTCAGGTC | 28 920 |
|   |        |                                                               |        |
| 2 | 28 861 | CATTAGCCTTCATTACCAGAAGGATGAGGAGCCCCTCTTCCAACCTGAAGAAGGTCAGGTC | 28 920 |
|   |        |                                                               |        |
| 1 | 28 921 | TGTCAACTCCTTGATGGTGGCCTCTCTGACTTACAAAGACAAAGTCTACTTGAATGTGAC  | 28 980 |
|   |        |                                                               |        |
| 2 | 28 921 | TGTCAACTCCTTGATGGTGGCCTCTCTGACTTACAAAGACAAAGTCTACTTGAATGTGAC  | 28 980 |
|   |        |                                                               |        |
| 1 | 28 981 | CACTGACAATACCTCCCTGGATGACTTCCATGTGAATGGCGGAGAAGTCTACTTATCCA   | 29 040 |
|   |        |                                                               |        |
| 2 | 28 981 | CACTGACAATACCTCCCTGGATGACTTCCATGTGAATGGCGGAGAAGTCTACTTATCCA   | 29 040 |
|   |        |                                                               |        |
| 1 | 29 041 | TCAAAATCCTGGTGAATTCTGTGTCCTTAGGAAGAGGAGGAGCGGCAGCGGCGAGGCCAG  | 29 100 |
|   |        |                                                               |        |
| 2 | 29 041 | TCAAAATCCTGGTGAATTCTGTGTCCTTAGGAAGAGGAGGAGCGGCAGCGGCGAGGCCAG  | 29 100 |
|   |        |                                                               |        |
| 1 | 29 101 | GCACAAGCAGAAGATCGTGGCCCCCGTGAAGCAGACCCTGAACTTCGACCTGCTGAAGCT  | 29 160 |
|   |        |                                                               |        |
| 2 | 29 101 | GCACAAGCAGAAGATCGTGGCCCCCGTGAAGCAGACCCTGAACTTCGACCTGCTGAAGCT  | 29 160 |
|   |        |                                                               |        |
| 1 | 29 161 | GGCCGGCGACGTGGAGAGCAACCCCGGCCCATGATCGAAACATACAACCAACTTCTCC    | 29 220 |
|   |        |                                                               |        |
| 2 | 29 161 | GGCCGGCGACGTGGAGAGCAACCCCGGCCCATGATCGAAACATACAACCAACTTCTCC    | 29 220 |
|   |        |                                                               |        |
| 1 | 29 221 | CCGATCTGCGGCCACTGGACTGCCATCAGCATGAAAATTTTATGTATTTACTTACTGT    | 29 280 |
|   |        |                                                               |        |
| 2 | 29 221 | CCGATCTGCGGCCACTGGACTGCCATCAGCATGAAAATTTTATGTATTTACTTACTGT    | 29 280 |
|   |        |                                                               |        |
| 1 | 29 281 | TTTTCTTATCACCCAGATGATTGGGTCAGCACTTTTTGCTGTGTATCTTCATAGAAGGTT  | 29 340 |
|   |        |                                                               |        |
| 2 | 29 281 | TTTTCTTATCACCCAGATGATTGGGTCAGCACTTTTTGCTGTGTATCTTCATAGAAGGTT  | 29 340 |

|   |        |                                                               |        |
|---|--------|---------------------------------------------------------------|--------|
| 1 | 29 341 | GGACAAGATAGAAGATGAAAGGAATCTTCATGAAGATTTTGTATTTCATGAAAACGATACA | 29 400 |
|   |        |                                                               |        |
| 2 | 29 341 | GGACAAGATAGAAGATGAAAGGAATCTTCATGAAGATTTTGTATTTCATGAAAACGATACA | 29 400 |
| 1 | 29 401 | GAGATGCAACACAGGAGAAAGATCCTTATCCTTACTGAACTGTGAGGAGATTAAGCCAA   | 29 460 |
|   |        |                                                               |        |
| 2 | 29 401 | GAGATGCAACACAGGAGAAAGATCCTTATCCTTACTGAACTGTGAGGAGATTAAGCCAA   | 29 460 |
| 1 | 29 461 | GTTTGAAGGCTTTGTGAAGGATATAATGTTAAACAAAGAGGAGACGAAGAAAGAAAACAG  | 29 520 |
|   |        |                                                               |        |
| 2 | 29 461 | GTTTGAAGGCTTTGTGAAGGATATAATGTTAAACAAAGAGGAGACGAAGAAAGAAAACAG  | 29 520 |
| 1 | 29 521 | CTTTGAAATGCAAAAAGGTGATCAGAATCCTCAAATTGCGGCACATGTCATAAGTGAGGC  | 29 580 |
|   |        |                                                               |        |
| 2 | 29 521 | CTTTGAAATGCAAAAAGGTGATCAGAATCCTCAAATTGCGGCACATGTCATAAGTGAGGC  | 29 580 |
| 1 | 29 581 | CAGCAGTAAAACAACATCTGTGTTACAGTGGGCTGAAAAGGATACTACACCATGAGCAA   | 29 640 |
|   |        |                                                               |        |
| 2 | 29 581 | CAGCAGTAAAACAACATCTGTGTTACAGTGGGCTGAAAAGGATACTACACCATGAGCAA   | 29 640 |
| 1 | 29 641 | CAACTTGGTAACCCTGGAAAATGGGAAACAGCTGACCGTTAAAAGACAAGGACTCTATTA  | 29 700 |
|   |        |                                                               |        |
| 2 | 29 641 | CAACTTGGTAACCCTGGAAAATGGGAAACAGCTGACCGTTAAAAGACAAGGACTCTATTA  | 29 700 |
| 1 | 29 701 | TATCTATGCCCAAGTCACCTTCTGTTCCAATCGGGAAGCTTCGAGTCAAGCTCCATTTAT  | 29 760 |
|   |        |                                                               |        |
| 2 | 29 701 | TATCTATGCCCAAGTCACCTTCTGTTCCAATCGGGAAGCTTCGAGTCAAGCTCCATTTAT  | 29 760 |
| 1 | 29 761 | AGCCAGCCTCTGCCTAAAGTCCCCGGTAGATTTCGAGAGAATCTTACTCAGAGCTGCAAA  | 29 820 |
|   |        |                                                               |        |
| 2 | 29 761 | AGCCAGCCTCTGCCTAAAGTCCCCGGTAGATTTCGAGAGAATCTTACTCAGAGCTGCAAA  | 29 820 |
| 1 | 29 821 | TACCCACAGTTCCGCCAAACCTTGCGGGCAACAATCCATTCACCTGGGAGGAGTATTTGA  | 29 880 |
|   |        |                                                               |        |
| 2 | 29 821 | TACCCACAGTTCCGCCAAACCTTGCGGGCAACAATCCATTCACCTGGGAGGAGTATTTGA  | 29 880 |
| 1 | 29 881 | ATTGCAACCAGGTGCTTCGGTGTTTGTCAATGTGACTGATCCAAGCCAAGTGAGCCATGG  | 29 940 |
|   |        |                                                               |        |
| 2 | 29 881 | ATTGCAACCAGGTGCTTCGGTGTTTGTCAATGTGACTGATCCAAGCCAAGTGAGCCATGG  | 29 940 |

|   |        |                                                               |        |
|---|--------|---------------------------------------------------------------|--------|
| 1 | 29 941 | CACTGGCTTCACGTCCTTTGGCTTACTCAAACCTCTGATAATTTACTAAGTTACAAAGCTA | 30 000 |
|   |        |                                                               |        |
| 2 | 29 941 | CACTGGCTTCACGTCCTTTGGCTTACTCAAACCTCTGATAATTTACTAAGTTACAAAGCTA | 30 000 |
|   |        |                                                               |        |
| 1 | 30 001 | ATGTCACCACTAACTGCTTTACTCGCTGCTTGCAAAACAAATTCAAAAAGTTAGCATTAT  | 30 060 |
|   |        |                                                               |        |
| 2 | 30 001 | ATGTCACCACTAACTGCTTTACTCGCTGCTTGCAAAACAAATTCAAAAAGTTAGCATTAT  | 30 060 |
|   |        |                                                               |        |
| 1 | 30 061 | AATTAGAATAGGATTTAAACCCCCGGTCATTTCTGCTCAATACCATTCCCCTGAACAA    | 30 120 |
|   |        |                                                               |        |
| 2 | 30 061 | AATTAGAATAGGATTTAAACCCCCGGTCATTTCTGCTCAATACCATTCCCCTGAACAA    | 30 120 |
|   |        |                                                               |        |
| 1 | 30 121 | TTGACTCTATGTGGGATATGCTCCAGCGCTACAACCTTGAAGTCAGGCTTCTGGATGTC   | 30 180 |
|   |        |                                                               |        |
| 2 | 30 121 | TTGACTCTATGTGGGATATGCTCCAGCGCTACAACCTTGAAGTCAGGCTTCTGGATGTC   | 30 180 |
|   |        |                                                               |        |
| 1 | 30 181 | AGCATCTGACTTTGGCCAGCACCTGTCCCGCGGATTTGTTCCAGTCCAACCTACAGCGACC | 30 240 |
|   |        |                                                               |        |
| 2 | 30 181 | AGCATCTGACTTTGGCCAGCACCTGTCCCGCGGATTTGTTCCAGTCCAACCTACAGCGACC | 30 240 |
|   |        |                                                               |        |
| 1 | 30 241 | CACCCTAACAGAGATGACCAACACAACCAACGCGGCCGCGCTACCGGACTTACATCTAC   | 30 300 |
|   |        |                                                               |        |
| 2 | 30 241 | CACCCTAACAGAGATGACCAACACAACCAACGCGGCCGCGCTACCGGACTTACATCTAC   | 30 300 |
|   |        |                                                               |        |
| 1 | 30 301 | CACAAATACACCCCAAGTTTCTGCCTTTGTCAATAACTGGGATAACTTGGGCATGTGGTG  | 30 360 |
|   |        |                                                               |        |
| 2 | 30 301 | CACAAATACACCCCAAGTTTCTGCCTTTGTCAATAACTGGGATAACTTGGGCATGTGGTG  | 30 360 |
|   |        |                                                               |        |
| 1 | 30 361 | GTTCTCCATAGCGCTTATGTTTGTATGCCTTATTATTATGTGGCTCATCTGCTGCCTAAA  | 30 420 |
|   |        |                                                               |        |
| 2 | 30 361 | GTTCTCCATAGCGCTTATGTTTGTATGCCTTATTATTATGTGGCTCATCTGCTGCCTAAA  | 30 420 |
|   |        |                                                               |        |
| 1 | 30 421 | GCGCAAACGCGCCCGACCACCCATCTATAGTCCCATCATTGTGCTACACCCAAACAATGA  | 30 480 |
|   |        |                                                               |        |
| 2 | 30 421 | GCGCAAACGCGCCCGACCACCCATCTATAGTCCCATCATTGTGCTACACCCAAACAATGA  | 30 480 |
|   |        |                                                               |        |
| 1 | 30 481 | TGGAATCCATAGATTGGACGGACTGAAACACATGTTCTTTTCTCTTACAGTATGATTAAA  | 30 540 |
|   |        |                                                               |        |
| 2 | 30 481 | TGGAATCCATAGATTGGACGGACTGAAACACATGTTCTTTTCTCTTACAGTATGATTAAA  | 30 540 |

|   |        |                                                              |        |
|---|--------|--------------------------------------------------------------|--------|
| 1 | 30 541 | TGAGACATGATTCCTCGAGTTTTTATATTACTGACCCTTGTTGCGCTTTTTTGTGCGTGC | 30 600 |
|   |        |                                                              |        |
| 2 | 30 541 | TGAGACATGATTCCTCGAGTTTTTATATTACTGACCCTTGTTGCGCTTTTTTGTGCGTGC | 30 600 |
| 1 | 30 601 | TCCACATTGGCTGCGGTTTCTCACATCGAAGTAGACTGCATTCCAGCCTTCACAGTCTAT | 30 660 |
|   |        |                                                              |        |
| 2 | 30 601 | TCCACATTGGCTGCGGTTTCTCACATCGAAGTAGACTGCATTCCAGCCTTCACAGTCTAT | 30 660 |
| 1 | 30 661 | TTGCTTTACGGATTTGTCACCCTCACGCTCATCTGCAGCCTCATCACTGTGGTCATCGCC | 30 720 |
|   |        |                                                              |        |
| 2 | 30 661 | TTGCTTTACGGATTTGTCACCCTCACGCTCATCTGCAGCCTCATCACTGTGGTCATCGCC | 30 720 |
| 1 | 30 721 | TTTATCCAGTGCATTGACTGGGTCTGTGTGCGCTTTGCATATCTCAGACACCATCCCCAG | 30 780 |
|   |        |                                                              |        |
| 2 | 30 721 | TTTATCCAGTGCATTGACTGGGTCTGTGTGCGCTTTGCATATCTCAGACACCATCCCCAG | 30 780 |
| 1 | 30 781 | TACAGGGACAGGACTATAGCTGAGCTTCTTAGAATTCTTTAATTATGAAATTTACTGTGA | 30 840 |
|   |        |                                                              |        |
| 2 | 30 781 | TACAGGGACAGGACTATAGCTGAGCTTCTTAGAATTCTTTAATTATGAAATTTACTGTGA | 30 840 |
| 1 | 30 841 | CTTTTCTGCTGATTATTTGCACCCTATCTGCGTTTTGTTCCCCGACCTCCAAGCCTCAAA | 30 900 |
|   |        |                                                              |        |
| 2 | 30 841 | CTTTTCTGCTGATTATTTGCACCCTATCTGCGTTTTGTTCCCCGACCTCCAAGCCTCAAA | 30 900 |
| 1 | 30 901 | GACATATATCATGCAGATTCACCTCGTATATGGAATATTCCAAGTTGCTACAATGAAAAA | 30 960 |
|   |        |                                                              |        |
| 2 | 30 901 | GACATATATCATGCAGATTCACCTCGTATATGGAATATTCCAAGTTGCTACAATGAAAAA | 30 960 |
| 1 | 30 961 | GCGATCTTTCCGAAGCCTGGTTATATGCAATCATCTCTGTTATGGTGTCTGCAGTACCA  | 31 020 |
|   |        |                                                              |        |
| 2 | 30 961 | GCGATCTTTCCGAAGCCTGGTTATATGCAATCATCTCTGTTATGGTGTCTGCAGTACCA  | 31 020 |
| 1 | 31 021 | TCTTAGCCCTAGCTATATATCCCTACCTTGACATTGGCTGGAACGCAATAGATGCCATGA | 31 080 |
|   |        |                                                              |        |
| 2 | 31 021 | TCTTAGCCCTAGCTATATATCCCTACCTTGACATTGGCTGGAACGCAATAGATGCCATGA | 31 080 |
| 1 | 31 081 | ACCACCCAACCTTTCCCCGCGCCGCTATGCTTCCACTGCAACAAGTTGTTGCCGGCGGCT | 31 140 |
|   |        |                                                              |        |
| 2 | 31 081 | ACCACCCAACCTTTCCCCGCGCCGCTATGCTTCCACTGCAACAAGTTGTTGCCGGCGGCT | 31 140 |

|   |        |                                                               |        |
|---|--------|---------------------------------------------------------------|--------|
| 1 | 31 141 | TTGTCCCAGCCAATCAGCCTCGGCCACCTTCTCCCACCCCACTGAAATCAGCTACTTTA   | 31 200 |
|   |        |                                                               |        |
| 2 | 31 141 | TTGTCCCAGCCAATCAGCCTCGGCCACCTTCTCCCACCCCACTGAAATCAGCTACTTTA   | 31 200 |
| 1 | 31 201 | ATCTAACAGGAGGAGACGACTGATAAAAAAAAAATAATAAAGCATCACTTACTTAAAATCA | 31 260 |
|   |        |                                                               |        |
| 2 | 31 201 | ATCTAACAGGAGGAGACGACTGATAAAAAAAAAATAATAAAGCATCACTTACTTAAAATCA | 31 260 |
| 1 | 31 261 | GTTAGCAAATTTCTGTCCAGTTTATTCAGCAGCACCTCCTTGCCCTCCTCCCAGCTCTGG  | 31 320 |
|   |        |                                                               |        |
| 2 | 31 261 | GTTAGCAAATTTCTGTCCAGTTTATTCAGCAGCACCTCCTTGCCCTCCTCCCAGCTCTGG  | 31 320 |
| 1 | 31 321 | TATTGCAGCTTCCTCCTGGCTGCAAACCTTCTCCACAATCTAAATGGAATGTCAGTTTCC  | 31 380 |
|   |        |                                                               |        |
| 2 | 31 321 | TATTGCAGCTTCCTCCTGGCTGCAAACCTTCTCCACAATCTAAATGGAATGTCAGTTTCC  | 31 380 |
| 1 | 31 381 | TCCTGTTCTGTCCATCCGCACCCACTATCTTCATGTTGTTGCAGATGAAGCGCGCAAGA   | 31 440 |
|   |        |                                                               |        |
| 2 | 31 381 | TCCTGTTCTGTCCATCCGCACCCACTATCTTCATGTTGTTGCAGATGAAGCGCGCAAGA   | 31 440 |
| 1 | 31 441 | CCGTCTGAAGATACCTTCAACCCCGTGTATCCATATGACACGGAAACCGGTCCTCCAAC   | 31 500 |
|   |        |                                                               |        |
| 2 | 31 441 | CCGTCTGAAGATACCTTCAACCCCGTGTATCCATATGACACGGAAACCGGTCCTCCAAC   | 31 500 |
| 1 | 31 501 | GTGCCTTTTCTTACTCCTCCCTTTGTATCCCCAATGGGTTTCAAGAGAGTCCCCCTGGG   | 31 560 |
|   |        |                                                               |        |
| 2 | 31 501 | GTGCCTTTTCTTACTCCTCCCTTTGTATCCCCAATGGGTTTCAAGAGAGTCCCCCTGGG   | 31 560 |
| 1 | 31 561 | GTACTCTCTTTGCGCCTATCCGAACCTCTAGTTACCTCCAATGGCATGCTTGCGCTCAA   | 31 620 |
|   |        |                                                               |        |
| 2 | 31 561 | GTACTCTCTTTGCGCCTATCCGAACCTCTAGTTACCTCCAATGGCATGCTTGCGCTCAA   | 31 620 |
| 1 | 31 621 | ATGGGCAACGGCCTCTCTCTGGACGAGGCCGGCAACCTTACCTCCAAAATGTAACCACT   | 31 680 |
|   |        |                                                               |        |
| 2 | 31 621 | ATGGGCAACGGCCTCTCTCTGGACGAGGCCGGCAACCTTACCTCCAAAATGTAACCACT   | 31 680 |
| 1 | 31 681 | GTGAGCCACCTCTCAAAAAACCAAGTCAAACATAAACCTGGAAATATCTGCACCCCTC    | 31 740 |
|   |        |                                                               |        |
| 2 | 31 681 | GTGAGCCACCTCTCAAAAAACCAAGTCAAACATAAACCTGGAAATATCTGCACCCCTC    | 31 740 |

|   |        |                                                               |        |
|---|--------|---------------------------------------------------------------|--------|
| 1 | 31 741 | ACAGTTACCTCAGAAGCCCTAACTGTGGCTGCCGCCGCACCTCTAATGGTCGCGGGCAAC  | 31 800 |
|   |        |                                                               |        |
| 2 | 31 741 | ACAGTTACCTCAGAAGCCCTAACTGTGGCTGCCGCCGCACCTCTAATGGTCGCGGGCAAC  | 31 800 |
|   |        |                                                               |        |
| 1 | 31 801 | ACACTCACCATGCAATCACAGGCCCGCTAACCGTGCACGACTCCAAACTTAGCATTGCC   | 31 860 |
|   |        |                                                               |        |
| 2 | 31 801 | ACACTCACCATGCAATCACAGGCCCGCTAACCGTGCACGACTCCAAACTTAGCATTGCC   | 31 860 |
|   |        |                                                               |        |
| 1 | 31 861 | ACCCAAGGACCCCTCACAGTGTGAGAAGGAAAGCTAGCCCTGCAAACATCAGGCCCCCTC  | 31 920 |
|   |        |                                                               |        |
| 2 | 31 861 | ACCCAAGGACCCCTCACAGTGTGAGAAGGAAAGCTAGCCCTGCAAACATCAGGCCCCCTC  | 31 920 |
|   |        |                                                               |        |
| 1 | 31 921 | ACCACCACCGATAGCAGTACCCTTACTATCACTGCCTCACCCCTCTAACTACTGCCACT   | 31 980 |
|   |        |                                                               |        |
| 2 | 31 921 | ACCACCACCGATAGCAGTACCCTTACTATCACTGCCTCACCCCTCTAACTACTGCCACT   | 31 980 |
|   |        |                                                               |        |
| 1 | 31 981 | GGTAGCTTGGGCATTGACTTGAAAGAGCCATTTATACACAAAATGGAAAAGTAGGACTA   | 32 040 |
|   |        |                                                               |        |
| 2 | 31 981 | GGTAGCTTGGGCATTGACTTGAAAGAGCCATTTATACACAAAATGGAAAAGTAGGACTA   | 32 040 |
|   |        |                                                               |        |
| 1 | 32 041 | AAGTACGGGGCTCCTTTGCATGTAACAGACGACCTAAACACTTTGACCGTAGCAACTGGT  | 32 100 |
|   |        |                                                               |        |
| 2 | 32 041 | AAGTACGGGGCTCCTTTGCATGTAACAGACGACCTAAACACTTTGACCGTAGCAACTGGT  | 32 100 |
|   |        |                                                               |        |
| 1 | 32 101 | CCAGGTGTGACTATTAATAATACTTCCTTGCAAACCTAAAGTTACTGGAGCCTTGGGTTTT | 32 160 |
|   |        |                                                               |        |
| 2 | 32 101 | CCAGGTGTGACTATTAATAATACTTCCTTGCAAACCTAAAGTTACTGGAGCCTTGGGTTTT | 32 160 |
|   |        |                                                               |        |
| 1 | 32 161 | GATTCACAAGGCAATATGCAACTTAATGTAGCAGGAGGACTAAGGATTGATTCTCAAAC   | 32 220 |
|   |        |                                                               |        |
| 2 | 32 161 | GATTCACAAGGCAATATGCAACTTAATGTAGCAGGAGGACTAAGGATTGATTCTCAAAC   | 32 220 |
|   |        |                                                               |        |
| 1 | 32 221 | AGACGCCTTATACTTGATGTTAGTTATCCGTTTGATGCTCAAACCAACTAAATCTAAGA   | 32 280 |
|   |        |                                                               |        |
| 2 | 32 221 | AGACGCCTTATACTTGATGTTAGTTATCCGTTTGATGCTCAAACCAACTAAATCTAAGA   | 32 280 |
|   |        |                                                               |        |
| 1 | 32 281 | CTAGGACAGGGCCCTCTTTTTATAAACTCAGCCACAACCTTGGATATTAACATAACAAA   | 32 340 |
|   |        |                                                               |        |
| 2 | 32 281 | CTAGGACAGGGCCCTCTTTTTATAAACTCAGCCACAACCTTGGATATTAACATAACAAA   | 32 340 |



|   |        |                                                               |        |
|---|--------|---------------------------------------------------------------|--------|
| 1 | 32 941 | TTTGTCTTCCTAATGCGGGAACACATAAATGAAAATTATATTTTTTGGTCAATGCTACTAC | 33 000 |
|   |        |                                                               |        |
| 2 | 32 941 | TTTGTCTTCCTAATGCGGGAACACATAAATGAAAATTATATTTTTTGGTCAATGCTACTAC | 33 000 |
|   |        |                                                               |        |
| 1 | 33 001 | AAAGCAAGCGATGGTGCCCTTTTTCCGTTGGAAGTTACTGTTATGCTTAATAAACGCCTG  | 33 060 |
|   |        |                                                               |        |
| 2 | 33 001 | AAAGCAAGCGATGGTGCCCTTTTTCCGTTGGAAGTTACTGTTATGCTTAATAAACGCCTG  | 33 060 |
|   |        |                                                               |        |
| 1 | 33 061 | CCAGATAGTCGCACATCCTATGTTATGACTTTTTTATGGTCCTTGAATGCTGGTCTAGCT  | 33 120 |
|   |        |                                                               |        |
| 2 | 33 061 | CCAGATAGTCGCACATCCTATGTTATGACTTTTTTATGGTCCTTGAATGCTGGTCTAGCT  | 33 120 |
|   |        |                                                               |        |
| 1 | 33 121 | CCAGAACTACTCAGGCAACCCTCATAACCTCCCCATTTACCTTTTCCTATATTAGAGAA   | 33 180 |
|   |        |                                                               |        |
| 2 | 33 121 | CCAGAACTACTCAGGCAACCCTCATAACCTCCCCATTTACCTTTTCCTATATTAGAGAA   | 33 180 |
|   |        |                                                               |        |
| 1 | 33 181 | GATGACTAATAAACTCTAAAGAATCGTTTGTGTTATGTTTCAACGTGTTTATTTTTCAAT  | 33 240 |
|   |        |                                                               |        |
| 2 | 33 181 | GATGACTAATAAACTCTAAAGAATCGTTTGTGTTATGTTTCAACGTGTTTATTTTTCAAT  | 33 240 |
|   |        |                                                               |        |
| 1 | 33 241 | TGCAGAAAATTTCAAGTCATTTTTTCATTCAGTAGTATAGCCCCACCACCACATAGCTTAT | 33 300 |
|   |        |                                                               |        |
| 2 | 33 241 | TGCAGAAAATTTCAAGTCATTTTTTCATTCAGTAGTATAGCCCCACCACCACATAGCTTAT | 33 300 |
|   |        |                                                               |        |
| 1 | 33 301 | ACAGATCACCGTACCTTAATCAAACCTCACAGAACCCTAGTATTCAACCTGCCACCTCCCT | 33 360 |
|   |        |                                                               |        |
| 2 | 33 301 | ACAGATCACCGTACCTTAATCAAACCTCACAGAACCCTAGTATTCAACCTGCCACCTCCCT | 33 360 |
|   |        |                                                               |        |
| 1 | 33 361 | CCCAACACACAGAGTACACAGTCCTTTCTCCCCGGCTGGCCTTAAAAAGCATCATATCAT  | 33 420 |
|   |        |                                                               |        |
| 2 | 33 361 | CCCAACACACAGAGTACACAGTCCTTTCTCCCCGGCTGGCCTTAAAAAGCATCATATCAT  | 33 420 |
|   |        |                                                               |        |
| 1 | 33 421 | GGGTAACAGACATATTCTTAGGTGTTATATTCCACACGGTTTCTGTGCGAGCCAAACGCT  | 33 480 |
|   |        |                                                               |        |
| 2 | 33 421 | GGGTAACAGACATATTCTTAGGTGTTATATTCCACACGGTTTCTGTGCGAGCCAAACGCT  | 33 480 |
|   |        |                                                               |        |
| 1 | 33 481 | CATCAGTGATATTAATAAACTCCCCGGGCAGCTCACTTAAGTTCATGTGCTGTCCAGCT   | 33 540 |
|   |        |                                                               |        |
| 2 | 33 481 | CATCAGTGATATTAATAAACTCCCCGGGCAGCTCACTTAAGTTCATGTGCTGTCCAGCT   | 33 540 |



|   |        |                                                                |        |
|---|--------|----------------------------------------------------------------|--------|
| 1 | 33 541 | GCTGAGCCACAGGCTGCTGTCCAACCTTGCGGTTGCTTAACGGGCGGGCGAAGGAGAAGTCC | 33 600 |
|   |        |                                                                |        |
| 2 | 33 541 | GCTGAGCCACAGGCTGCTGTCCAACCTTGCGGTTGCTTAACGGGCGGGCGAAGGAGAAGTCC | 33 600 |
|   |        |                                                                |        |
| 1 | 33 601 | ACGCCTACATGGGGGTAGAGTCATAATCGTGCATCAGGATAGGGCGGTGGTGCTGCAGCA   | 33 660 |
|   |        |                                                                |        |
| 2 | 33 601 | ACGCCTACATGGGGGTAGAGTCATAATCGTGCATCAGGATAGGGCGGTGGTGCTGCAGCA   | 33 660 |
|   |        |                                                                |        |
| 1 | 33 661 | GCGCGCGAATAAACTGCTGCCGCCGCCGCTCCGTCCTGCAGGAATACAACATGGCAGTGG   | 33 720 |
|   |        |                                                                |        |
| 2 | 33 661 | GCGCGCGAATAAACTGCTGCCGCCGCCGCTCCGTCCTGCAGGAATACAACATGGCAGTGG   | 33 720 |
|   |        |                                                                |        |
| 1 | 33 721 | TCTCCTCAGCGATGATTCGCACCGCCCGCAGCATAAGGCGCCTTGTCTCCGGGCACAGC    | 33 780 |
|   |        |                                                                |        |
| 2 | 33 721 | TCTCCTCAGCGATGATTCGCACCGCCCGCAGCATAAGGCGCCTTGTCTCCGGGCACAGC    | 33 780 |
|   |        |                                                                |        |
| 1 | 33 781 | AGCGCACCCCTGATCTCACTTAAATCAGCACAGTAACTGCAGCACAGCACCAATATTGT    | 33 840 |
|   |        |                                                                |        |
| 2 | 33 781 | AGCGCACCCCTGATCTCACTTAAATCAGCACAGTAACTGCAGCACAGCACCAATATTGT    | 33 840 |
|   |        |                                                                |        |
| 1 | 33 841 | TCAAAATCCCACAGTGCAAGGCGCTGTATCCAAAGCTCATGGCGGGGACCACAGAACCCA   | 33 900 |
|   |        |                                                                |        |
| 2 | 33 841 | TCAAAATCCCACAGTGCAAGGCGCTGTATCCAAAGCTCATGGCGGGGACCACAGAACCCA   | 33 900 |
|   |        |                                                                |        |
| 1 | 33 901 | CGTGCCATCATAACCACAAGCGCAGGTAGATTAAGTGGCGACCCCTCATAAACACGCTGG   | 33 960 |
|   |        |                                                                |        |
| 2 | 33 901 | CGTGCCATCATAACCACAAGCGCAGGTAGATTAAGTGGCGACCCCTCATAAACACGCTGG   | 33 960 |
|   |        |                                                                |        |
| 1 | 33 961 | ACATAAACATTACCTCTTTTGGCATGTTGTAATTCACCACCTCCCGGTACCATATAAACC   | 34 020 |
|   |        |                                                                |        |
| 2 | 33 961 | ACATAAACATTACCTCTTTTGGCATGTTGTAATTCACCACCTCCCGGTACCATATAAACC   | 34 020 |
|   |        |                                                                |        |
| 1 | 34 021 | TCTGATTAAACATGGCGCCATCCACCACCATCCTAAACCAGCTGGCCAAAACCTGCCCGC   | 34 080 |
|   |        |                                                                |        |
| 2 | 34 021 | TCTGATTAAACATGGCGCCATCCACCACCATCCTAAACCAGCTGGCCAAAACCTGCCCGC   | 34 080 |
|   |        |                                                                |        |
| 1 | 34 081 | CGGCTATACACTGCAGGGAACCGGGACTGGAACAATGACAGTGGAGAGCCCAGGACTCGT   | 34 140 |
|   |        |                                                                |        |
| 2 | 34 081 | CGGCTATACACTGCAGGGAACCGGGACTGGAACAATGACAGTGGAGAGCCCAGGACTCGT   | 34 140 |

|   |        |                                                               |        |
|---|--------|---------------------------------------------------------------|--------|
| 1 | 34 141 | AACCATGGATCATCATGCTCGTCATGATATCAATGTTGGCACAACACAGGCACACGTGCA  | 34 200 |
|   |        |                                                               |        |
| 2 | 34 141 | AACCATGGATCATCATGCTCGTCATGATATCAATGTTGGCACAACACAGGCACACGTGCA  | 34 200 |
|   |        |                                                               |        |
| 1 | 34 201 | TACACTTCCTCAGGATTACAAGCTCCTCCCGCGTTAGAACCATATCCCAGGGAACAACCC  | 34 260 |
|   |        |                                                               |        |
| 2 | 34 201 | TACACTTCCTCAGGATTACAAGCTCCTCCCGCGTTAGAACCATATCCCAGGGAACAACCC  | 34 260 |
|   |        |                                                               |        |
| 1 | 34 261 | ATTCCTGAATCAGCGTAAATCCACACTGCAGGGAAGACCTCGCACGTAACCTCACGTTGT  | 34 320 |
|   |        |                                                               |        |
| 2 | 34 261 | ATTCCTGAATCAGCGTAAATCCACACTGCAGGGAAGACCTCGCACGTAACCTCACGTTGT  | 34 320 |
|   |        |                                                               |        |
| 1 | 34 321 | GCATTGTCAAAGTGTTACATTTCGGGCAGCAGCGGATGATCCTCCAGTATGGTAGCGCGGG | 34 380 |
|   |        |                                                               |        |
| 2 | 34 321 | GCATTGTCAAAGTGTTACATTTCGGGCAGCAGCGGATGATCCTCCAGTATGGTAGCGCGGG | 34 380 |
|   |        |                                                               |        |
| 1 | 34 381 | TTTCTGTCTCAAAGGAGGTAGACGATCCCTACTGTACGGAGTGCGCCGAGACAACCGAG   | 34 440 |
|   |        |                                                               |        |
| 2 | 34 381 | TTTCTGTCTCAAAGGAGGTAGACGATCCCTACTGTACGGAGTGCGCCGAGACAACCGAG   | 34 440 |
|   |        |                                                               |        |
| 1 | 34 441 | ATCGTGTTGGTCGTAGTGTTCATGCCAAATGGAACGCCGGACGTAGTCATATTTCTGAAG  | 34 500 |
|   |        |                                                               |        |
| 2 | 34 441 | ATCGTGTTGGTCGTAGTGTTCATGCCAAATGGAACGCCGGACGTAGTCATATTTCTGAAG  | 34 500 |
|   |        |                                                               |        |
| 1 | 34 501 | CAAAACCAGGTGCGGGCGTGACAAACAGATCTGCGTCTCCGGTCTCGCCGCTTAGATCGC  | 34 560 |
|   |        |                                                               |        |
| 2 | 34 501 | CAAAACCAGGTGCGGGCGTGACAAACAGATCTGCGTCTCCGGTCTCGCCGCTTAGATCGC  | 34 560 |
|   |        |                                                               |        |
| 1 | 34 561 | TCTGTGTAGTAGTTGTAGTATATCCACTCTCTCAAAGCATCCAGGCGCCCCCTGGCTTCG  | 34 620 |
|   |        |                                                               |        |
| 2 | 34 561 | TCTGTGTAGTAGTTGTAGTATATCCACTCTCTCAAAGCATCCAGGCGCCCCCTGGCTTCG  | 34 620 |
|   |        |                                                               |        |
| 1 | 34 621 | GGTTCTATGTAAACTCCTTCATGCGCCGCTGCCCTGATAACATCCACCACCGCAGAATAA  | 34 680 |
|   |        |                                                               |        |
| 2 | 34 621 | GGTTCTATGTAAACTCCTTCATGCGCCGCTGCCCTGATAACATCCACCACCGCAGAATAA  | 34 680 |
|   |        |                                                               |        |
| 1 | 34 681 | GCCACACCCAGCCAACCTACACATTCGTTCTGCGAGTCACACACGGGAGGAGCGGGAAGA  | 34 740 |
|   |        |                                                               |        |
| 2 | 34 681 | GCCACACCCAGCCAACCTACACATTCGTTCTGCGAGTCACACACGGGAGGAGCGGGAAGA  | 34 740 |

|   |        |                                                                   |        |
|---|--------|-------------------------------------------------------------------|--------|
| 1 | 34 741 | GCTGGAAGAACCATGTTTTTTTTTTTTTATTCCAAAAGATTATCCAAAACCTCAAATGAAG<br> | 34 800 |
| 2 | 34 741 | GCTGGAAGAACCATGTTTTTTTTTTTTTATTCCAAAAGATTATCCAAAACCTCAAATGAAG     | 34 800 |
| 1 | 34 801 | ATCTATTAAGTGAACGCGCTCCCCTCCGGTGGCGTGGTCAAACCTCTACAGCCAAAGAACA<br> | 34 860 |
| 2 | 34 801 | ATCTATTAAGTGAACGCGCTCCCCTCCGGTGGCGTGGTCAAACCTCTACAGCCAAAGAACA     | 34 860 |
| 1 | 34 861 | GATAATGGCATTGTGTAAGATGTTGCACAATGGCTTCCAAAAGGCAAACGGCCCTCACGTC<br> | 34 920 |
| 2 | 34 861 | GATAATGGCATTGTGTAAGATGTTGCACAATGGCTTCCAAAAGGCAAACGGCCCTCACGTC     | 34 920 |
| 1 | 34 921 | CAAGTGGACGTAAAGGCTAAACCCTTCAGGGTGAATCTCCTCTATAAACATTCCAGCACC<br>  | 34 980 |
| 2 | 34 921 | CAAGTGGACGTAAAGGCTAAACCCTTCAGGGTGAATCTCCTCTATAAACATTCCAGCACC      | 34 980 |
| 1 | 34 981 | TTCAACCATGCCCAAATAATTCTCATCTCGCCACCTTCTCAATATATCTCTAAGCAAATC<br>  | 35 040 |
| 2 | 34 981 | TTCAACCATGCCCAAATAATTCTCATCTCGCCACCTTCTCAATATATCTCTAAGCAAATC      | 35 040 |
| 1 | 35 041 | CCGAATATTAAGTCCGGCCATTGTAAAAATCTGCTCCAGAGCGCCCTCCACCTTCAGCCT<br>  | 35 100 |
| 2 | 35 041 | CCGAATATTAAGTCCGGCCATTGTAAAAATCTGCTCCAGAGCGCCCTCCACCTTCAGCCT      | 35 100 |
| 1 | 35 101 | CAAGCAGCGAATCATGATTGCAAAAATTCAGGTTCTCACAGACCTGTATAAGATTCAA<br>    | 35 160 |
| 2 | 35 101 | CAAGCAGCGAATCATGATTGCAAAAATTCAGGTTCTCACAGACCTGTATAAGATTCAA        | 35 160 |
| 1 | 35 161 | AGCGGAACATTAACAAAAATACCGCGATCCCGTAGGTCCCTTCGCAGGGCCAGCTGAACA<br>  | 35 220 |
| 2 | 35 161 | AGCGGAACATTAACAAAAATACCGCGATCCCGTAGGTCCCTTCGCAGGGCCAGCTGAACA      | 35 220 |
| 1 | 35 221 | TAATCGTGCAGGTCTGCACGGACCAGCGCGGCCACTTCCCCGCCAGGAACCATGACAAAA<br>  | 35 280 |
| 2 | 35 221 | TAATCGTGCAGGTCTGCACGGACCAGCGCGGCCACTTCCCCGCCAGGAACCATGACAAAA      | 35 280 |
| 1 | 35 281 | GAACCCACACTGATTATGACACGCATACTCGGAGCTATGCTAACCAGCGTAGCCCCGATG<br>  | 35 340 |
| 2 | 35 281 | GAACCCACACTGATTATGACACGCATACTCGGAGCTATGCTAACCAGCGTAGCCCCGATG      | 35 340 |

|   |        |                                                               |        |
|---|--------|---------------------------------------------------------------|--------|
| 1 | 35 341 | TAAGCTTGTTGCATGGGCGGCGATATAAAAATGCAAGGTGCTGCTCAAAAAATCAGGCAAA | 35 400 |
|   |        |                                                               |        |
| 2 | 35 341 | TAAGCTTGTTGCATGGGCGGCGATATAAAAATGCAAGGTGCTGCTCAAAAAATCAGGCAAA | 35 400 |
|   |        |                                                               |        |
| 1 | 35 401 | GCCTCGCGCAAAAAAGAAAGCACATCGTAGTCATGCTCATGCAGATAAAGGCAGGTAAGC  | 35 460 |
|   |        |                                                               |        |
| 2 | 35 401 | GCCTCGCGCAAAAAAGAAAGCACATCGTAGTCATGCTCATGCAGATAAAGGCAGGTAAGC  | 35 460 |
|   |        |                                                               |        |
| 1 | 35 461 | TCCGGAACCACCACAGAAAAAGACACCATTTTTCTCTCAAACATGTCTGCGGGTTTCTGC  | 35 520 |
|   |        |                                                               |        |
| 2 | 35 461 | TCCGGAACCACCACAGAAAAAGACACCATTTTTCTCTCAAACATGTCTGCGGGTTTCTGC  | 35 520 |
|   |        |                                                               |        |
| 1 | 35 521 | ATAAACACAAAATAAAATAACAAAAAACATTTAAACATTAGAAGCCTGTCTTACAACAG   | 35 580 |
|   |        |                                                               |        |
| 2 | 35 521 | ATAAACACAAAATAAAATAACAAAAAACATTTAAACATTAGAAGCCTGTCTTACAACAG   | 35 580 |
|   |        |                                                               |        |
| 1 | 35 581 | GAAAAACAACCCTTATAAGCATAAGACGGACTACGGCCATGCCGGCGTGACCGTAAAAAA  | 35 640 |
|   |        |                                                               |        |
| 2 | 35 581 | GAAAAACAACCCTTATAAGCATAAGACGGACTACGGCCATGCCGGCGTGACCGTAAAAAA  | 35 640 |
|   |        |                                                               |        |
| 1 | 35 641 | ACTGGTCACCGTGATTAAAAAGCACACCACGACAGCTCCTCGGTCATGTCCGGAGTCATAA | 35 700 |
|   |        |                                                               |        |
| 2 | 35 641 | ACTGGTCACCGTGATTAAAAAGCACACCACGACAGCTCCTCGGTCATGTCCGGAGTCATAA | 35 700 |
|   |        |                                                               |        |
| 1 | 35 701 | TGTAAGACTCGGTAAACACATCAGGTTGATTACATCGGTCAGTGCTAAAAAGCGACCGA   | 35 760 |
|   |        |                                                               |        |
| 2 | 35 701 | TGTAAGACTCGGTAAACACATCAGGTTGATTACATCGGTCAGTGCTAAAAAGCGACCGA   | 35 760 |
|   |        |                                                               |        |
| 1 | 35 761 | AATAGCCCGGGGAATACATACCCGCAGGCGTAGAGACAACATTACAGCCCCATAGGAG    | 35 820 |
|   |        |                                                               |        |
| 2 | 35 761 | AATAGCCCGGGGAATACATACCCGCAGGCGTAGAGACAACATTACAGCCCCATAGGAG    | 35 820 |
|   |        |                                                               |        |
| 1 | 35 821 | GTATAACAAAATTAATAGGAGAGAAAAACACATAAACACCTGAAAAACCCTCCTGCCTAG  | 35 880 |
|   |        |                                                               |        |
| 2 | 35 821 | GTATAACAAAATTAATAGGAGAGAAAAACACATAAACACCTGAAAAACCCTCCTGCCTAG  | 35 880 |
|   |        |                                                               |        |
| 1 | 35 881 | GCAAAATAGCACCTCCCGCTCCAGAACAACATACAGCGCTTCCACAGCGGCAGCCATAA   | 35 940 |
|   |        |                                                               |        |
| 2 | 35 881 | GCAAAATAGCACCTCCCGCTCCAGAACAACATACAGCGCTTCCACAGCGGCAGCCATAA   | 35 940 |

|   |        |                                                               |        |
|---|--------|---------------------------------------------------------------|--------|
| 1 | 35 941 | CAGTCAGCCTTACCAGTAAAAAAGAAAACCTATTAAAAAAACACCACTCGACACGGCACC  | 36 000 |
|   |        |                                                               |        |
| 2 | 35 941 | CAGTCAGCCTTACCAGTAAAAAAGAAAACCTATTAAAAAAACACCACTCGACACGGCACC  | 36 000 |
|   |        |                                                               |        |
| 1 | 36 001 | AGCTCAATCAGTCACAGTGTAAAAAAGGGCCAAGTGCAGAGCGAGTATATATAGGACTAA  | 36 060 |
|   |        |                                                               |        |
| 2 | 36 001 | AGCTCAATCAGTCACAGTGTAAAAAAGGGCCAAGTGCAGAGCGAGTATATATAGGACTAA  | 36 060 |
|   |        |                                                               |        |
| 1 | 36 061 | AAAATGACGTAACGGTTAAAGTCCACAAAAAACACCCAGAAAACCGCACGCGAACCTACG  | 36 120 |
|   |        |                                                               |        |
| 2 | 36 061 | AAAATGACGTAACGGTTAAAGTCCACAAAAAACACCCAGAAAACCGCACGCGAACCTACG  | 36 120 |
|   |        |                                                               |        |
| 1 | 36 121 | CCCAGAAACGAAAGCCAAAAAACCCACAACCTTCCTCAAATCGTCACTTCCGTTTTCCAC  | 36 180 |
|   |        |                                                               |        |
| 2 | 36 121 | CCCAGAAACGAAAGCCAAAAAACCCACAACCTTCCTCAAATCGTCACTTCCGTTTTCCAC  | 36 180 |
|   |        |                                                               |        |
| 1 | 36 181 | GTTACGTCACTTCCCATTTTAAGAAAACCTACAATTCCCAACACATACAAGTTACTCCGCC | 36 240 |
|   |        |                                                               |        |
| 2 | 36 181 | GTTACGTCACTTCCCATTTTAAGAAAACCTACAATTCCCAACACATACAAGTTACTCCGCC | 36 240 |
|   |        |                                                               |        |
| 1 | 36 241 | CTAAAACCTACGTCACCCGCCCGTTCCACGCCCCGCGCCACGTCACAACTCCACCCC     | 36 300 |
|   |        |                                                               |        |
| 2 | 36 241 | CTAAAACCTACGTCACCCGCCCGTTCCACGCCCCGCGCCACGTCACAACTCCACCCC     | 36 300 |
|   |        |                                                               |        |
| 1 | 36 301 | CTCATTATCATATTGGCTTCAATCCAAAATAAGGTATATTATTGATGATG            | 36 350 |
|   |        |                                                               |        |
| 2 | 36 301 | CTCATTATCATATTGGCTTCAATCCAAAATAAGGTATATTATTGATGATG            | 36 350 |

**Sequence Logo:** 50% GC base composition

**Consensus Threshold:** >50%

**Compare to:** the consensus

Bases that match the reference are marked with yellow highlighting.

**Created:** 22. tammik. 2021

**Last Modified:** 22. tammik. 2021
